# Supplementary material
Source: Research Square preprint supplement (doi:10.21203/rs.3.rs-9898928/v1)
Supplement: Supplementary file 1 [file 385a69141711e12a4b669754.xlsx]

## Sheet: Supp. Table 1
Deidentified Accession ID	Date Collected	Source	Facility	Deidentified Patient ID	SRR	Biosample Accession	Clade Type	Group	Subclade	Amphotericin_B	Anidulafungin	Caspofungin	Fluconazole	Isavuconazole	Itraconazole	Micafungin	Posaconazole	Voriconazole	FKS1	ERG11	FUR1	B9J08_000401	B9J08_003737	B9J08_005340	B9J08_005343
NV00001	2022-11-01 21:00:00	Not Indicated	F35	PID00003	SRR23108852	SAMN32669990	Clade3	9	3.A.9.A
NV00002	2023-02-05 21:00:00	Urine	F36	PID00003	SRR23920659	SAMN33829914	Clade3	9	3.A.9.A	0.5	0.5	0.25	256	0.25	0.5	0.5	0.25	4
NV00003	2023-10-25 21:00:00	Urine	F36	PID00004	SRR27645248	SAMN39504834	Clade1	1	1.A.1.A	0.5	0.25		>256	2	2	0.25	1	2		ERG11: Lys143Arg		B9J08_000401: Gln142*
NV00004	2024-03-19 21:00:00	Axilla/Groin	F33	PID00005	SRR30846263	SAMN43830216	Clade1	1	1.B.1.A											ERG11: Tyr132Phe
NV00005	2024-04-01 21:00:00	Urine	F39	PID00005	SRR30847298	SAMN43830040	Clade1	1	1.B.1.A	1	0.12		64	0.06	0.25	0.06	0.06	0.5		ERG11: Tyr132Phe
NV00006	2023-07-31 21:00:00	Axilla/Groin	F39	PID00006	SRR27135695	SAMN38336303	Clade3	4	3.A.4.B
NV00007	2024-06-10 21:00:00	Axilla/Groin	F36	PID00011	SRR30946919	SAMN44246104	Clade3	4	3.A.4.F												FUR1: Gly207Asp
NV00008	2024-07-23 21:00:00	Axilla/Groin	F36	PID00012	SRR33388472	SAMN48264947	Clade3	6	3.A.6.B
NV00009	2024-08-03 21:00:00	Sputum	F36	PID00012	SRR33391944	SAMN48270063	Clade1	1	1.B.1.A	0.5	0.25		256	0.12	0.12	0.06	0.03	1		ERG11: Tyr132Phe
NV00010	2024-07-08 21:00:00	Blood	F38	PID00015	SRR33388477	SAMN48264952	Clade3	10	3.A.10.E	1	0.5		>256	0.12	0.5	0.25	0.12	1
NV00011	2022-09-27 21:00:00	Wound	F36	PID00013	SRR23108872	SAMN32670106	Clade3	7	3.A.7.E	1	0.5	0.12	256	0.12	0.25	0.12	0.12	1
NV00012	2024-05-20 21:00:00	Axilla/Groin	F36	PID00013	SRR30946492	SAMN44245644	Clade3	4	3.A.4.L
NV00013	2022-09-26 21:00:00	Skin Swab	F41	PID00013	SRR23137881	SAMN32797986	Clade1	11	1.A.11.A	0.5	0.5	0.25	256	0.5	0.5	0.25	0.25	1		ERG11: Lys143Arg		B9J08_000401: Gln142*
NV00014	2024-04-10 21:00:00	Axilla/Groin	F36	PID00015	SRR30865532	SAMN43829980	Clade3	10	3.A.10.E
NV00015	2024-07-15 21:00:00	Blood	F39	PID00015	SRR33392056	SAMN48270143	Clade3	10	3.A.10.E	0.5	0.12		64	0.12	0.25	0.12	0.12	0.5
NV00016	2024-05-02 21:00:00	Axilla/Groin	F28	PID00016	SRR30945875	SAMN44244871	Clade3	13	3.A.13.D												FUR1: Val103Gly
NV00017	2024-05-06 21:00:00	Axilla/Groin	F29	PID00016	SRR30946253	SAMN44245355	Clade3	13	3.A.13.D												FUR1: Val103Gly
NV00018	2023-01-12 21:00:00	Axilla/Groin	F39	PID00017	SRR23920723	SAMN33829882	Clade3	4	3.A.4.G
NV00019	2022-02-10	Urine	F40	PID03429	SRR19738650	SAMN29101367	Clade1	2	1.A.2.H	0.5	1	0.5	256	0.5	0.5	0.25	0.25	2		ERG11: Lys143Arg		B9J08_000401: Gln142*
NV00020	2022-10-04 21:00:00	Skin Swab	F40	PID00019	SRR23108828	SAMN32670094	Clade3	4	3.A.4.J
NV00021	2022-06-09	Wound	F31	PID00023	SRR20081630	SAMN29634983	Clade1	8	1.A.8.A	0.25	0.06	0.12	256	0.25	0.25	0.12	0.12	2		ERG11: Lys143Arg		B9J08_000401: Gln142*
NV00022	2022-06-12 21:00:00	Axilla/Groin	F36	PID00023	SRR20081622	SAMN29634975	Clade1	8	1.A.8.A											ERG11: Lys143Arg		B9J08_000401: Gln142*
NV00023	2022-07-26 21:00:00	Wound	F36	PID00023	SRR23958473	SAMN30468047	Clade1	8	1.A.8.A	0.25	0.12	0.25	128	0.5	0.5	0.5	0.12	1		ERG11: Lys143Arg		B9J08_000401: Gln142*
NV00024	2022-08-21 21:00:00	Skin Swab	F41	PID00026	SRR23109068	SAMN32670274	Clade3	4	3.A.4.D	0.5	0.5	0.25	32	0.06	0.25		0.25	1
NV00025	2022-06-26 21:00:00	Bronchial Washing	F15	PID00026	SRR23109224	SAMN32670344	Clade3	4	3.A.4.D
NV00026	2023-06-21 21:00:00	Axilla/Groin	F30	PID00027	SRR27130962	SAMN38336705	Clade3	6	3.A.6.E
NV00027	2023-09-20 21:00:00	Skin Swab	F39	PID00029	SRR27645416	SAMN39504748	Clade3	6	3.A.6.E	0.5	0.5	0.25	>256	0.12	0.5	0.5	0.25	1
NV00028	2024-07-12 21:00:00	Wound	F39	PID00029	SRR30945855	SAMN44244912	Clade3	6	3.A.6.E	0.5	0.25		128	0.12	0.25	0.25	0.12	1
NV00029	2023-10-18 21:00:00	Axilla/Groin	F36	PID00031	SRR27607905	SAMN39273851	Clade1	5	1.B.5.A											ERG11: Tyr132Phe
NV00030	2023-07-24 21:00:00	Axilla/Groin	F12	PID00034	SRR27135759	SAMN38336298	Clade3	6	3.A.6.A
NV00031	2024-01-12 21:00:00	Axilla/Groin	F12	PID00034	SRR30846282	SAMN43830235	Clade3	6	3.A.6.A
NV00032	2023-12-31 21:00:00	Skin Swab	F38	PID00034	SRR29364651	SAMN41409107	Clade3	6	3.A.6.A	0.5	0.25		256	0.06	0.12	0.06	0.03	2
NV00033	2023-06-12 21:00:00	Axilla/Groin	F39	PID00034	SRR27135919	SAMN38336504	Clade3	6	3.A.6.C
NV00034	2024-01-10 21:00:00	Sputum	F38	PID00038	SRR29365140	SAMN41409157	Clade3	12	3.A.12.H	0.5	0.5		64	0.06	0.5	0.25	0.12	0.5
NV00035	2024-01-10 21:00:00	Blood	F38	PID00038	SRR29365130	SAMN41409158	Clade3	2	3.A.2.D
NV00036	2024-06-03 21:00:00	Axilla/Groin	F13	PID00039	SRR30946447	SAMN44245599	Clade3	13	3.A.13.I
NV00037	2024-01-18 21:00:00	Urine	F38	PID00041	SRR29365093	SAMN41409222	Clade3	11	3.A.11.H	0.5	1		>256	0.25	0.5	0.5	0.25	2
NV00038	2024-03-31 21:00:00	Axilla/Groin	F36	PID00042	SRR30847357	SAMN43830099	Clade3	13	3.A.13.H
NV00039	2023-07-21 21:00:00	Joint	F36	PID00046	SRR27135761	SAMN38336459	Clade3	4	3.A.4.K	0.5	0.25	0.25	256	0.25	0.5		0.25	2
NV00040	2023-11-17 21:00:00	Skin Swab	F36	PID00046	SRR27607884	SAMN39273734	Clade3	4	3.A.4.O
NV00041	2024-02-22 21:00:00	Wound	F36	PID00046	SRR29280507	SAMN41409455	Clade1	13	1.A.13.F											ERG11: Lys143Arg	FUR1: Glu64*	B9J08_000401: Gln142*
NV00042	2024-03-06 21:00:00	Axilla/Groin	F02	PID00047	SRR30846371	SAMN43817281	Clade3	3	3.A.3.A
NV00044	2024-03-01 21:00:00	Axilla/Groin	F36	PID00049	SRR29278657	SAMN41409501	Clade1	5	1.B.5.A											ERG11: Tyr132Phe
NV00045	2024-09-17	Urine	F39	PID00560	SRR33403344	SAMN48286702	Clade1	12	1.A.12.B	0.25	0.25		64	0.12	0.25	0.25	0.12	0.5		ERG11: Lys143Arg	FUR1: Arg101Leu	B9J08_000401: Gln142*
NV00046	2024-06-03 21:00:00	Axilla/Groin	F13	PID00050	SRR30946379	SAMN44245408	Clade3	8	3.A.8.A
NV00047	2024-01-26 21:00:00	Axilla/Groin	F36	PID00051	SRR29363991	SAMN41409276	Clade1	13	1.A.13.F											ERG11: Lys143Arg	FUR1: Glu64*	B9J08_000401: Gln142*
NV00048	2023-11-19 21:00:00	Axilla/Groin	F14	PID00052	SRR27645310	SAMN39504588	Clade1	2	1.A.2.F											ERG11: Lys143Arg		B9J08_000401: Gln142*
NV00049	2024-08-07 21:00:00	Urine	F38	PID00053	SRR33392019	SAMN48270049	Clade1	5	1.A.5.B	0.25	0.5		>256	1	1	0.25	0.25	4		ERG11: Lys143Arg		B9J08_000401: Gln142*
NV00050	2023-11-28 21:00:00	Axilla/Groin	F39	PID00054	SRR27718884	SAMN39600260	Clade3	13	3.A.13.K
NV00051	2024-03-03 21:00:00	Axilla/Groin	F36	PID00055	SRR30846377	SAMN43817287	Clade1	2	1.A.2.B											ERG11: Lys143Arg		B9J08_000401: Gln142*
NV00052	2024-03-24 21:00:00	Axilla/Groin	F36	PID00055	SRR30847392	SAMN43830134	Clade1	2	1.A.2.B											ERG11: Lys143Arg		B9J08_000401: Gln142*
NV00053	2023-07-14 21:00:00	Axilla/Groin	F02	PID00056	SRR27135653	SAMN38336550	Clade1	4	1.B.4.A											ERG11: Tyr132Phe
NV00054	2023-04-11 21:00:00	Axilla/Groin	F33	PID00058	SRR27636316	SAMN35640867	Clade3	6	3.A.6.B
NV00055	2024-12-09	Wound	F39	PID00058	SRR33405934	SAMN48288183	Clade3	6	3.A.6.B	1	1		>256	0.12	0.5	0.25	0.25	2
NV00056	2022-10-18 21:00:00	Not Indicated	F12	PID00057	SRR23108776	SAMN32670023	Clade1	3	1.A.3.A											ERG11: Lys143Arg		B9J08_000401: Gln142*
NV00057	2022-09-13 21:00:00	Axilla/Groin	F33	PID00059	SRR23109000	SAMN32670174	Clade1	3	1.A.3.A											ERG11: Lys143Arg	FUR1: Pro4fs	B9J08_000401: Gln142*
NV00058	2024-07-31 21:00:00	Axilla/Groin	F36	PID00061	SRR33392042	SAMN48270129	Clade3	12	3.A.12.D
NV00059	2024-07-31 21:00:00	Axilla/Groin	F36	PID00061	SRR33392043	SAMN48270130	Clade1	13	1.A.13.A											ERG11: Lys143Arg		B9J08_000401: Gln142*
NV00060	2023-01-11 21:00:00	Skin Swab	F15	PID00062	SRR23920749	SAMN33829973	Clade3	1	3.B.1.A
NV00061	2022-11-12 21:00:00	Urine	F36	PID00065	SRR23108800	SAMN32669970	Clade3	5	3.A.5.E	0.5	0.5	0.25	>256	0.25	0.5	0.25	0.25	4
NV00062	2023-09-17 21:00:00	Axilla/Groin	F36	PID00066	SRR27645464	SAMN39504712	Clade3	11	3.A.11.B
NV00063	2023-11-10 21:00:00	Axilla/Groin	F36	PID00067	SRR27645226	SAMN39504649	Clade3	9	3.A.9.A
NV00064	2021-11-18	Blood	F36	PID03424	SRR19738694	SAMN29101407	Clade3	5	3.A.5.E	0.5	0.5	0.25	256	0.12	0.5		0.12	1
NV00065	2021-11-18	Blood	F36	PID03424	SRR27135737	SAMN38336491	Clade3	5	3.A.5.E	0.5	0.5	0.25	256	0.12	0.5		0.12	1
NV00066	2022-11-16 21:00:00	Wound	F36	PID00069	SRR23137814	SAMN32797919	Clade3	6	3.A.6.E	0.5	1	0.25	>256	0.5	1	0.5	0.5	4
NV00067	2023-07-10 21:00:00	Axilla/Groin	F35	PID00068	SRR27135665	SAMN38336280	Clade3	8	3.A.8.E
NV00068	2023-07-21 21:00:00	Axilla/Groin	F35	PID00068	SRR27135777	SAMN38336327	Clade3	8	3.A.8.E
NV00069	2023-08-06 21:00:00	Axilla/Groin	F35	PID00068	SRR27135676	SAMN38336368	Clade3	8	3.A.8.E
NV00070	2023-06-07 21:00:00	Axilla/Groin	F38	PID00070	SRR25240153	SAMN36407595	Clade1	11	1.A.11.C											ERG11: Lys143Arg		B9J08_000401: Gln142*
NV00071	2022-08-22 21:00:00	Axilla/Groin	F12	PID03436	SRR23109054	SAMN32670260	Clade3	3	3.A.3.L
NV00072	2022-10-12 21:00:00	Axilla/Groin	F33	PID00072	SRR23108909	SAMN32670047	Clade3	9	3.A.9.A
NV00073	2024-10-09	Urine	F36	PID00072	SRR33403251	SAMN48286611	Clade3	9	3.A.9.A	0.5	2		>256	0.25	1	0.5	0.25	2
NV00074	2023-07-04 21:00:00	Axilla/Groin	F29	PID00073	SRR27135886	SAMN38336451	Clade3	5	3.A.5.D
NV00075	2023-12-23 21:00:00	Skin Swab	F36	PID00074	SRR28069430	SAMN40079060	Clade1	12	1.A.12.B										FKS1: Ser1358Phe	ERG11: Lys143Arg	FUR1: Arg101Leu	B9J08_000401: Gln142*
NV00076	2024-05-13 21:00:00	Axilla/Groin	F13	PID00075	SRR30946260	SAMN44245362	Clade3	3	3.A.3.L
NV00077	2024-12-13	Wound	F36	PID03078	SRR33405925	SAMN48288174	Clade1	3	1.A.3.D	0.25	0.12		256	1	0.5	0.12	0.25	2		ERG11: Lys143Arg		B9J08_000401: Gln142*
NV00078	2022-06-15 21:00:00	Axilla/Groin	F12	PID03404	SRR23958465	SAMN30468039	Clade3	3	3.A.3.G
NV00079	2022-08-23 21:00:00	Axilla/Groin	F12	PID03404	SRR23109091	SAMN32670297	Clade3	3	3.A.3.G
NV00080	2022-09-17 21:00:00	Blood	F36	PID00077	SRR23109148	SAMN32670140	Clade3	3	3.A.3.K	0.5	0.12	0.12	256	0.12	0.5	0.12	0.25	2
NV00081	2023-11-19 21:00:00	Axilla/Groin	F39	PID00078	SRR27645349	SAMN39504603	Clade1	4	1.A.4.B											ERG11: Lys143Arg	FUR1: Glu115*	B9J08_000401: Gln142*
NV00082	2023-10-26 21:00:00	Axilla/Groin	F33	PID00079	SRR27607844	SAMN39273811	Clade1	1	1.A.1.B											ERG11: Lys143Arg		B9J08_000401: Gln142*
NV00083	2024-07-03 21:00:00	Urine	F36	PID00079	SRR30947150	SAMN44246242	Clade1	1	1.A.1.B	0.25	0.5		128	0.5	1	0.25	0.25	0.5		ERG11: Lys143Arg		B9J08_000401: Gln142*
NV00084	2023-06-27 21:00:00	Urine	F39	PID00079	SRR27135893	SAMN38336768	Clade1	1	1.A.1.B	0.5	0.5	0.25	>256	0.5	0.5	0.25	0.12	2		ERG11: Lys143Arg		B9J08_000401: Gln142*
NV00085	2023-04-26 21:00:00	Urine	F36	PID00083	SRR27636297	SAMN35640963	Clade1	2	1.B.2.A											ERG11: Tyr132Phe
NV00086	2022-11-26 21:00:00	Urine	F41	PID00083	SRR23137801	SAMN32797906	Clade1	2	1.B.2.A	0.5	0.25	0.25	128	0.03	0.25	0.12	0.12	0.5		ERG11: Tyr132Phe
NV00087	2024-03-21 21:00:00	Axilla/Groin	F28	PID00084	SRR30945864	SAMN44244860	Clade3	4	3.A.4.L
NV00088	2024-03-28 21:00:00	Axilla/Groin	F36	PID00084	SRR30847356	SAMN43830098	Clade3	4	3.A.4.L
NV00089	2024-06-07 21:00:00	Axilla/Groin	F36	PID00084	SRR30946942	SAMN44246127	Clade3	4	3.A.4.L
NV00090	2024-06-07 21:00:00	Wound	F36	PID00084	SRR30947159	SAMN44246251	Clade3	4	3.A.4.L	0.5	0.5		>256	0.12	0.25	0.25	0.12	2
NV00092	2022-09-20 21:00:00	Skin Swab	F40	PID00086	SRR23109160	SAMN32670152	Clade3	3	3.A.3.E
NV00093	2022-08-04 21:00:00	Skin Swab	F40	PID00086	SRR23108890	SAMN32670124	Clade3	3	3.A.3.E
NV00094	2022-08-07 21:00:00	Skin Swab	F40	PID00086	SRR23108889	SAMN32670123	Clade3	3	3.A.3.E
NV00095	2022-08-01 21:00:00	Catheter Tip	F36	PID00086	SRR23109114	SAMN32670352	Clade3	3	3.A.3.E	0.13	0.25	0.12	128	0.12	0.25	0.12	0.12	1
NV00096	2022-08-04 21:00:00	Blood	F36	PID00086	SRR23109210	SAMN32670330	Clade3	3	3.A.3.E	0.5	0.12	0.06	64	0.06	0.12	0.06	0.06	1
NV00097	2022-08-07 21:00:00	Fistula	F36	PID00086	SRR23109209	SAMN32670329	Clade3	3	3.A.3.E	0.5	0.12	0.06	128	0.03	0.06	0.06	0.03	1
NV00098	2022-08-24 21:00:00	Skin Swab	F36	PID00086	SRR23109037	SAMN32670243	Clade3	3	3.A.3.E	0.25	0.25	0.12	128	0.12	0.25		0.12	1
NV00099	2023-08-07 21:00:00	Axilla/Groin	F36	PID00087	SRR27130879	SAMN38336676	Clade3	13	3.A.13.K
NV00100	2023-03-04 21:00:00	Urine	F39	PID00088	SRR27636382	SAMN35641068	Clade3	12	3.A.12.B	0.5	0.5	0.25	256	0.25	0.5	0.5	0.25	2
NV00101	2022-08-22 21:00:00	Axilla/Groin	F12	PID03429	SRR23109057	SAMN32670263	Clade3	5	3.A.5.E
NV00102	2023-07-14	Urine	F36	PID03156	SRR27135788	SAMN38336511	Clade1	3	1.A.3.C	0.25	0.5	0.25	>256	1	2		1	2		ERG11: Lys143Arg		B9J08_000401: Gln142*
NV00103	2023-07-14	Wound	F36	PID03156	SRR27135787	SAMN38336398	Clade1	3	1.A.3.C	0.5	0.5	0.25	>256	0.12	0.5		0.5	1		ERG11: Lys143Arg		B9J08_000401: Gln142*
NV00104	2024-07-28 21:00:00	Axilla/Groin	F36	PID00089	SRR33388539	SAMN48264924	Clade3	6	3.A.6.B
NV00105	2024-03-17 21:00:00	Urine	F39	PID00091	SRR30844583	SAMN43817358	Clade1	13	1.A.13.B	0.25	0.25		>256	0.5	0.25	0.12	0.12	1		ERG11: Lys143Arg		B9J08_000401: Gln142*
NV00106	2022-05-04 21:00:00	Skin	F31	PID00092	SRR19738712	SAMN29101423	Clade1	4	1.A.4.B	0.25	1	0.5	>256	0.25	0.25	0.5	0.25	1		ERG11: Lys143Arg		B9J08_000401: Gln142*
NV00107	2023-05-05 21:00:00	Axilla/Groin	F02	PID00093	SRR27636278	SAMN35640886	Clade3	11	3.A.11.E
NV00108	2023-05-14 21:00:00	Skin Swab	F39	PID00093	SRR27131009	SAMN38336637	Clade3	11	3.A.11.E
NV00109	2024-03-02 21:00:00	Axilla/Groin	F13	PID00094	SRR29278652	SAMN41409505	Clade3	3	3.A.3.G
NV00110	2024-02-08 21:00:00	Axilla/Groin	F36	PID00096	SRR29280589	SAMN41409365	Clade3	13	3.A.13.D												FUR1: Val103Gly
NV00111	2024-03-18 21:00:00	Axilla/Groin	F36	PID00096	SRR30847437	SAMN43830162	Clade3	13	3.A.13.D												FUR1: Val103Gly
NV00112	2023-09-24 21:00:00	Axilla/Groin	F36	PID00095	SRR27645425	SAMN39504764	Clade3	11	3.A.11.J
NV00113	2023-10-05 21:00:00	Tissue	F36	PID00095	SRR27645265	SAMN39504835	Clade3	11	3.A.11.B	0.5	0.25	0.25	>256	0.25	0.5	0.25	0.25	2
NV00114	2023-11-02 21:00:00	Cerebrospinal Fluid	F36	PID00095	SRR27607963	SAMN39273781	Clade3	11	3.A.11.J	1	0.25		>256	0.12	0.25	0.12	0.06	2
NV00115	2023-11-06 21:00:00	Wound	F36	PID00095	SRR27607953	SAMN39273771	Clade3	11	3.A.11.J	1	0.5		256	0.25	0.5	0.5	0.25	2
NV00116	2023-04-12 21:00:00	Blood	F36	PID00097	SRR27636459	SAMN35640943	Clade3	4	3.A.4.B
NV00117	2023-04-12 21:00:00	Wound	F36	PID00097	SRR27636458	SAMN35640942	Clade3	4	3.A.4.B
NV00118	2024-03-28 21:00:00	Axilla/Groin	F33	PID00098	SRR30847368	SAMN43830110	Clade3	10	3.A.10.E
NV00119	2023-06-14 21:00:00	Axilla/Groin	F29	PID00099	SRR27130978	SAMN38336686	Clade1	4	1.B.4.A											ERG11: Tyr132Phe
NV00120	2023-10-17 21:00:00	Axilla/Groin	F35	PID00101	SRR27607911	SAMN39273857	Clade3	4	3.A.4.K
NV00121	2023-02-05 21:00:00	Axilla/Groin	F35	PID00102	SRR23920698	SAMN33829945	Clade1	3	1.A.3.A											ERG11: Lys143Arg		B9J08_000401: Gln142*
NV00122	2024-07-30 21:00:00	Axilla/Groin	F12	PID00103	SRR33391997	SAMN48270116	Clade3	8	3.A.8.A
NV00123	2023-12-31 21:00:00	Axilla/Groin	F33	PID00104	SRR29364663	SAMN41409108	Clade1	2	1.B.2.A											ERG11: Tyr132Phe
NV00124	2024-07-29 21:00:00	Urine	F38	PID00107	SRR33391960	SAMN48270079	Clade1	1	1.B.1.A	1	0.25		128	0.06	0.12	0.12	0.06	0.5		ERG11: Tyr132Phe
NV00125	2022-03-07	Bronchial Washing	F15	PID03202	SRR19664611	SAMN29096895	Clade1	1	1.A.1.A											ERG11: Lys143Arg		B9J08_000401: Gln142*
NV00126	2022-03-04	Urine	F40	PID03202	SRR19738638	SAMN29101356	Clade1	4	1.A.4.B	2	0.5	0.25	256	1	1	0.25	0.5	1		ERG11: Lys143Arg		B9J08_000401: Gln142*
NV00127	2023-12-04 21:00:00	Axilla/Groin	F36	PID00108	SRR27718870	SAMN39600250	Clade3	12	3.A.12.D
NV00128	2024-02-01 21:00:00	Axilla/Groin	F36	PID00108	SRR29280625	SAMN41409324	Clade3	13	3.A.13.C												FUR1: Val103Gly
NV00129	2024-02-19 21:00:00	Axilla/Groin	F36	PID00108	SRR30844599	SAMN43817304	Clade3	12	3.A.12.D
NV00130	2024-02-18 21:00:00	Blood	F36	PID00108	SRR29280457	SAMN41409432	Clade3	6	3.A.6.B
NV00131	2024-11-12	Unknown	F36	PID03246	SRR33405843	SAMN48288239	Clade3	11	3.A.11.J	0.5	1		256	0.12	0.25	0.25	0.12	1
NV00132	2023-01-18 21:00:00	Axilla/Groin	F35	PID00109	SRR23920700	SAMN33829947	Clade3	4	3.A.4.K
NV00133	2024-05-23 21:00:00	Axilla/Groin	F10	PID00110	SRR30946484	SAMN44245636	Clade1	2	1.B.2.A											ERG11: Tyr132Phe
NV00134	2022-11-11 21:00:00	Bronchial Washing	F15	PID00111	SRR23137798	SAMN32797903	Clade3	4	3.A.4.D
NV00135	2022-09-07 21:00:00	Axilla/Groin	F39	PID00111	SRR23109179	SAMN32670203	Clade3	4	3.A.4.D
NV00136	2022-11-03 21:00:00	Axilla/Groin	F39	PID00111	SRR23137850	SAMN32797955	Clade3	4	3.A.4.D
NV00137	2022-09-22 21:00:00	Urine	F41	PID00111	SRR23108886	SAMN32670120	Clade3	3	3.A.3.G	1	0.5	0.12	256	0.12	0.5	0.12	0.12	2
NV00139	2022-06-01	Wound	F31	PID00112	SRR20081634	SAMN29634987	Clade3	6	3.A.6.C	0.5	0.5	0.25	128	0.12	0.5	0.25	0.25	1
NV00140	2024-01-14 21:00:00	Axilla/Groin	F36	PID00113	SRR29365127	SAMN41409178	Clade3	5	3.A.5.E
NV00141	2024-07-29 21:00:00	Axilla/Groin	F36	PID00114	SRR33388532	SAMN48264917	Clade3	4	3.A.4.N
NV00142	2024-10-07	Wound	F38	PID03507	SRR33403261	SAMN48286649	Clade1	1	1.B.1.A	0.5	0.12		32	0.03	0.12	0.06	0.06	0.25		ERG11: Tyr132Phe
NV00143	2024-12-05	Wound	F39	PID03507	SRR33405799	SAMN48288195	Clade1	1	1.B.1.A	1	0.12		64	0.03	0.12	0.06	0.06	0.25		ERG11: Tyr132Phe
NV00144	2023-11-26 21:00:00	Axilla/Groin	F10	PID00116	SRR27645296	SAMN39504602	Clade1	5	1.B.5.A											ERG11: Tyr132Phe
NV00145	2024-01-19 21:00:00	Axilla/Groin	F36	PID00116	SRR29365082	SAMN41409224	Clade1	5	1.B.5.A											ERG11: Tyr132Phe
NV00146	2022-11-28 21:00:00	Not Indicated	F33	PID00117	SRR27135980	SAMN38336533	Clade3	10	3.A.10.E
NV00147	2023-02-27 21:00:00	Axilla/Groin	F33	PID00118	SRR27636416	SAMN35641102	Clade3	4	3.A.4.J
NV00148	2023-11-02 21:00:00	Axilla/Groin	F36	PID00119	SRR27607826	SAMN39273793	Clade3	13	3.A.13.E
NV00149	2023-11-02 21:00:00	Wound	F36	PID00119	SRR27607964	SAMN39273782	Clade3	13	3.A.13.E	0.5	0.5		256	0.25	0.5	0.5	0.25	2
NV00150	2024-06-02 21:00:00	Axilla/Groin	F36	PID00120	SRR30946395	SAMN44245424	Clade1	5	1.B.5.A											ERG11: Tyr132Phe
NV00151	2024-06-12 21:00:00	Axilla/Groin	F36	PID00120	SRR30946907	SAMN44246092	Clade1	5	1.B.5.A											ERG11: Tyr132Phe
NV00152	2024-06-12 21:00:00	Wound	F36	PID00120	SRR33391977	SAMN48270096	Clade1	5	1.B.5.A	1	0.25		64	0.03	0.06	0.12	0.03	0.25		ERG11: Tyr132Phe
NV00153	2024-06-12 21:00:00	Wound	F36	PID00120	SRR33391975	SAMN48270094	Clade1	5	1.B.5.A	1	0.25		128	0.06	0.25	0.25	0.12	0.5		ERG11: Tyr132Phe
NV00154	2023-05-07 21:00:00	Axilla/Groin	F33	PID00121	SRR27636238	SAMN35640881	Clade3	8	3.A.8.A
NV00155	2023-03-16 21:00:00	Axilla/Groin	F36	PID00122	SRR27636469	SAMN35641026	Clade3	12	3.A.12.B
NV00156	2024-09-25	Urine	F36	PID00123	SRR33403294	SAMN48286682	Clade1	3	1.B.3.A	0.5	0.25		64	0.03	0.12	0.12	0.06	0.25		ERG11: Tyr132Phe
NV00157	2023-04-09 21:00:00	Axilla/Groin	F28	PID00124	SRR27636332	SAMN35640977	Clade3	2	3.A.2.D
NV00158	2023-07-14 21:00:00	Axilla/Groin	F33	PID00126	SRR27135652	SAMN38336484	Clade3	6	3.A.6.G
NV00159	2024-07-30 21:00:00	Axilla/Groin	F20	PID00127	SRR33392035	SAMN48270122	Clade3	13	3.A.13.L
NV00160	2024-06-16 21:00:00	Axilla/Groin	F36	PID00128	SRR33370065	SAMN48199639	Clade1	13	1.A.13.F										FKS1: Met690Ile	ERG11: Lys143Arg	FUR1: Glu64*	B9J08_000401: Gln142*
NV00161	2024-06-30 21:00:00	Wound	F36	PID00128	SRR33381035	SAMN48209739	Clade1	13	1.A.13.F	0.25	1		>256	1	2	1	1	2	FKS1: Met690Ile	ERG11: Lys143Arg	FUR1: Glu64*	B9J08_000401: Gln142*
NV00162	2023-08-09 21:00:00	Axilla/Groin	F39	PID00129	SRR27130875	SAMN38336638	Clade3	11	3.A.11.A
NV00163	2024-09-20	Pleural Fluid	F39	PID00129	SRR33403355	SAMN48286713	Clade1	5	1.B.5.A	1	0.12		32	0.03	0.06	0.06	0.03	0.25		ERG11: Tyr132Phe
NV00164	2023-08-28 21:00:00	Blood	F39	PID00131	SRR27135613	SAMN38336326	Clade3	11	3.A.11.C
NV00165	2024-02-09 21:00:00	Urine	F36	PID00133	SRR29280566	SAMN41409381	Clade3	13	3.A.13.M
NV00166	2023-05-29 21:00:00	Urine	F39	PID00134	SRR27135718	SAMN38336393	Clade3	4	3.A.4.D	0.5	0.5	0.25	>256	0.12	0.25	0.5	0.12	2
NV00167	2023-01-25 21:00:00	Wound	F36	PID00135	SRR23920673	SAMN33829925	Clade3	8	3.A.8.D	0.25	1	0.25	256	0.12	0.5	0.5	0.25	4
NV00168	2023-03-11 21:00:00	Urine	F39	PID00132	SRR27636482	SAMN35641039	Clade3	13	3.A.13.H	0.5	0.5	0.25	256	0.12	0.5	0.5	0.25	2
NV00169	2023-08-21 21:00:00	Wound	F39	PID00132	SRR27130922	SAMN38336696	Clade3	13	3.A.13.H
NV00170	2023-04-28 21:00:00	Bronchial Lavage	F15	PID00134	SRR27636237	SAMN35640916	Clade3	4	3.A.4.D	0.5	0.25	0.12	>256	0.12	0.5		0.12	2
NV00171	2023-03-20 21:00:00	Urine	F39	PID00134	SRR27636357	SAMN35641009	Clade3	4	3.A.4.D	1	0.5	0.25	256	0.25	0.5	0.25	0.25	2
NV00172	2024-10-07	Wound	F38	PID03508	SRR33403262	SAMN48286650	Clade3	13	3.A.13.B	0.5	0.12		64	0.06	0.25	0.12	0.12	1
NV00173	2024-01-17 21:00:00	Axilla/Groin	F14	PID00136	SRR29365108	SAMN41409208	Clade1	11	1.A.11.C											ERG11: Lys143Arg		B9J08_000401: Gln142*
NV00174	2022-08-22 21:00:00	Axilla/Groin	F29	PID03440	SRR23109050	SAMN32670256	Clade3	8	3.A.8.C
NV00175	2022-06-01 21:00:00	Skin	F40	PID00138	SRR23958555	SAMN30468129	Clade3	10	3.A.10.G
NV00176	2022-07-04	Urine	F17	PID00138	SRR23958557	SAMN30468131	Clade3	10	3.A.10.G	0.5	0.5	0.12	256	0.25	0.5	0.5	0.25	2
NV00177	2022-04-20 21:00:00	Skin	F12	PID03371	SRR23958506	SAMN30468080	Clade3	2	3.A.2.D
NV00178	2023-05-22 21:00:00	Axilla/Groin	F33	PID00139	SRR27135821	SAMN38336479	Clade3	8	3.A.8.A
NV00179	2024-03-20 21:00:00	Axilla/Groin	F28	PID00140	SRR30945869	SAMN44244865	Clade3	6	3.A.6.D
NV00180	2024-02-20 21:00:00	Axilla/Groin	F35	PID00140	SRR29280456	SAMN41409442	Clade3	6	3.A.6.D
NV00181	2023-11-22 21:00:00	Axilla/Groin	F36	PID00141	SRR27718900	SAMN39600237	Clade3	13	3.A.13.F
NV00182	2022-09-20 21:00:00	Skin Swab	F40	PID00142	SRR23109155	SAMN32670147	Clade3	1	3.A.1.D
NV00183	2024-02-11 21:00:00	Axilla/Groin	F36	PID00142	SRR29280588	SAMN41409387	Clade3	13	3.A.13.K
NV00184	2024-07-29 21:00:00	Axilla/Groin	F13	PID00143	SRR33388542	SAMN48264927	Clade3	13	3.A.13.D												FUR1: Val103Gly
NV00185	2024-05-07 21:00:00	Wound	F38	PID00144	SRR30945902	SAMN44244898	Clade3	9	3.A.9.B	0.5	0.5		128	0.25	0.5	0.25	0.25	1
NV00186	2024-05-09 21:00:00	Axilla/Groin	F33	PID00145	SRR30945914	SAMN44244915	Clade1	10	1.A.10.B										FKS1: Leu1357Phe, Pro643Ala	ERG11: Lys143Arg		B9J08_000401: Gln142*
NV00187	2023-09-13 21:00:00	Axilla/Groin	F29	PID00145	SRR27645481	SAMN39504683	Clade3	4	3.A.4.G
NV00188	2024-03-06 21:00:00	Axilla/Groin	F33	PID00145	SRR30844140	SAMN43817389	Clade1	10	1.A.10.B											ERG11: Lys143Arg		B9J08_000401: Gln142*
NV00189	2024-04-22 21:00:00	Axilla/Groin	F36	PID00145	SRR30865461	SAMN43829909	Clade1	10	1.A.10.B											ERG11: Lys143Arg		B9J08_000401: Gln142*
NV00191	2023-12-20 21:00:00	Axilla/Groin	F39	PID00145	SRR28069393	SAMN40079084	Clade1	10	1.A.10.B											ERG11: Lys143Arg		B9J08_000401: Gln142*
NV00192	2024-02-02 21:00:00	Blood	F39	PID00145	SRR29280619	SAMN41409329	Clade3	10	3.A.10.E
NV00193	2024-05-09 21:00:00	Urine	F39	PID00145	SRR30946261	SAMN44245363	Clade1	10	1.A.10.B	0.5	8		256	0.5	0.5	8	0.25	1	FKS1: Leu1357Phe, Pro643Ala	ERG11: Lys143Arg		B9J08_000401: Gln142*
NV00194	2024-09-20	Wound	F39	PID00145	SRR33403357	SAMN48286715	Clade1	10	1.A.10.B	0.25	2		64	0.12	0.25	2	0.12	1	FKS1: Leu1357Phe, Pro643Ala	ERG11: Lys143Arg		B9J08_000401: Gln142*
NV00195	2024-07-28 21:00:00	Urine	F39	PID00145	SRR33391958	SAMN48270077	Clade1	10	1.A.10.B	0.5	0.5		>256	0.12	0.25	0.5	0.12	1	FKS1: Leu1357Phe, Pro643Ala	ERG11: Lys143Arg		B9J08_000401: Gln142*
NV00196	2024-02-29 21:00:00	Axilla/Groin	F13	PID00146	SRR29280485	SAMN41409493	Clade3	4	3.A.4.F
NV00197	2024-02-19 21:00:00	Axilla/Groin	F36	PID00146	SRR30844598	SAMN43817303	Clade3	4	3.A.4.F
NV00198	2024-02-22 21:00:00	Wound	F36	PID00146	SRR29280503	SAMN41409457	Clade3	10	3.A.10.A
NV00199	2024-03-30 21:00:00	Bronchial Lavage	F36	PID00146	SRR30865490	SAMN43829938	Clade3	4	3.A.4.F	0.5	0.5		>256	0.25	0.5	0.12	0.12	2
NV00200	2024-04-06 21:00:00	Axilla/Groin	F36	PID00148	SRR30847309	SAMN43830051	Clade3	13	3.A.13.I
NV00201	2024-04-14 21:00:00	Urine	F36	PID00148	SRR30868014	SAMN43829815	Clade3	13	3.A.13.I	0.5	0.25		256	0.12	0.25	0.12	0.12	1
NV00202	2024-10-10	Urine	F39	PID00148	SRR33403268	SAMN48286656	Clade3	13	3.A.13.I	0.5	0.5		64	0.12	0.25	0.25	0.25	1
NV00203	2021-12-09	Blood	F36	PID03350	SRR19738681	SAMN29101395	Clade3	5	3.A.5.E	0.5	0.5	0.25	256	0.12	0.5		0.12	4
NV00204	2022-02-22	Blood	F40	PID03375	SRR19738645	SAMN29101362	Clade1	5	1.A.5.C	0.5	1	1	>256	1	1	1	0.5	4		ERG11: Lys143Arg		B9J08_000401: Gln142*
NV00205	2024-02-15 21:00:00	Axilla/Groin	F33	PID00149	SRR29280542	SAMN41409416	Clade1	13	1.A.13.E											ERG11: Lys143Arg		B9J08_000401: Gln142*
NV00206	2023-07-27 21:00:00	Axilla/Groin	F39	PID00150	SRR27135700	SAMN38336483	Clade1	11	1.A.11.A											ERG11: Lys143Arg		B9J08_000401: Gln142*
NV00207	2023-12-31 21:00:00	Axilla/Groin	F36	PID00151	SRR29364661	SAMN41409109	Clade3	11	3.A.11.I
NV00208	2024-02-23 21:00:00	Axilla/Groin	F02	PID00153	SRR29280455	SAMN41409464	Clade1	3	1.B.3.A											ERG11: Tyr132Phe
NV00209	2024-01-15 21:00:00	Wound	F36	PID00153	SRR29365094	SAMN41409193	Clade1	3	1.B.3.A	1	0.12		128	0.12	0.5	0.12	0.12	0.5		ERG11: Tyr132Phe
NV00210	2023-12-24 21:00:00	Skin Swab	F38	PID00154	SRR29364656	SAMN41409076	Clade1	3	1.A.3.D	0.5	0.5		>256	0.5	0.5	0.25	0.25	2		ERG11: Lys143Arg		B9J08_000401: Gln142*
NV00211	2022-10-30 21:00:00	Skin Swab	F38	PID00155	SRR23108854	SAMN32669992	Clade3	5	3.A.5.E	0.5	0.5	0.25	256	0.25	0.5		0.25	2
NV00212	2023-03-01 21:00:00	Blood	F38	PID00155	SRR27636401	SAMN35641087	Clade3	2	3.A.2.D	1	0.5	1	256	0.12	0.25	0.5	0.12	1
NV00213	2023-09-28 21:00:00	Blood	F38	PID00155	SRR27645324	SAMN39504795	Clade3	5	3.A.5.F	0.5	0.5	0.5	>256	0.5	1	1	1	1
NV00214	2022-10-27 21:00:00	Skin Swab	F38	PID00155	SRR23108858	SAMN32669996	Clade3	5	3.A.5.E	0.5	0.5	0.25	128	0.25	0.5		0.25	2
NV00215	2023-01-23 21:00:00	Axilla/Groin	F39	PID00158	SRR23920634	SAMN33829875	Clade3	4	3.A.4.F
NV00216	2023-02-25 21:00:00	Blood	F39	PID00158	SRR27636409	SAMN35641095	Clade1	2	1.A.2.I	0.5	0.25	0.25	256	0.5	0.5	0.25	0.25	1		ERG11: Lys143Arg		B9J08_000401: Gln142*
NV00217	2023-02-28 21:00:00	Catheter Tip	F39	PID00158	SRR27636400	SAMN35641086	Clade1	2	1.A.2.I	0.5	0.25	0.12	256	0.5	0.5	0.12	0.25	1		ERG11: Lys143Arg		B9J08_000401: Gln142*
NV00218	2023-06-04 21:00:00	Axilla/Groin	F34	PID00158	SRR27135939	SAMN38336299	Clade1	2	1.A.2.I											ERG11: Lys143Arg		B9J08_000401: Gln142*
NV00219	2023-09-26 21:00:00	Axilla/Groin	F28	PID00160	SRR27607987	SAMN39273901	Clade1	13	1.A.13.A											ERG11: Lys143Arg		B9J08_000401: Gln142*
NV00220	2023-07-07 21:00:00	Axilla/Groin	F39	PID00161	SRR27135666	SAMN38336332	Clade3	11	3.A.11.H
NV00221	2023-07-19	Axilla/Groin	F12	PID03441	SRR27130881	SAMN38336711	Clade3	8	3.A.8.A
NV00222	2022-10-26 21:00:00	Wound	F05	PID00165	SRR23108856	SAMN32669994	Clade3	5	3.A.5.E
NV00223	2024-12-15	Blood	F36	PID03509	SRR33405916	SAMN48288165	Clade3	6	3.A.6.G	1	0.25		256	0.12	0.25	0.25	0.12	1
NV00224	2023-11-20 21:00:00	Axilla/Groin	F12	PID00167	SRR27718905	SAMN39600299	Clade1	4	1.A.4.E											ERG11: Lys143Arg		B9J08_000401: Gln142*
NV00225	2023-12-16 21:00:00	Axilla/Groin	F12	PID00167	SRR28069427	SAMN40079057	Clade1	4	1.A.4.E											ERG11: Lys143Arg		B9J08_000401: Gln142*
NV00226	2024-05-14 21:00:00	Axilla/Groin	F12	PID00167	SRR30946251	SAMN44245353	Clade1	4	1.A.4.E											ERG11: Lys143Arg		B9J08_000401: Gln142*
NV00228	2023-11-22 21:00:00	Axilla/Groin	F36	PID00167	SRR27718898	SAMN39600298	Clade1	4	1.A.4.E											ERG11: Lys143Arg		B9J08_000401: Gln142*
NV00229	2023-11-21 21:00:00	Axilla/Groin	F36	PID00167	SRR27645307	SAMN39504621	Clade1	4	1.A.4.E											ERG11: Lys143Arg		B9J08_000401: Gln142*
NV00231	2023-02-18 21:00:00	Axilla/Groin	F10	PID00172	SRR27636507	SAMN35641128	Clade3	4	3.A.4.J
NV00232	2022-12-03 21:00:00	Axilla/Groin	F33	PID00172	SRR23137788	SAMN32797895	Clade3	3	3.A.3.H
NV00233	2022-11-19 21:00:00	Urine	F41	PID00174	SRR23108791	SAMN32669961	Clade1	3	1.A.3.C	0.5	0.5	0.25	>256	2	1	0.25	0.5	4		ERG11: Lys143Arg
NV00234	2021-12-09	Blood	F36	PID03383	SRR19738682	SAMN29101396	Clade3	7	3.A.7.A
NV00235	2024-11-08	Trachea	F38	PID03510	SRR33405856	SAMN48288252	Clade1	5	1.B.5.A											ERG11: Tyr132Phe
NV00236	2024-11-17	Urine	F38	PID03510	SRR33405836	SAMN48288232	Clade1	5	1.B.5.A	1	1		128	0.12	1	0.25	0.25	1		ERG11: Tyr132Phe
NV00237	2024-11-25	Wound	F38	PID03510	SRR33405809	SAMN48288205	Clade1	5	1.B.5.A	0.5	0.25		64	0.06	0.25	0.06	0.12	0.25		ERG11: Tyr132Phe
NV00238	2023-06-22 21:00:00	Axilla/Groin	F02	PID00177	SRR27135911	SAMN38336286	Clade3	4	3.A.4.K
NV00239	2022-08-30 21:00:00	Skin Swab	F41	PID00179	SRR23109028	SAMN32670234	Clade3	4	3.A.4.F	0.25	0.5	0.25	128	0.12	0.25		0.12	1
NV00240	2023-12-12 21:00:00	Axilla/Groin	F28	PID00180	SRR28069459	SAMN40079121	Clade1	4	1.A.4.A											ERG11: Lys143Arg		B9J08_000401: Gln142*
NV00241	2024-05-30 21:00:00	Axilla/Groin	F36	PID00181	SRR30946460	SAMN44245612	Clade3	13	3.A.13.L
NV00242	2023-08-06 21:00:00	Axilla/Groin	F33	PID00182	SRR27135675	SAMN38336418	Clade3	4	3.A.4.D
NV00243	2024-03-18 21:00:00	Axilla/Groin	F16	PID00183	SRR30846279	SAMN43830232	Clade1	2	1.A.2.B											ERG11: Lys143Arg		B9J08_000401: Gln142*
NV00244	2024-01-14 21:00:00	Axilla/Groin	F36	PID00183	SRR29365134	SAMN41409187	Clade3	4	3.A.4.J
NV00245	2024-02-24 21:00:00	Urine	F39	PID00184	SRR29280495	SAMN41409467	Clade3	13	3.A.13.D												FUR1: Val103Gly
NV00246	2023-09-18 21:00:00	Skin Swab	F25	PID00186	SRR27645420	SAMN39504708	Clade1	11	1.A.11.B	0.25	1	1	>256	1	2	0.5	1	2		ERG11: Lys143Arg		B9J08_000401: Gln142*
NV00248	2023-05-31 21:00:00	Trachea	F36	PID00188	SRR27130996	SAMN38336726	Clade1	11	1.A.11.A	0.25	0.5	0.5	>256	2	0.5	0.25	0.25	4		ERG11: Lys143Arg		B9J08_000401: Gln142*
NV00249	2023-06-04 21:00:00	Axilla/Groin	F34	PID00189	SRR27130995	SAMN38336669	Clade3	4	3.A.4.G
NV00250	2023-04-15 21:00:00	Axilla/Groin	F39	PID00189	SRR27636454	SAMN35640894	Clade3	4	3.A.4.G
NV00251	2023-04-14 21:00:00	Axilla/Groin	F39	PID00189	SRR27636453	SAMN35640917	Clade3	4	3.A.4.G
NV00252	2023-06-11 21:00:00	Catheter Tip	F38	PID00190	SRR27135802	SAMN38336391	Clade1	11	1.A.11.C	0.5	0.5	0.25	>256	0.25	0.25		0.12	1		ERG11: Lys143Arg		B9J08_000401: Gln142*
NV00253	2024-03-21 21:00:00	Axilla/Groin	F33	PID00191	SRR30846252	SAMN43830205	Clade3	11	3.A.11.F
NV00254	2023-02-08 21:00:00	Blood	F36	PID00193	SRR23920655	SAMN33829910	Clade3	5	3.A.5.E	0.5	0.5	0.5	256	1	1	0.5	0.5	4
NV00255	2023-02-07 21:00:00	Blood	F36	PID00193	SRR23920656	SAMN33829911	Clade3	5	3.A.5.E	0.5	1	0.25	128	0.5	0.5	0.5	0.25	4
NV00256	2023-08-12 21:00:00	Surgery Culture	F36	PID00195	SRR27135866	SAMN38336751	Clade3	13	3.A.13.K	1	0.25	0.12	>256	0.25	0.25	0.25	0.12	2
NV00257	2023-11-14 21:00:00	Axilla/Groin	F36	PID00195	SRR27645366	SAMN39504637	Clade3	13	3.A.13.K
NV00258	2023-06-28 21:00:00	Axilla/Groin	F39	PID00196	SRR27130944	SAMN38336684	Clade1	4	1.A.4.A											ERG11: Lys143Arg		B9J08_000401: Gln142*
NV00259	2023-09-20 21:00:00	Wound	F36	PID00197	SRR27645339	SAMN39504682	Clade3	4	3.A.4.F	0.5	0.5	0.25	>256	0.25	0.5	0.5	0.25	1
NV00260	2024-05-17 21:00:00	Axilla/Groin	F30	PID00199	SRR30946507	SAMN44245659	Clade1	1	1.B.1.A											ERG11: Tyr132Phe
NV00261	2022-08-10 21:00:00	Tissue	F38	PID00200	SRR23109203	SAMN32670323	Clade3	12	3.A.12.D	0.5	0.06	0.06	256	0.06	0.12	0.06	0.03	1
NV00262	2022-08-10 21:00:00	Tissue	F38	PID00200	SRR23109202	SAMN32670322	Clade3	12	3.A.12.D
NV00263	2022-10-04 21:00:00	Skin Swab	F40	PID00200	SRR23108822	SAMN32670088	Clade3	12	3.A.12.D
NV00264	2022-10-04 21:00:00	Skin Swab	F40	PID00200	SRR23108821	SAMN32670087	Clade3	12	3.A.12.D	0.25	0.06	0.03	128	0.03	0.06	0.06	0.03	2
NV00265	2022-06-07 21:00:00	Skin	F40	PID00202	SRR23958552	SAMN30468126	Clade3	5	3.A.5.E
NV00266	2023-09-04 21:00:00	Skin Swab	F36	PID00204	SRR27135756	SAMN38336252	Clade1	13	1.A.13.C	0.5	2	0.5	>256	0.5	0.5	0.5	0.12	2	FKS1: Asp642Tyr	ERG11: Lys143Arg		B9J08_000401: Gln142*
NV00267	2023-04-02 21:00:00	Urine	F39	PID00205	SRR27636263	SAMN35640846	Clade1	3	1.A.3.D											ERG11: Lys143Arg		B9J08_000401: Gln142*
NV00268	2023-06-11 21:00:00	Axilla/Groin	F10	PID00206	SRR27130984	SAMN38336667	Clade3	4	3.A.4.J
NV00269	2022-10-22 21:00:00	Axilla/Groin	F10	PID00207	SRR23108771	SAMN32670018	Clade3	12	3.A.12.D
NV00270	2024-02-20 21:00:00	Urine	F38	PID00209	SRR29280520	SAMN41409447	Clade3	13	3.A.13.D												FUR1: Val103Gly
NV00271	2023-04-10 21:00:00	Axilla/Groin	F25	PID00210	SRR27636317	SAMN35640898	Clade3	4	3.A.4.K
NV00272	2023-03-05 21:00:00	Axilla/Groin	F10	PID00212	SRR27636390	SAMN35641076	Clade1	4	1.A.4.C											ERG11: Lys143Arg		B9J08_000401: Gln142*
NV00273	2024-04-17 21:00:00	Axilla/Groin	F23	PID00213	SRR30868013	SAMN43829814	Clade1	2	1.B.2.A											ERG11: Tyr132Phe
NV00274	2022-10-24 21:00:00	Blood	F41	PID00214	SRR23108861	SAMN32669999	Clade3	4	3.A.4.J	0.5	0.5	0.25	256	0.12	0.5		0.25	2
NV00275	2024-09-24	Wound	F36	PID03511	SRR33403292	SAMN48286680	Clade1	4	1.A.4.D	0.5	0.5		64	0.25	0.5	0.25	0.25	1		ERG11: Lys143Arg		B9J08_000401: Gln142*
NV00276	2023-03-30 21:00:00	Surgery Culture	F36	PID00216	SRR27636325	SAMN35640868	Clade3	4	3.A.4.G
NV00277	2023-09-23 21:00:00	Bone	F36	PID00217	SRR27645340	SAMN39504724	Clade3	11	3.A.11.G	0.5	0.5	0.5	>256	0.12	0.5	0.25	0.12	1
NV00278	2023-09-21 21:00:00	Axilla/Groin	F36	PID00217	SRR27645337	SAMN39504832	Clade3	11	3.A.11.G
NV00279	2024-06-24 21:00:00	Axilla/Groin	F02	PID00219	SRR33369986	SAMN48199573	Clade1	3	1.A.3.B											ERG11: Lys143Arg		B9J08_000401: Gln142*
NV00280	2023-10-24 21:00:00	Urine	F36	PID00220	SRR27645246	SAMN39504861	Clade3	5	3.A.5.E	0.5	0.25		>256	0.12	0.25	0.12	0.06	2
NV00281	2024-02-19 21:00:00	Axilla/Groin	F36	PID00220	SRR30844604	SAMN43817309	Clade3	5	3.A.5.E
NV00282	2024-10-12	Blood	F36	PID00220	SRR33403321	SAMN48286621	Clade3	12	3.A.12.G	1	0.5		>256	0.25	0.25	0.25	0.25	2
NV00283	2024-10-13	Wound	F36	PID00220	SRR33403230	SAMN48286590	Clade3	12	3.A.12.G	0.5	0.25		256	0.12	0.5	0.12	0.12	2
NV00284	2024-11-25	Wound	F36	PID00220	SRR33405818	SAMN48288214	Clade3	12	3.A.12.G	0.25	0.25		256	0.25	0.5	0.12	0.12	1
NV00285	2023-03-11 21:00:00	Blood	F36	PID00221	SRR27636475	SAMN35641032	Clade3	6	3.A.6.E	0.5	1	0.25	256	0.25	0.5	0.25	0.25	2
NV00286	2023-10-09 21:00:00	Axilla/Groin	F36	PID00222	SRR27645259	SAMN39504880	Clade1	1	1.B.1.A											ERG11: Tyr132Phe
NV00287	2023-10-31 21:00:00	Axilla/Groin	F36	PID00222	SRR27645241	SAMN39504626	Clade3	13	3.A.13.G
NV00288	2023-01-15 21:00:00	Trachea	F36	PID00223	SRR23920686	SAMN33829933	Clade3	5	3.A.5.E	0.5	0.25	0.06	64	0.12	0.25	0.12	0.12	4
NV00289	2023-03-24 21:00:00	Axilla/Groin	F10	PID00224	SRR27636349	SAMN35641002	Clade3	5	3.A.5.E
NV00290	2023-12-05 21:00:00	Urine	F38	PID00226	SRR27645512	SAMN39504662	Clade1	12	1.A.12.C	0.5	1		256	4	2	0.5	0.5	4		ERG11: Lys143Arg	FUR1: Arg101Leu	B9J08_000401: Gln142*
NV00291	2023-12-11 21:00:00	Axilla/Groin	F39	PID00226	SRR27718939	SAMN39600287	Clade1	12	1.A.12.C											ERG11: Lys143Arg	FUR1: Arg101Leu	B9J08_000401: Gln142*
NV00292	2023-12-11 21:00:00	Blood	F39	PID00226	SRR27718924	SAMN39600285	Clade1	12	1.A.12.C	0.5	0.5		>256	0.5	1	0.25	0.5	1		ERG11: Lys143Arg	FUR1: Arg101Leu	B9J08_000401: Gln142*
NV00293	2023-03-09 21:00:00	Axilla/Groin	F29	PID00227	SRR27636487	SAMN35641044	Clade1	3	1.B.3.A											ERG11: Tyr132Phe
NV00294	2024-04-28 21:00:00	Axilla/Groin	F29	PID00227	SRR30946519	SAMN44245671	Clade3	3	3.A.3.K
NV00295	2024-04-28 21:00:00	Axilla/Groin	F29	PID00227	SRR30946518	SAMN44245670	Clade1	3	1.A.3.D											ERG11: Lys143Arg		B9J08_000401: Gln142*
NV00296	2024-06-25 21:00:00	Axilla/Groin	F30	PID00229	SRR33369985	SAMN48199572	Clade3	10	3.A.10.F
NV00297	2024-06-25 21:00:00	Wound	F36	PID00229	SRR33381067	SAMN48209799	Clade3	10	3.A.10.F	0.5	0.5		>256	0.25	0.5	0.25	0.25	2
NV00298	2024-05-28 21:00:00	Axilla/Groin	F09	PID00231	SRR30946378	SAMN44245407	Clade1	11	1.A.11.C											ERG11: Lys143Arg		B9J08_000401: Gln142*
NV00299	2024-06-10 21:00:00	Axilla/Groin	F13	PID00232	SRR30946914	SAMN44246099	Clade3	10	3.A.10.E
NV00300	2022-04-20 21:00:00	Skin	F12	PID03372	SRR23958505	SAMN30468079	Clade3	7	3.A.7.A
NV00301	2023-01-10 21:00:00	Axilla/Groin	F12	PID00233	SRR23920754	SAMN33829989	Clade3	4	3.A.4.J
NV00302	2023-10-07 21:00:00	Axilla/Groin	F36	PID00234	SRR27607973	SAMN39273887	Clade3	1	3.A.1.D
NV00303	2023-06-29 21:00:00	Wound	F38	PID00234	SRR27135894	SAMN38336422	Clade3	1	3.A.1.D	0.5	0.5	0.5	256	0.12	0.25		0.12	1
NV00304	2023-08-10 21:00:00	Wound	F38	PID00234	SRR27135871	SAMN38336769	Clade3	1	3.A.1.D	1	1	0.25	>256	0.25	0.5	0.5	0.25	4
NV00305	2024-06-29 21:00:00	Axilla/Groin	F36	PID00235	SRR33370002	SAMN48199548	Clade3	8	3.A.8.A
NV00306	2023-07-30 21:00:00	Axilla/Groin	F33	PID00236	SRR27130886	SAMN38336595	Clade1	13	1.A.13.A											ERG11: Lys143Arg		B9J08_000401: Gln142*
NV00307	2022-05-05 21:00:00	Axilla/Groin	F12	PID03384	SRR23958495	SAMN30468069	Clade3	4	3.A.4.B
NV00308	2022-04-20 21:00:00	Skin	F12	PID03370	SRR23958507	SAMN30468081	Clade3	2	3.A.2.D
NV00309	2024-01-10 21:00:00	Axilla/Groin	F36	PID00237	SRR29364614	SAMN41409154	Clade3	13	3.A.13.H
NV00310	2023-07-25 21:00:00	Axilla/Groin	F30	PID00238	SRR27130889	SAMN38336745	Clade1	13	1.A.13.F											ERG11: Lys143Arg	FUR1: Glu64*	B9J08_000401: Gln142*
NV00311	2023-11-09 21:00:00	Catheter Tip	F39	PID00239	SRR27607949	SAMN39273767	Clade1	13	1.A.13.E	0.5	0.25		256	0.5	0.5	0.25	0.25	1		ERG11: Lys143Arg		B9J08_000401: Gln142*
NV00312	2024-12-02	Wound	F36	PID03512	SRR33405808	SAMN48288204	Clade1	1	1.B.1.A	0.5	0.06		16	0.03	0.12	0.03	0.06	0.25		ERG11: Tyr132Phe
NV00313	2022-10-06 21:00:00	Urine	F31	PID00240	SRR23108785	SAMN32670032	Clade3	12	3.A.12.D
NV00314	2022-08-22 21:00:00	Axilla/Groin	F29	PID03438	SRR23109052	SAMN32670258	Clade3	3	3.A.3.D
NV00315	2024-10-19	Urine	F36	PID03513	SRR33403323	SAMN48286623	Clade1	12	1.A.12.C	0.5	0.5		>256	0.25	0.5	0.5	0.25	2		ERG11: Lys143Arg	FUR1: Arg101Leu	B9J08_000401: Gln142*
NV00316	2024-11-20	Urine	F36	PID03513	SRR33405833	SAMN48288229	Clade1	12	1.A.12.C	0.5	0.03		32	0.06	0.06	0.03	0.12	0.25		ERG11: Lys143Arg	FUR1: Arg101Leu	B9J08_000401: Gln142*
NV00317	2023-06-26 21:00:00	Axilla/Groin	F30	PID00241	SRR27135904	SAMN38336520	Clade3	4	3.A.4.D
NV00318	2024-01-24 21:00:00	Axilla/Groin	F39	PID00243	SRR29364005	SAMN41409269	Clade1	1	1.B.1.A											ERG11: Tyr132Phe
NV00319	2023-11-13 21:00:00	Axilla/Groin	F36	PID00244	SRR27718913	SAMN39600252	Clade3	12	3.A.12.D
NV00320	2023-12-23 21:00:00	Axilla/Groin	F36	PID00246	SRR28069438	SAMN40079068	Clade3	13	3.A.13.M
NV00321	2024-01-10 21:00:00	Trachea	F36	PID00246	SRR29365129	SAMN41409161	Clade3	4	3.A.4.J	0.5	0.5		>256	0.12	0.25	0.12	0.06	2
NV00322	2024-03-24 21:00:00	Axilla/Groin	F13	PID00245	SRR30847396	SAMN43830138	Clade3	13	3.A.13.E
NV00323	2024-03-24 21:00:00	Axilla/Groin	F13	PID00245	SRR30847395	SAMN43830137	Clade3	13	3.A.13.E										FKS1: Asp642Val
NV00324	2024-01-25 21:00:00	Axilla/Groin	F30	PID00247	SRR30844170	SAMN43817418	Clade3	4	3.A.4.O
NV00325	2024-03-22 21:00:00	Axilla/Groin	F30	PID00247	SRR30847433	SAMN43830158	Clade3	4	3.A.4.K
NV00326	2023-04-25 21:00:00	Skin Swab	F36	PID00248	SRR27636291	SAMN35640937	Clade3	4	3.A.4.P	0.5	0.03	0.06	>256	0.25	0.5	0.12	0.25	1
NV00327	2023-12-29 21:00:00	Axilla/Groin	F39	PID00249	SRR29364665	SAMN41409104	Clade3	6	3.A.6.A
NV00328	2023-12-28 21:00:00	Axilla/Groin	F39	PID00249	SRR29364662	SAMN41409101	Clade3	6	3.A.6.A
NV00329	2023-05-08 21:00:00	Axilla/Groin	F36	PID00250	SRR27636232	SAMN35640847	Clade3	11	3.A.11.J
NV00330	2024-04-16 21:00:00	Axilla/Groin	F36	PID00250	SRR30865504	SAMN43829952	Clade3	11	3.A.11.J
NV00331	2024-04-15 21:00:00	Wound	F36	PID00250	SRR30866630	SAMN43829900	Clade3	11	3.A.11.J	0.5	0.25		>256	0.12	0.25	0.12	0.12	2
NV00332	2024-04-18 21:00:00	Axilla/Groin	F12	PID00252	SRR30865466	SAMN43829914	Clade3	13	3.A.13.J
NV00333	2023-04-05 21:00:00	Axilla/Groin	F39	PID00253	SRR27636255	SAMN35640926	Clade1	3	1.A.3.A											ERG11: Lys143Arg	FUR1: Gly106Asp	B9J08_000401: Gln142*
NV00334	2024-04-28 21:00:00	Axilla/Groin	F39	PID00254	SRR30867993	SAMN43829794	Clade1	12	1.A.12.C											ERG11: Lys143Arg	FUR1: Arg101Leu	B9J08_000401: Gln142*
NV00335	2023-09-28 21:00:00	Axilla/Groin	F29	PID00255	SRR27645320	SAMN39504839	Clade3	12	3.A.12.G
NV00336	2023-11-17 21:00:00	Axilla/Groin	F36	PID00256	SRR27645353	SAMN39504625	Clade1	4	1.B.4.A											ERG11: Tyr132Phe
NV00337	2023-10-15 21:00:00	Axilla/Groin	F35	PID00257	SRR27607922	SAMN39273868	Clade1	11	1.A.11.A											ERG11: Lys143Arg		B9J08_000401: Gln142*
NV00338	2024-06-01 21:00:00	Axilla/Groin	F39	PID00258	SRR30946400	SAMN44245429	Clade1	2	1.A.2.B											ERG11: Lys143Arg		B9J08_000401: Gln142*
NV00339	2024-03-06 21:00:00	Axilla/Groin	F39	PID00261	SRR29278642	SAMN41409518	Clade3	13	3.A.13.K
NV00340	2023-07-28 21:00:00	Axilla/Groin	F35	PID00263	SRR27135704	SAMN38336541	Clade1	4	1.A.4.A											ERG11: Lys143Arg		B9J08_000401: Gln142*
NV00341	2022-04-20 21:00:00	Skin	F12	PID03369	SRR23958508	SAMN30468082	Clade3	4	3.A.4.E
NV00342	2023-06-01 21:00:00	Axilla/Groin	F12	PID00265	SRR27135947	SAMN38336567	Clade3	3	3.A.3.F
NV00343	2023-08-06 21:00:00	Axilla/Groin	F12	PID00265	SRR27135882	SAMN38336397	Clade3	3	3.A.3.F
NV00344	2024-02-18 21:00:00	Axilla/Groin	F33	PID00267	SRR30844613	SAMN43817318	Clade3	13	3.A.13.M
NV00345	2024-02-16 21:00:00	Axilla/Groin	F10	PID00268	SRR29280547	SAMN41409424	Clade3	9	3.A.9.C
NV00346	2023-03-20 21:00:00	Blood	F36	PID00269	SRR27636343	SAMN35640998	Clade3	9	3.A.9.A	1	1	1	256	0.25	0.5	0.25	0.12	4
NV00347	2022-10-26 21:00:00	Urine	F41	PID00270	SRR23108848	SAMN32669986	Clade1	4	1.A.4.B	0.25	1	0.5	128	0.25	0.5		0.25	1		ERG11: Lys143Arg		B9J08_000401: Gln142*
NV00348	2023-06-06 21:00:00	Trachea	F36	PID00271	SRR27135927	SAMN38336414	Clade3	13	3.A.13.D	0.5	0.5	0.12	256	0.12	0.25		0.12	2			FUR1: Val103Gly
NV00349	2023-06-29 21:00:00	Blood	F36	PID00271	SRR27130939	SAMN38336598	Clade3	13	3.A.13.C	0.5	0.5	0.5	256	0.12	0.25		0.06	1			FUR1: Val103Gly
NV00350	2024-03-11 21:00:00	Urine	F38	PID00274	SRR30846338	SAMN43830188	Clade3	11	3.A.11.C	0.5	0.25		256	0.25	0.25	0.25	0.12	1
NV00351	2023-08-20 21:00:00	Axilla/Groin	F29	PID00273	SRR27135859	SAMN38336271	Clade1	2	1.B.2.A
NV00352	2023-09-11 21:00:00	Axilla/Groin	F29	PID00275	SRR27645491	SAMN39504745	Clade1	13	1.A.13.D											ERG11: Lys143Arg	FUR1: Gln16*	B9J08_000401: Gln142*
NV00353	2022-01-21	Sputum	F39	PID03408	SRR19738667	SAMN29101382	Clade3	8	3.A.8.E
NV00354	2022-02-05	Urine	F40	PID03408	SRR19738654	SAMN29101370	Clade3	8	3.A.8.E	0.5	0.5	0.25	128	0.25	0.12	0.25	0.06	1
NV00355	2022-09-20 21:00:00	Skin Swab	F40	PID00280	SRR23920646	SAMN33829867	Clade3	7	3.A.7.D
NV00356	2023-02-26 21:00:00	Axilla/Groin	F39	PID00282	SRR27636414	SAMN35641100	Clade3	3	3.A.3.H
NV00357	2023-03-28 21:00:00	Axilla/Groin	F39	PID00282	SRR27636272	SAMN35640922	Clade1	3	1.A.3.D											ERG11: Lys143Arg		B9J08_000401: Gln142*
NV00358	2024-01-09 21:00:00	Wound	F36	PID00283	SRR29364608	SAMN41409151	Clade1	4	1.A.4.D	0.25	0.5		>256	0.5	0.25	0.25	0.25	2		ERG11: Lys143Arg		B9J08_000401: Gln142*
NV00359	2024-06-21 21:00:00	Axilla/Groin	F36	PID00286	SRR33370037	SAMN48199611	Clade1	4	1.A.4.D											ERG11: Lys143Arg		B9J08_000401: Gln142*
NV00360	2024-07-23 21:00:00	Axilla/Groin	F36	PID00286	SRR30947143	SAMN44246237	Clade1	4	1.A.4.D											ERG11: Lys143Arg		B9J08_000401: Gln142*
NV00361	2024-05-11 21:00:00	Axilla/Groin	F33	PID00287	SRR30945913	SAMN44244909	Clade3	5	3.A.5.B
NV00362	2024-05-12 21:00:00	Axilla/Groin	F33	PID00287	SRR30945899	SAMN44244895	Clade3	5	3.A.5.B
NV00363	2022-08-19 21:00:00	Blood	F36	PID00288	SRR23109071	SAMN32670277	Clade3	2	3.A.2.C
NV00364	2022-08-22 21:00:00	Skin Swab	F36	PID00288	SRR23109066	SAMN32670272	Clade3	2	3.A.2.C	0.5	0.5	0.25	256	0.12	0.12		0.06	1
NV00365	2024-06-18 21:00:00	Urine	F39	PID00289	SRR33370015	SAMN48199589	Clade1	3	1.B.3.A	0.5	0.25		128	0.06	0.25	0.25	0.12	1		ERG11: Tyr132Phe
NV00366	2024-06-19 21:00:00	Catheter Tip	F39	PID00289	SRR30947165	SAMN44246257	Clade1	3	1.B.3.A	0.25	0.25		128	0.06	0.25	0.25	0.06	0.5		ERG11: Tyr132Phe
NV00367	2022-09-03 21:00:00	Blood	F41	PID00291	SRR23109174	SAMN32670198	Clade3	2	3.A.2.D	0.5	0.12	0.12	32	0.12	0.25		0.12	0.25
NV00368	2022-10-03 21:00:00	Wound	F41	PID00291	SRR23108918	SAMN32670056	Clade3	4	3.A.4.B	0.5	0.5	0.25	256	0.12	0.25	0.25	0.12	2
NV00369	2024-05-22 21:00:00	Not Indicated	F15	PID00292	SRR30946960	SAMN44246145	Clade3	2	3.A.2.B	0.5	0.5		256	0.12	0.12	0.25	0.12	1
NV00370	2022-10-21 21:00:00	Catheter Tip	F30	PID00294	SRR23108862	SAMN32670000	Clade1	3	1.A.3.A	0.25	0.5	1	>256	0.5	1		0.5	4		ERG11: Lys143Arg	FUR1: Gly106Asp	B9J08_000401: Gln142*
NV00371	2022-10-18 21:00:00	Urine	F36	PID00294	SRR23108772	SAMN32670019	Clade1	3	1.A.3.A	0.25	0.5	0.12	>256	0.5	0.5	0.25	0.25	2		ERG11: Lys143Arg	FUR1: Gly106Asp	B9J08_000401: Gln142*
NV00372	2022-04-20 21:00:00	Skin	F12	PID03379	SRR23958500	SAMN30468074	Clade1	4	1.A.4.B											ERG11: Lys143Arg		B9J08_000401: Gln142*
NV00373	2023-03-10 21:00:00	Axilla/Groin	F10	PID00298	SRR27636495	SAMN35641052	Clade3	3	3.A.3.L
NV00374	2024-08-01 21:00:00	Axilla/Groin	F36	PID00299	SRR33392001	SAMN48270119	Clade1	11	1.A.11.B											ERG11: Lys143Arg		B9J08_000401: Gln142*
NV00375	2024-07-31 21:00:00	Blood	F36	PID00299	SRR33391967	SAMN48270086	Clade1	5	1.B.5.A	1	0.25		>256	1	1	0.25	1	2		ERG11: Tyr132Phe			B9J08_003737: Thr196Ile
NV00376	2023-10-23 21:00:00	Axilla/Groin	F12	PID00300	SRR27607853	SAMN39273820	Clade3	4	3.A.4.J
NV00377	2023-03-05 21:00:00	Axilla/Groin	F34	PID00301	SRR27636394	SAMN35641080	Clade3	4	3.A.4.C
NV00378	2024-06-11 21:00:00	Axilla/Groin	F36	PID00302	SRR33345028	SAMN48181666	Clade1	8	1.A.8.A											ERG11: Lys143Arg		B9J08_000401: Gln142*
NV00379	2022-06-24	Wound	F31	PID03514	SRR23109136	SAMN32670374	Clade3	6	3.A.6.D	1	0.5	0.25	256	0.25	0.5	0.25	0.25	1
NV00380	2022-09-10 21:00:00	Urine	F36	PID00305	SRR23137886	SAMN32797991	Clade3	4	3.A.4.B	0.5	0.25	0.12	256	0.12	0.25		0.12	1
NV00381	2023-04-25 21:00:00	Axilla/Groin	F33	PID00306	SRR27636302	SAMN35640903	Clade3	5	3.A.5.E
NV00382	2024-02-27 21:00:00	Urine	F01	PID00309	SRR29280486	SAMN41409481	Clade3	6	3.A.6.B	0.25	0.25		256	0.12	0.25	0.12	0.06	2
NV00383	2024-09-07 21:00:00	Urine	F01	PID00309	SRR33391938	SAMN48270028	Clade3	6	3.A.6.B	2	1		128	0.12	0.25	0.5	0.12	2
NV00384	2024-05-30 21:00:00	Bone	F15	PID00309	SRR30946963	SAMN44246148	Clade3	6	3.A.6.B	1	0.5		256	0.25	0.25	0.25	0.25	2
NV00385	2024-09-02 21:00:00	Urine	F15	PID00309	SRR33391930	SAMN48270020	Clade3	6	3.A.6.B	1	1		128	0.25	0.25	0.25	0.12	2
NV00386	2023-06-20 21:00:00	Axilla/Groin	F10	PID00311	SRR27130967	SAMN38336641	Clade3	3	3.A.3.B
NV00387	2024-02-25 21:00:00	Axilla/Groin	F36	PID00312	SRR29280532	SAMN41409476	Clade3	10	3.A.10.F
NV00388	2024-11-01	Urine	F36	PID03515	SRR33405899	SAMN48288270	Clade1	5	1.B.5.A	1	0.25		128	0.06	0.5	0.25	0.25	0.5		ERG11: Tyr132Phe
NV00389	2022-11-16 21:00:00	Axilla/Groin	F02	PID00313	SRR23108834	SAMN32669972	Clade1	13	1.A.13.C										FKS1: Asp642Tyr	ERG11: Lys143Arg
NV00390	2022-11-16 21:00:00	Urine	F41	PID00313	SRR23108795	SAMN32669965	Clade1	13	1.A.13.C	0.12	2	0.5	>256	1	1	1	0.25	4	FKS1: Asp642Tyr	ERG11: Lys143Arg		B9J08_000401: Gln142*
NV00391	2024-04-03 21:00:00	Axilla/Groin	F12	PID00314	SRR30946515	SAMN44245667	Clade1	8	1.A.8.A											ERG11: Lys143Arg		B9J08_000401: Gln142*
NV00392	2024-03-31 21:00:00	Axilla/Groin	F39	PID00314	SRR30847339	SAMN43830081	Clade1	8	1.A.8.A											ERG11: Lys143Arg		B9J08_000401: Gln142*
NV00393	2023-11-05 21:00:00	Axilla/Groin	F33	PID00315	SRR27607817	SAMN39273784	Clade3	4	3.A.4.J
NV00394	2024-03-30 21:00:00	Axilla/Groin	F28	PID00316	SRR30945872	SAMN44244868	Clade1	3	1.B.3.A											ERG11: Tyr132Phe
NV00395	2024-03-30 21:00:00	Axilla/Groin	F28	PID00316	SRR30945871	SAMN44244867	Clade3	6	3.A.6.F
NV00396	2024-01-29 21:00:00	Axilla/Groin	F36	PID00317	SRR29363955	SAMN41409308	Clade1	4	1.B.4.A											ERG11: Tyr132Phe
NV00397	2024-10-22	Wound	F36	PID00318	SRR33403326	SAMN48286626	Clade1	3	1.B.3.A	0.5	0.25		64	0.03	0.25	0.12	0.12	0.25		ERG11: Tyr132Phe
NV00398	2024-10-12	Blood	F36	PID00318	SRR33403229	SAMN48286589	Clade1	3	1.B.3.A	0.5	0.5		128	0.06	0.5	0.12	0.25	0.5		ERG11: Tyr132Phe
NV00399	2024-10-05	Urine	F36	PID00318	SRR33403248	SAMN48286608	Clade1	3	1.B.3.A	0.5	0.25		128	0.06	0.25	0.12	0.12	0.5		ERG11: Tyr132Phe
NV00400	2022-08-10 21:00:00	Axilla/Groin	F29	PID03403	SRR23109221	SAMN32670341	Clade3	5	3.A.5.E
NV00401	2022-04-20 21:00:00	Skin	F12	PID03366	SRR23920757	SAMN33829986	Clade1	5	1.A.5.C											ERG11: Lys143Arg		B9J08_000401: Gln142*
NV00402	2023-12-23 21:00:00	Skin Swab	F36	PID00319	SRR28069429	SAMN40079059	Clade1	3	1.A.3.B											ERG11: Lys143Arg		B9J08_000401: Gln142*
NV00403	2024-02-13 21:00:00	Urine	F36	PID00319	SRR29280535	SAMN41409407	Clade1	3	1.A.3.B										FKS1: Leu638Phe	ERG11: Lys143Arg		B9J08_000401: Gln142*
NV00404	2024-04-23 21:00:00	Axilla/Groin	F28	PID00321	SRR30945881	SAMN44244877	Clade1	13	1.A.13.A											ERG11: Lys143Arg		B9J08_000401: Gln142*
NV00405	2024-04-13 21:00:00	Wound	F36	PID00321	SRR30865487	SAMN43829935	Clade1	13	1.A.13.A	0.25	0.5		>256	1	0.5	0.12	0.25	4		ERG11: Lys143Arg		B9J08_000401: Gln142*
NV00406	2023-10-17 21:00:00	Urine	F39	PID00322	SRR27645391	SAMN39504804	Clade1	5	1.A.5.C	0.5	0.5		>256	1	1	0.5	0.5	4		ERG11: Lys143Arg		B9J08_000401: Gln142*
NV00407	2022-09-09 21:00:00	Axilla/Groin	F39	PID00323	SRR23109173	SAMN32670197	Clade3	4	3.A.4.J	0.5	0.25	0.06	>256	0.5	0.5		0.25	2
NV00408	2022-09-09 21:00:00	Blood	F41	PID00323	SRR23109172	SAMN32670196	Clade1	13	1.A.13.E											ERG11: Lys143Arg		B9J08_000401: Gln142*
NV00409	2022-09-18 21:00:00	Urine	F41	PID00323	SRR23109152	SAMN32670144	Clade1	13	1.A.13.E	0.5	1	1	256	1	1	0.25	0.5	4	FKS1: Leu686Phe	ERG11: Lys143Arg		B9J08_000401: Gln142*
NV00410	2023-09-09 21:00:00	Trachea	F38	PID00324	SRR27645487	SAMN39504705	Clade1	3	1.B.3.A											ERG11: Tyr132Phe
NV00411	2024-01-18 21:00:00	Urine	F39	PID00325	SRR29365074	SAMN41409220	Clade1	13	1.A.13.E	0.25	0.5		>256	1	1	0.25	0.5	8		ERG11: Lys143Arg		B9J08_000401: Gln142*
NV00412	2023-10-27 21:00:00	Axilla/Groin	F39	PID00326	SRR27607842	SAMN39273809	Clade3	6	3.A.6.E
NV00413	2023-11-14 21:00:00	Skin Swab	F38	PID00326	SRR27607936	SAMN39273754	Clade3	6	3.A.6.E
NV00414	2023-06-22 21:00:00	Axilla/Groin	F33	PID00327	SRR27130958	SAMN38336703	Clade3	6	3.A.6.E
NV00415	2023-06-22 21:00:00	Axilla/Groin	F33	PID00327	SRR27135909	SAMN38336273	Clade1	11	1.A.11.C											ERG11: Lys143Arg		B9J08_000401: Gln142*
NV00416	2023-07-11 21:00:00	Axilla/Groin	F27	PID00327	SRR27135656	SAMN38336301	Clade3	6	3.A.6.E
NV00417	2024-12-03	Surgery Culture	F36	PID03516	SRR33405938	SAMN48288187	Clade3	4	3.A.4.K	1	2		256	0.25	1	0.5	0.5	2
NV00418	2024-07-07 21:00:00	Axilla/Groin	F36	PID00328	SRR33381046	SAMN48209750	Clade1	5	1.B.5.A											ERG11: Tyr132Phe
NV00419	2023-01-18 21:00:00	Trachea	F36	PID00329	SRR23920685	SAMN33829932	Clade3	3	3.A.3.L	0.06	0.25	0.12	256	0.12	0.25	0.25	0.12	2
NV00421	2023-04-04 21:00:00	Urine	F36	PID00330	SRR27636247	SAMN35640982	Clade1	13	1.A.13.A	0.5	0.5	0.25	>256	1	0.25	0.25	0.12	4		ERG11: Lys143Arg		B9J08_000401: Gln142*
NV00422	2023-04-09 21:00:00	Blood	F36	PID00330	SRR27636312	SAMN35640910	Clade1	13	1.A.13.A	0.5	0.5	0.5	128	1	0.5	0.12	0.12	1		ERG11: Lys143Arg		B9J08_000401: Gln142*
NV00423	2023-04-16 21:00:00	Wound	F36	PID00330	SRR27636444	SAMN35640929	Clade1	13	1.A.13.A											ERG11: Lys143Arg		B9J08_000401: Gln142*
NV00424	2023-05-03 21:00:00	Axilla/Groin	F29	PID00331	SRR27636280	SAMN35640935	Clade3	5	3.A.5.D
NV00425	2024-01-23 21:00:00	Axilla/Groin	F30	PID00331	SRR29364010	SAMN41409256	Clade3	13	3.A.13.D												FUR1: Val103Gly
NV00426	2023-05-24 21:00:00	Axilla/Groin	F33	PID00331	SRR27131002	SAMN38336644	Clade3	5	3.A.5.D
NV00427	2023-11-26 21:00:00	Axilla/Groin	F33	PID00331	SRR27718887	SAMN39600238	Clade3	5	3.A.5.D
NV00428	2024-05-17 21:00:00	Axilla/Groin	F33	PID00331	SRR30946224	SAMN44245340	Clade3	5	3.A.5.D
NV00429	2024-04-27 21:00:00	Urine	F39	PID00331	SRR30866557	SAMN43829827	Clade3	5	3.A.5.D	0.5	1		>256	0.25	0.5	0.25	0.25	2
NV00430	2023-11-10 21:00:00	Axilla/Groin	F29	PID00332	SRR27645376	SAMN39504610	Clade3	6	3.A.6.E
NV00431	2024-01-22 21:00:00	Skin Swab	F28	PID00333	SRR29363940	SAMN41409251	Clade1	1	1.B.1.A											ERG11: Tyr132Phe
NV00432	2024-04-10 21:00:00	Wound	F36	PID00333	SRR30868015	SAMN43829816	Clade3	4	3.A.4.D	0.5	0.5		>256	0.12	0.25	0.25	0.12	1
NV00433	2023-03-20 21:00:00	Axilla/Groin	F36	PID00335	SRR27636362	SAMN35641015	Clade3	5	3.A.5.E
NV00434	2023-07-20 21:00:00	Axilla/Groin	F33	PID00337	SRR27135775	SAMN38336452	Clade3	6	3.A.6.E
NV00435	2024-02-12 21:00:00	Axilla/Groin	F12	PID00336	SRR29280560	SAMN41409395	Clade3	9	3.A.9.B
NV00436	2024-05-07 21:00:00	Axilla/Groin	F12	PID00336	SRR30945921	SAMN44244922	Clade3	9	3.A.9.B
NV00437	2024-07-16 21:00:00	Axilla/Groin	F12	PID00336	SRR33388504	SAMN48265008	Clade3	9	3.A.9.B
NV00438	2024-05-03 21:00:00	Blood	F25	PID00336	SRR30945901	SAMN44244897	Clade3	9	3.A.9.B	1	0.06		256	0.25	0.5	0.06	0.25	2
NV00439	2024-07-07 21:00:00	Blood	F25	PID00336	SRR33388476	SAMN48264951	Clade3	9	3.A.9.B	1	0.25		256	0.12	0.5	0.12	0.12	1
NV00440	2024-01-16 21:00:00	Axilla/Groin	F39	PID00338	SRR29365105	SAMN41409200	Clade3	9	3.A.9.B
NV00441	2024-01-19 21:00:00	Axilla/Groin	F39	PID00338	SRR29365085	SAMN41409225	Clade3	9	3.A.9.B
NV00442	2022-08-22 21:00:00	Axilla/Groin	F12	PID03430	SRR23109056	SAMN32670262	Clade3	7	3.A.7.D
NV00443	2023-10-23 21:00:00	Axilla/Groin	F36	PID00340	SRR27718948	SAMN39600255	Clade3	13	3.A.13.H
NV00444	2023-01-24 21:00:00	Blood	F36	PID00341	SRR23920674	SAMN33829926	Clade3	3	3.A.3.K	0.25	1	0.25	256	0.25	0.5	0.5	0.25	4
NV00445	2023-03-17 21:00:00	Blood	F36	PID00341	SRR27636355	SAMN35641007	Clade3	3	3.A.3.K	1	0.5	0.25	256	0.12	0.5	0.25	0.25	2
NV00446	2023-04-20 21:00:00	Blood	F36	PID00341	SRR27636435	SAMN35640965	Clade3	3	3.A.3.K
NV00447	2024-08-21 21:00:00	Wound	F39	PID00343	SRR33391942	SAMN48270032	Clade1	1	1.A.1.B	0.25	0.12		>256	0.5	0.5	0.06	0.12	4		ERG11: Lys143Arg		B9J08_000401: Gln142*
NV00448	2024-05-14 21:00:00	Axilla/Groin	F36	PID00344	SRR30946258	SAMN44245360	Clade3	12	3.A.12.C
NV00449	2022-09-06 21:00:00	Skin Swab	F40	PID00345	SRR23248982	SAMN32934611	Clade3	8	3.A.8.A
NV00450	2023-08-23 21:00:00	Axilla/Groin	F32	PID00346	SRR27135633	SAMN38336454	Clade1	1	1.A.1.B											ERG11: Lys143Arg		B9J08_000401: Gln142*
NV00451	2023-02-07 21:00:00	Blood	F36	PID00350	SRR23920658	SAMN33829913	Clade3	9	3.A.9.A	0.5	2	0.5	256	0.25	0.5	0.5	0.25	4
NV00452	2024-03-18 21:00:00	Axilla/Groin	F35	PID00352	SRR30846278	SAMN43830231	Clade3	3	3.A.3.M
NV00453	2024-04-04 21:00:00	Axilla/Groin	F35	PID00352	SRR30847317	SAMN43830059	Clade3	3	3.A.3.M
NV00454	2024-03-10 21:00:00	Axilla/Groin	F36	PID00353	SRR30844124	SAMN43817373	Clade1	13	1.A.13.E											ERG11: Lys143Arg		B9J08_000401: Gln142*
NV00455	2022-08-23 21:00:00	Skin Swab	F40	PID00354	SRR23137781	SAMN32797888	Clade3	1	3.A.1.C
NV00456	2023-08-24 21:00:00	Axilla/Groin	F30	PID00354	SRR27135640	SAMN38336439	Clade3	4	3.A.4.J
NV00457	2023-08-09 21:00:00	Axilla/Groin	F28	PID00355	SRR27130874	SAMN38336734	Clade3	8	3.A.8.D
NV00458	2024-02-08 21:00:00	Axilla/Groin	F29	PID00356	SRR30844109	SAMN43817422	Clade3	8	3.A.8.C
NV00459	2023-03-13 21:00:00	Axilla/Groin	F12	PID00357	SRR27636479	SAMN35641036	Clade3	6	3.A.6.E
NV00460	2024-01-07 21:00:00	Wound	F36	PID00358	SRR29364609	SAMN41409135	Clade3	8	3.A.8.C	0.25	0.5		256	0.5	1	0.25	0.5	2
NV00461	2024-02-13 21:00:00	Axilla/Groin	F02	PID00360	SRR29280557	SAMN41409406	Clade3	11	3.A.11.E
NV00462	2024-04-07 21:00:00	Axilla/Groin	F02	PID00360	SRR30847320	SAMN43830062	Clade3	11	3.A.11.E
NV00463	2023-11-26 21:00:00	Axilla/Groin	F28	PID00360	SRR27645295	SAMN39504595	Clade3	11	3.A.11.E
NV00464	2024-03-05 21:00:00	Wound	F36	PID00361	SRR30846306	SAMN43817223	Clade3	4	3.A.4.F	0.5	0.25		>256	0.12	0.5	0.25	0.25	1
NV00465	2023-09-13 21:00:00	Axilla/Groin	F33	PID00362	SRR27645482	SAMN39504720	Clade3	13	3.A.13.K
NV00466	2023-05-17 21:00:00	Axilla/Groin	F12	PID00363	SRR27131008	SAMN38336626	Clade3	12	3.A.12.D
NV00467	2024-03-13 21:00:00	Axilla/Groin	F39	PID00363	SRR30846324	SAMN43817241	Clade3	12	3.A.12.D
NV00468	2022-08-10 21:00:00	Axilla/Groin	F12	PID03411	SRR23109218	SAMN32670338	Clade1	3	1.A.3.C											ERG11: Lys143Arg		B9J08_000401: Gln142*
NV00469	2024-05-06 21:00:00	Axilla/Groin	F35	PID00365	SRR30867978	SAMN43829779	Clade3	13	3.A.13.I
NV00470	2024-02-07 21:00:00	Axilla/Groin	F13	PID00366	SRR29280581	SAMN41409362	Clade3	13	3.A.13.M
NV00471	2024-02-04 21:00:00	Wound	F36	PID00366	SRR29280593	SAMN41409339	Clade3	13	3.A.13.M
NV00472	2024-01-28 21:00:00	Trachea	F36	PID00366	SRR29363976	SAMN41409294	Clade3	13	3.A.13.M
NV00473	2024-07-06 21:00:00	Axilla/Groin	F36	PID00366	SRR33381100	SAMN48209760	Clade3	13	3.A.13.M
NV00474	2024-07-31 21:00:00	Axilla/Groin	F36	PID00367	SRR33392046	SAMN48270133	Clade3	11	3.A.11.J
NV00475	2024-08-05 21:00:00	Axilla/Groin	F12	PID00369	SRR33391946	SAMN48270065	Clade1	2	1.A.2.A											ERG11: Lys143Arg		B9J08_000401: Gln142*
NV00476	2024-11-21	Wound	F38	PID00369	SRR33405824	SAMN48288220	Clade1	2	1.A.2.A	0.25	0.5		>256	1	0.5	0.25	0.25	1		ERG11: Lys143Arg		B9J08_000401: Gln142*
NV00477	2023-08-10 21:00:00	Axilla/Groin	F10	PID00370	SRR27135873	SAMN38336506	Clade3	12	3.A.12.D
NV00478	2024-04-22 21:00:00	Axilla/Groin	F12	PID00371	SRR30945885	SAMN44244881	Clade1	1	1.B.1.A										FKS1: Arg1354His	ERG11: Tyr132Phe
NV00479	2024-05-12 21:00:00	Axilla/Groin	F39	PID00371	SRR30945898	SAMN44244894	Clade1	1	1.B.1.A										FKS1: Arg1354His	ERG11: Tyr132Phe
NV00480	2024-05-12 21:00:00	Axilla/Groin	F39	PID00371	SRR30945897	SAMN44244893	Clade3	5	3.A.5.C
NV00481	2022-09-01 21:00:00	Wound	F41	PID00372	SRR23109029	SAMN32670235	Clade1	2	1.A.2.I	0.5	0.5	0.25	256	0.5	0.5		0.25	1		ERG11: Lys143Arg		B9J08_000401: Gln142*
NV00482	2023-10-16 21:00:00	Axilla/Groin	F36	PID00373	SRR27607918	SAMN39273864	Clade1	11	1.A.11.B											ERG11: Lys143Arg
NV00483	2024-01-10 21:00:00	Urine	F39	PID00374	SRR29364606	SAMN41409152	Clade3	8	3.A.8.C	0.5	1		>256	2	1	0.25	0.5	8
NV00484	2022-04-26 21:00:00	Axilla/Groin	F13	PID03381	SRR23958498	SAMN30468072	Clade3	4	3.A.4.B
NV00485	2024-03-24 21:00:00	Axilla/Groin	F02	PID00376	SRR30846246	SAMN43830199	Clade1	3	1.A.3.B											ERG11: Lys143Arg		B9J08_000401: Gln142*
NV00486	2024-06-20 21:00:00	Axilla/Groin	F39	PID00377	SRR33370043	SAMN48199617	Clade1	2	1.B.2.A											ERG11: Tyr132Phe
NV00487	2024-07-04 21:00:00	Urine	F39	PID00377	SRR33381031	SAMN48209735	Clade1	10	1.A.10.A	0.25	0.12		>256	0.5	0.5	0.03	0.5	1		ERG11: Lys143Arg		B9J08_000401: Gln142*
NV00488	2024-07-04 21:00:00	Urine	F39	PID00377	SRR33381032	SAMN48209736	Clade1	10	1.A.10.A	0.25	0.12		>256	0.5	0.5	0.03	0.5	1		ERG11: Lys143Arg		B9J08_000401: Gln142*
NV00489	2024-07-26 21:00:00	Axilla/Groin	F36	PID00378	SRR33388544	SAMN48264929	Clade3	12	3.A.12.B
NV00490	2023-12-12 21:00:00	Wound	F38	PID00378	SRR27718928	SAMN39600253	Clade3	12	3.A.12.B	1	0.25		>256	0.12	0.25	0.25	0.12	1
NV00491	2023-04-17 21:00:00	Urine	F38	PID00379	SRR27636442	SAMN35640967	Clade3	10	3.A.10.E
NV00492	2023-06-21 21:00:00	Axilla/Groin	F28	PID00380	SRR27130960	SAMN38336701	Clade3	6	3.A.6.E
NV00493	2023-07-08 21:00:00	Axilla/Groin	F10	PID00381	SRR27135670	SAMN38336496	Clade3	6	3.A.6.E
NV00494	2023-01-26 21:00:00	Wound	F15	PID00382	SRR27636381	SAMN35641066	Clade1	8	1.A.8.A											ERG11: Lys143Arg		B9J08_000401: Gln142*
NV00495	2023-04-18 21:00:00	Blood	F25	PID00382	SRR27636301	SAMN35640947	Clade1	8	1.A.8.A											ERG11: Lys143Arg		B9J08_000401: Gln142*
NV00496	2023-11-21 21:00:00	Blood	F31	PID00382	SRR27718867	SAMN39600297	Clade1	8	1.A.8.A	0.5	2		256	4	2	1	0.5	4		ERG11: Lys143Arg		B9J08_000401: Gln142*
NV00497	2024-04-18 21:00:00	Axilla/Groin	F29	PID00384	SRR30945874	SAMN44244870	Clade1	5	1.B.5.A
NV00498	2024-04-06 21:00:00	Axilla/Groin	F33	PID00384	SRR30847316	SAMN43830058	Clade1	5	1.B.5.A											ERG11: Tyr132Phe
NV00499	2024-04-04 21:00:00	Axilla/Groin	F33	PID00384	SRR30847314	SAMN43830056	Clade1	5	1.B.5.A											ERG11: Tyr132Phe
NV00500	2023-02-06 21:00:00	Axilla/Groin	F35	PID00385	SRR23920697	SAMN33829944	Clade3	4	3.A.4.D
NV00501	2024-03-25 21:00:00	Axilla/Groin	F36	PID00386	SRR30847389	SAMN43830131	Clade3	11	3.A.11.J
NV00502	2022-08-20 21:00:00	Skin Swab	F40	PID00387	SRR23137857	SAMN32797962	Clade3	3	3.A.3.K
NV00503	2022-12-05 21:00:00	Axilla/Groin	F39	PID00387	SRR23137785	SAMN32797892	Clade1	13	1.A.13.E											ERG11: Lys143Arg		B9J08_000401: Gln142*
NV00504	2023-03-19 21:00:00	Axilla/Groin	F39	PID00388	SRR27135972	SAMN38336433	Clade3	6	3.A.6.E
NV00505	2024-04-04 21:00:00	Urine	F39	PID00390	SRR30867953	SAMN43829754	Clade3	11	3.A.11.H	0.5	0.25		>256	0.06	0.25	0.12	0.06	2
NV00506	2023-01-04 21:00:00	Axilla/Groin	F34	PID00391	SRR23248994	SAMN32934623	Clade3	5	3.A.5.E
NV00507	2024-01-14 21:00:00	Skin Swab	F36	PID00393	SRR29365109	SAMN41409179	Clade1	3	1.A.3.D											ERG11: Lys143Arg		B9J08_000401: Gln142*
NV00508	2024-03-05 21:00:00	Urine	F36	PID00393	SRR30846363	SAMN43817273	Clade1	3	1.A.3.D	0.25	0.25		256	0.25	0.25	0.25	0.25	0.5		ERG11: Lys143Arg		B9J08_000401: Gln142*
NV00509	2023-05-14 21:00:00	Skin Swab	F39	PID00396	SRR27135845	SAMN38336523	Clade3	6	3.A.6.B												FUR1: Ala88Thr
NV00510	2023-11-29 21:00:00	Wound	F36	PID00399	SRR27718865	SAMN39600242	Clade3	6	3.A.6.F	0.5	2		256	0.25	0.5	2	0.25	2
NV00511	2024-02-14 21:00:00	Axilla/Groin	F02	PID00397	SRR29280549	SAMN41409414	Clade3	4	3.A.4.N
NV00512	2024-06-28 21:00:00	Axilla/Groin	F10	PID00398	SRR33370007	SAMN48199553	Clade1	12	1.A.12.C											ERG11: Lys143Arg	FUR1: Arg101Leu	B9J08_000401: Gln142*
NV00513	2024-05-15 21:00:00	Axilla/Groin	F09	PID00401	SRR30946238	SAMN44245308	Clade3	7	3.A.7.C
NV00514	2024-05-12 21:00:00	Axilla/Groin	F12	PID00402	SRR30945859	SAMN44244855	Clade1	12	1.A.12.B											ERG11: Lys143Arg	FUR1: Arg101Leu	B9J08_000401: Gln142*
NV00515	2023-08-11 21:00:00	Wound	F36	PID00403	SRR27135867	SAMN38336276	Clade3	12	3.A.12.D	0.5	0.5	0.25	128	0.25	0.5	0.25	0.25	2
NV00516	2023-05-10 21:00:00	Axilla/Groin	F36	PID00404	SRR27636231	SAMN35640959	Clade3	13	3.A.13.K
NV00517	2023-05-29 21:00:00	Skin Swab	F36	PID00404	SRR27135708	SAMN38336588	Clade3	13	3.A.13.K	0.5	0.25	0.12	256	0.25	0.5	0.25	0.25	2
NV00518	2022-07-08 21:00:00	Wound	F31	PID00405	SRR23958540	SAMN30468114	Clade3	4	3.A.4.J
NV00519	2022-10-07 21:00:00	Axilla	F36	PID00405	SRR23108906	SAMN32670044	Clade3	4	3.A.4.J	0.5	0.5	0.25	64	0.12	0.5	0.5	0.25	2
NV00520	2024-04-28 21:00:00	Axilla/Groin	F36	PID00406	SRR30866594	SAMN43829864	Clade3	3	3.A.3.J
NV00521	2023-03-29 21:00:00	Axilla/Groin	F33	PID00407	SRR27636269	SAMN35640990	Clade3	4	3.A.4.D
NV00522	2022-06-07 21:00:00	Skin	F40	PID00408	SRR23958551	SAMN30468125	Clade3	5	3.A.5.E
NV00523	2024-05-05 21:00:00	Axilla/Groin	F36	PID00409	SRR30866569	SAMN43829839	Clade3	11	3.A.11.E
NV00524	2024-06-08 21:00:00	Axilla/Groin	F36	PID00409	SRR30946940	SAMN44246125	Clade3	11	3.A.11.E
NV00525	2022-06-01 21:00:00	Skin	F22	PID00411	SRR20081642	SAMN29634995	Clade3	5	3.A.5.E
NV00526	2023-04-30 21:00:00	Axilla/Groin	F39	PID00412	SRR27636288	SAMN35640960	Clade3	8	3.A.8.A
NV00527	2023-05-26 21:00:00	Axilla/Groin	F39	PID00412	SRR27135734	SAMN38336465	Clade3	8	3.A.8.A
NV00528	2022-12-01 21:00:00	Groin	F36	PID00413	SRR23137791	SAMN32797896	Clade3	9	3.A.9.A
NV00529	2023-02-14 21:00:00	Blood	F36	PID00413	SRR27636518	SAMN35641139	Clade1	2	1.A.2.I	0.5	0.25	0.12	256	2	1	0.25	0.5	4		ERG11: Lys143Arg		B9J08_000401: Gln142*
NV00530	2023-11-21 21:00:00	Axilla/Groin	F36	PID00413	SRR27718901	SAMN39600241	Clade3	5	3.A.5.E
NV00531	2023-11-21 21:00:00	Axilla/Groin	F36	PID00413	SRR27645305	SAMN39504674	Clade3	5	3.A.5.E
NV00532	2023-11-21 21:00:00	Skin Swab	F36	PID00413	SRR27607886	SAMN39273736	Clade3	5	3.A.5.E
NV00533	2022-10-04 21:00:00	Skin Swab	F40	PID00414	SRR23108826	SAMN32670092	Clade3	3	3.A.3.B
NV00534	2024-04-08 21:00:00	Axilla/Groin	F02	PID00410	SRR30865544	SAMN43829992	Clade3	11	3.A.11.C
NV00535	2022-07-04 21:00:00	Urine	F31	PID00415	SRR23958546	SAMN30468120	Clade1	5	1.A.5.C											ERG11: Lys143Arg		B9J08_000401: Gln142*
NV00536	2023-09-09 21:00:00	Axilla/Groin	F35	PID00416	SRR27645498	SAMN39504737	Clade1	1	1.B.1.A											ERG11: Tyr132Phe
NV00537	2024-09-27	Wound	F36	PID00417	SRR33403274	SAMN48286662	Clade3	2	3.A.2.D	0.5	0.5		128	0.12	0.25	0.25	0.12	1
NV00538	2022-12-12 21:00:00	Urine	F41	PID00417	SRR23920728	SAMN33829887	Clade3	2	3.A.2.D	0.5	0.25	0.06	>256	0.12	0.25	0.12	0.06	4
NV00540	2023-03-02 21:00:00	Axilla/Groin	F39	PID00419	SRR27636404	SAMN35641090	Clade1	3	1.A.3.A											ERG11: Lys143Arg		B9J08_000401: Gln142*
NV00541	2023-03-03 21:00:00	Axilla/Groin	F39	PID00419	SRR27636403	SAMN35641089	Clade3	13	3.A.13.D
NV00542	2023-04-13 21:00:00	Axilla/Groin	F36	PID00421	SRR27636465	SAMN35640950	Clade3	3	3.A.3.I
NV00543	2022-05-15 21:00:00	Blood	F31	PID00422	SRR19738708	SAMN29101419	Clade1	12	1.A.12.A	0.25	1	0.25	>256	0.5	0.5	0.5	0.5	2		ERG11: Lys143Arg	FUR1: Arg101Leu	B9J08_000401: Gln142*
NV00544	2024-09-18	Trachea	F36	PID00423	SRR33403353	SAMN48286711	Clade1	3	1.B.3.A	1	0.12		32	0.03	0.06	0.12	0.06	0.5		ERG11: Tyr132Phe
NV00545	2024-09-18	Bone	F36	PID00423	SRR33403303	SAMN48286691	Clade1	3	1.B.3.A	0.5	0.12		32	0.015	0.03	0.06	0.03	0.12		ERG11: Tyr132Phe
NV00546	2024-04-27 21:00:00	Axilla/Groin	F36	PID00424	SRR30866607	SAMN43829877	Clade3	13	3.A.13.L
NV00547	2024-04-26 21:00:00	Axilla/Groin	F36	PID00424	SRR30866595	SAMN43829865	Clade3	13	3.A.13.L
NV00548	2024-04-27 21:00:00	Trachea	F36	PID00424	SRR30945931	SAMN44244932	Clade3	13	3.A.13.L	0.5	0.5		>256	0.25	0.5	0.25	0.25	2
NV00549	2024-04-30 21:00:00	Wound	F36	PID00424	SRR30945930	SAMN44244931	Clade3	13	3.A.13.L	0.5	0.5		64	0.25	0.5	0.5	0.12	1
NV00550	2023-12-22 21:00:00	Axilla/Groin	F36	PID00425	SRR28069392	SAMN40079083	Clade3	12	3.A.12.E
NV00551	2022-09-18 21:00:00	Axilla/Groin	F02	PID00426	SRR23108991	SAMN32670165	Clade3	5	3.A.5.E
NV00552	2024-02-05 21:00:00	Axilla/Groin	F33	PID00426	SRR30844152	SAMN43817400	Clade3	5	3.A.5.E
NV00553	2022-11-22 21:00:00	Blood	F41	PID00426	SRR23137806	SAMN32797911	Clade3	1	3.A.1.B	0.5	1	0.25	>256	0.25	1	0.5	0.5	4
NV00554	2024-03-09 21:00:00	Axilla/Groin	F36	PID00428	SRR30844126	SAMN43817375	Clade3	6	3.A.6.G
NV00555	2024-06-28 21:00:00	Axilla/Groin	F36	PID00429	SRR33381078	SAMN48209810	Clade3	5	3.A.5.F
NV00556	2024-07-19 21:00:00	Axilla/Groin	F36	PID00429	SRR33388575	SAMN48264990	Clade3	5	3.A.5.F
NV00557	2022-11-25 21:00:00	Wound	F36	PID00431	SRR23137807	SAMN32797912	Clade3	4	3.A.4.B	0.25	1	0.25	>256	0.25	0.5	0.25	0.25	4
NV00558	2022-12-21 21:00:00	Blood	F36	PID00431	SRR23137736	SAMN32797843	Clade3	4	3.A.4.B	0.12	0.06	0.12	256	0.12	0.5	0.12	0.25	2
NV00559	2024-07-07 21:00:00	Axilla/Groin	F36	PID00432	SRR33381099	SAMN48209759	Clade3	13	3.A.13.K
NV00560	2024-07-14 21:00:00	Axilla/Groin	F36	PID00432	SRR33388597	SAMN48265040	Clade3	13	3.A.13.K
NV00561	2023-10-21 21:00:00	Axilla/Groin	F39	PID00433	SRR27607872	SAMN39273839	Clade1	2	1.A.2.A											ERG11: Lys143Arg		B9J08_000401: Gln142*
NV00562	2023-12-18 21:00:00	Skin Swab	F29	PID00434	SRR29364654	SAMN41409039	Clade3	5	3.A.5.F
NV00563	2023-07-19 21:00:00	Axilla/Groin	F14	PID00435	SRR27135781	SAMN38336425	Clade1	4	1.A.4.B											ERG11: Lys143Arg		B9J08_000401: Gln142*
NV00564	2024-01-27 21:00:00	Wound	F36	PID00436	SRR29363984	SAMN41409282	Clade1	11	1.A.11.B											ERG11: Lys143Arg		B9J08_000401: Gln142*
NV00565	2024-02-09 21:00:00	Wound	F39	PID00436	SRR29280563	SAMN41409380	Clade3	13	3.A.13.M
NV00566	2023-12-28 21:00:00	Skin Swab	F28	PID00438	SRR29364646	SAMN41409097	Clade3	13	3.A.13.K
NV00567	2022-12-14 21:00:00	Axilla/Groin	F28	PID00440	SRR23137747	SAMN32797854	Clade3	11	3.A.11.A
NV00568	2022-12-13 21:00:00	Skin Swab	F40	PID00441	SRR23137765	SAMN32797872	Clade3	4	3.A.4.C
NV00569	2024-07-09 21:00:00	Urine	F38	PID00442	SRR30945853	SAMN44244910	Clade1	3	1.A.3.A	0.25	0.5		256	0.25	0.5	0.25	0.25	0.5		ERG11: Lys143Arg		B9J08_000401: Gln142*
NV00570	2023-09-22 21:00:00	Axilla/Groin	F36	PID00443	SRR27645424	SAMN39504875	Clade3	11	3.A.11.I
NV00571	2023-10-11 21:00:00	Axilla/Groin	F36	PID00443	SRR27645258	SAMN39504882	Clade3	11	3.A.11.I
NV00572	2024-04-09 21:00:00	Axilla/Groin	F39	PID00444	SRR30865540	SAMN43829988	Clade1	2	1.B.2.A											ERG11: Tyr132Phe
NV00573	2023-10-19 21:00:00	Axilla/Groin	F29	PID00445	SRR27607870	SAMN39273837	Clade1	13	1.A.13.A											ERG11: Lys143Arg		B9J08_000401: Gln142*
NV00574	2024-05-07 21:00:00	Axilla/Groin	F36	PID00446	SRR30945917	SAMN44244918	Clade3	6	3.A.6.B
NV00575	2024-05-07 21:00:00	Axilla/Groin	F36	PID00446	SRR30945916	SAMN44244917	Clade1	12	1.A.12.B											ERG11: Lys143Arg	FUR1: Arg101Leu	B9J08_000401: Gln142*
NV00576	2024-05-08 21:00:00	Trachea	F36	PID00446	SRR30946269	SAMN44245370	Clade1	12	1.A.12.B	0.5	0.5		>256	1	0.5	0.25	0.5	2		ERG11: Lys143Arg	FUR1: Arg101Leu	B9J08_000401: Gln142*
NV00577	2024-02-14 21:00:00	Axilla/Groin	F12	PID00447	SRR30844110	SAMN43817359	Clade3	9	3.A.9.B
NV00578	2024-03-30 21:00:00	Blood	F36	PID00448	SRR30844561	SAMN43817336	Clade1	5	1.B.5.A	0.5	0.25		64	0.03	0.06	0.12	0.03	0.5		ERG11: Tyr132Phe
NV00579	2024-02-05 21:00:00	Axilla/Groin	F36	PID00450	SRR29280613	SAMN41409351	Clade3	3	3.A.3.B
NV00580	2023-02-12 21:00:00	Urine	F41	PID00451	SRR23920730	SAMN33829889	Clade1	2	1.A.2.I	0.5	0.5	0.25	256	1	0.5	0.25	0.25	2		ERG11: Lys143Arg		B9J08_000401: Gln142*
NV00581	2024-03-11 21:00:00	Axilla/Groin	F36	PID00452	SRR30846333	SAMN43817250	Clade3	13	3.A.13.E
NV00582	2024-03-11 21:00:00	Axilla/Groin	F36	PID00452	SRR30846332	SAMN43817249	Clade1	11	1.A.11.B											ERG11: Lys143Arg		B9J08_000401: Gln142*
NV00583	2024-03-11 21:00:00	Wound	F36	PID00452	SRR30844120	SAMN43817369	Clade1	11	1.A.11.B	0.5	0.5		>256	1	0.5	0.25	0.5	1		ERG11: Lys143Arg		B9J08_000401: Gln142*
NV00584	2024-06-20 21:00:00	Wound	F36	PID00455	SRR33370013	SAMN48199587	Clade3	12	3.A.12.F	0.5	1		256	0.5	0.5	0.5	0.25	4
NV00585	2024-02-11 21:00:00	Axilla/Groin	F36	PID00456	SRR29280579	SAMN41409393	Clade3	13	3.A.13.K
NV00586	2024-03-27 21:00:00	Axilla/Groin	F36	PID00456	SRR30847371	SAMN43830113	Clade3	13	3.A.13.K
NV00587	2024-04-29 21:00:00	Axilla/Groin	F36	PID00456	SRR30866593	SAMN43829863	Clade3	13	3.A.13.K
NV00588	2024-07-26 21:00:00	Axilla/Groin	F36	PID00456	SRR33388548	SAMN48264933	Clade3	13	3.A.13.K
NV00589	2024-08-05 21:00:00	Axilla/Groin	F36	PID00456	SRR33391983	SAMN48270102	Clade3	13	3.A.13.K
NV00590	2024-03-21 21:00:00	Axilla/Groin	F30	PID00459	SRR30847432	SAMN43830157	Clade3	3	3.A.3.F
NV00591	2024-05-13 21:00:00	Axilla/Groin	F13	PID00460	SRR30946259	SAMN44245361	Clade3	9	3.A.9.B
NV00592	2024-06-05 21:00:00	Axilla/Groin	F29	PID00460	SRR33345020	SAMN48181658	Clade3	9	3.A.9.B
NV00593	2024-06-05 21:00:00	Axilla/Groin	F29	PID00460	SRR33370071	SAMN48199645	Clade3	9	3.A.9.B
NV00594	2022-12-14 21:00:00	Skin Swab	F36	PID00461	SRR23249015	SAMN32934644	Clade3	13	3.A.13.C	0.25	0.12	0.06	256	0.06	0.12	0.06	0.06	1			FUR1: Val103Gly
NV00595	2024-01-14 21:00:00	Axilla/Groin	F36	PID00462	SRR29365118	SAMN41409184	Clade3	13	3.A.13.K
NV00596	2024-03-11 21:00:00	Urine	F38	PID00463	SRR29278638	SAMN41409521	Clade1	12	1.A.12.C	0.5	0.5		>256	0.5	0.5	0.25	0.25	1		ERG11: Lys143Arg	FUR1: Arg101Leu	B9J08_000401: Gln142*
NV00597	2022-03-23 21:00:00	Skin	F13	PID03342	SRR23958522	SAMN30468096	Clade3	3	3.A.3.H
NV00598	2023-06-13 21:00:00	Axilla/Groin	F38	PID00465	SRR27130979	SAMN38336742	Clade3	6	3.A.6.E
NV00599	2022-06-15 21:00:00	Skin	F40	PID00466	SRR23958531	SAMN30468105	Clade3	4	3.A.4.I
NV00600	2024-08-07 21:00:00	Trachea	F36	PID00466	SRR33392026	SAMN48270056	Clade3	4	3.A.4.I	0.5	1		>256	0.25	0.5	0.5	0.12	2
NV00601	2024-06-05 21:00:00	Axilla/Groin	F39	PID00466	SRR30946955	SAMN44246140	Clade3	4	3.A.4.I
NV00602	2024-06-28 21:00:00	Axilla/Groin	F13	PID00467	SRR33381059	SAMN48209791	Clade1	12	1.A.12.B											ERG11: Lys143Arg	FUR1: Arg101Leu	B9J08_000401: Gln142*
NV00603	2024-09-13	Urine	F38	PID00467	SRR33403342	SAMN48286700	Clade1	12	1.A.12.B	0.25	0.25		128	0.25	0.5	0.12	0.25	0.5		ERG11: Lys143Arg	FUR1: Arg101Leu	B9J08_000401: Gln142*
NV00604	2024-07-11 21:00:00	Axilla/Groin	F12	PID00468	SRR33388582	SAMN48264997	Clade1	13	1.A.13.A											ERG11: Lys143Arg		B9J08_000401: Gln142*
NV00605	2024-06-16 21:00:00	Axilla/Groin	F36	PID00469	SRR30946893	SAMN44246078	Clade3	4	3.A.4.J
NV00606	2023-11-01 21:00:00	Axilla/Groin	F33	PID00470	SRR27607828	SAMN39273795	Clade3	13	3.A.13.K
NV00607	2024-03-09 21:00:00	Axilla/Groin	F36	PID00471	SRR30846350	SAMN43817260	Clade1	11	1.A.11.A											ERG11: Lys143Arg		B9J08_000401: Gln142*
NV00608	2022-10-31 21:00:00	Axilla/Groin	F12	PID00472	SRR23137856	SAMN32797961	Clade3	4	3.A.4.C
NV00609	2023-11-30 21:00:00	Skin Swab	F39	PID00473	SRR27718878	SAMN39600271	Clade3	4	3.A.4.G	0.5	0.5		>256	0.12	0.25	0.5	0.12	2
NV00610	2024-03-28 21:00:00	Axilla/Groin	F28	PID00477	SRR30945870	SAMN44244866	Clade3	13	3.A.13.F
NV00611	2024-05-18 21:00:00	Axilla/Groin	F28	PID00477	SRR30946478	SAMN44245630	Clade3	13	3.A.13.F
NV00612	2024-05-02 21:00:00	Wound	F38	PID00477	SRR30867959	SAMN43829760	Clade1	1	1.B.1.A	1	0.12		64	0.03	0.12	0.06	0.03	0.25		ERG11: Tyr132Phe
NV00613	2024-05-07 21:00:00	Wound	F36	PID00477	SRR30946270	SAMN44245371	Clade1	1	1.B.1.A	1	0.12		64	0.06	0.12	0.12	0.03	0.5		ERG11: Tyr132Phe
NV00614	2024-05-06 21:00:00	Urine	F36	PID00477	SRR30945906	SAMN44244902	Clade1	1	1.B.1.A	1	0.12		128	0.03	0.12	0.06	0.03	0.5		ERG11: Tyr132Phe
NV00615	2024-06-16 21:00:00	Axilla/Groin	F36	PID00481	SRR33370067	SAMN48199641	Clade3	10	3.A.10.C
NV00616	2024-07-21 21:00:00	Axilla/Groin	F36	PID00484	SRR33388563	SAMN48264978	Clade1	8	1.A.8.A											ERG11: Lys143Arg		B9J08_000401: Gln142*
NV00617	2023-11-23 21:00:00	Axilla/Groin	F36	PID00485	SRR27718895	SAMN39600251	Clade3	12	3.A.12.D
NV00618	2024-06-23 21:00:00	Axilla/Groin	F36	PID00486	SRR33370035	SAMN48199609	Clade3	4	3.A.4.J
NV00619	2024-07-01 21:00:00	Trachea	F36	PID00486	SRR33381033	SAMN48209737	Clade3	4	3.A.4.J	0.5	0.5		256	0.12	0.5	0.25	0.12	2
NV00620	2024-10-29	Blood	F36	PID00486	SRR33403312	SAMN48286584	Clade3	4	3.A.4.J	0.5	0.5		256	0.12	0.5	0.25	0.25	1
NV00621	2024-07-31 21:00:00	Axilla/Groin	F36	PID00487	SRR33392045	SAMN48270132	Clade1	1	1.B.1.A											ERG11: Tyr132Phe
NV00622	2024-07-31 21:00:00	Axilla/Groin	F36	PID00487	SRR33392044	SAMN48270131	Clade3	3	3.A.3.J
NV00623	2024-12-03	Abscess	F36	PID00488	SRR33405940	SAMN48288189	Clade3	1	3.A.1.D	1	0.06		256	0.5	1	0.06	0.25	2
NV00624	2024-01-12 21:00:00	Axilla/Groin	F39	PID00490	SRR29365139	SAMN41409168	Clade3	4	3.A.4.E
NV00625	2024-02-19 21:00:00	Axilla/Groin	F30	PID00492	SRR30844608	SAMN43817313	Clade1	2	1.A.2.F											ERG11: Lys143Arg		B9J08_000401: Gln142*
NV00626	2022-12-28 21:00:00	Axilla/Groin	F35	PID00493	SRR23249001	SAMN32934630	Clade3	4	3.A.4.C
NV00627	2023-04-10 21:00:00	Urine	F39	PID00495	SRR27636463	SAMN35640918	Clade1	3	1.A.3.C											ERG11: Lys143Arg		B9J08_000401: Gln142*
NV00628	2022-06-15 21:00:00	Axilla/Groin	F12	PID00495	SRR23958460	SAMN30468034	Clade3	10	3.A.10.G
NV00629	2022-12-10 21:00:00	Axilla/Groin	F02	PID00496	SRR23249022	SAMN32934651	Clade3	4	3.A.4.O
NV00630	2023-09-11 21:00:00	Skin Swab	F38	PID00497	SRR27645446	SAMN39504710	Clade1	2	1.A.2.B	1	0.5	0.5	>256	0.25	0.5	0.5	0.25	1		ERG11: Lys143Arg	FUR1: Arg87Lys
NV00631	2023-09-17 21:00:00	Skin Swab	F38	PID00497	SRR27645444	SAMN39504750	Clade1	2	1.A.2.B	0.5	1	0.5	>256	1	1	0.5	0.5	2		ERG11: Lys143Arg		B9J08_000401: Gln142*
NV00632	2023-11-09 21:00:00	Blood	F38	PID00497	SRR27607954	SAMN39273772	Clade1	2	1.A.2.B	1	0.5		256	1	1	0.25	0.5	2		ERG11: Lys143Arg
NV00633	2023-12-23 21:00:00	Skin Swab	F38	PID00497	SRR28069381	SAMN40079072	Clade1	2	1.A.2.B	0.5	0.5		>256	1	0.5	0.25	0.5	1		ERG11: Lys143Arg	FUR1: Arg87Lys
NV00634	2023-04-17 21:00:00	Skin Swab	F39	PID00497	SRR27636439	SAMN35640945	Clade1	2	1.A.2.B											ERG11: Lys143Arg
NV00635	2023-08-28 21:00:00	Skin Swab	F39	PID00497	SRR27645507	SAMN39504721	Clade1	2	1.A.2.B											ERG11: Lys143Arg	FUR1: Arg87Lys
NV00636	2024-09-03 21:00:00	Wound	F36	PID00498	SRR33403366	SAMN48286724	Clade3	12	3.A.12.E	0.5	0.5		>256	0.25	0.5	0.25	0.25	4
NV00637	2023-12-03 21:00:00	Axilla/Groin	F36	PID00499	SRR27718871	SAMN39600288	Clade1	12	1.A.12.C											ERG11: Lys143Arg	FUR1: Arg101Leu	B9J08_000401: Gln142*
NV00638	2023-03-21 21:00:00	Skin Swab	F39	PID00500	SRR27636273	SAMN35640993	Clade1	4	1.B.4.A	1	0.5	0.25	64	0.12	0.25	0.12	0.06	0.5		ERG11: Tyr132Phe
NV00639	2024-01-03 21:00:00	Axilla/Groin	F36	PID00501	SRR29364641	SAMN41409117	Clade1	9	1.A.9.A											ERG11: Lys143Arg		B9J08_000401: Gln142*
NV00640	2021-12-22	Blood	F40	PID03416	SRR19738677	SAMN29101391	Clade1	2	1.A.2.H	0.25	0.5	0.25	256	0.5	0.5		0.12	1		ERG11: Lys143Arg		B9J08_000401: Gln142*
NV00641	2023-10-24 21:00:00	Axilla/Groin	F14	PID00503	SRR27607863	SAMN39273830	Clade1	2	1.A.2.F											ERG11: Lys143Arg		B9J08_000401: Gln142*
NV00643	2023-12-13 21:00:00	Axilla/Groin	F36	PID00503	SRR27718935	SAMN39600296	Clade1	2	1.A.2.F											ERG11: Lys143Arg		B9J08_000401: Gln142*
NV00644	2023-12-12 21:00:00	Urine	F36	PID00503	SRR27718933	SAMN39600295	Clade1	2	1.A.2.F	0.5	0.5		>256	0.25	0.5	0.25	0.25	1		ERG11: Lys143Arg		B9J08_000401: Gln142*
NV00645	2024-02-05 21:00:00	Wound	F36	PID00503	SRR29280575	SAMN41409350	Clade3	8	3.A.8.A
NV00646	2023-07-05	Wound	F36	PID00504	SRR27135663	SAMN38336455	Clade3	12	3.A.12.E	1	0.12	0.12	256	0.12	0.5	0.06	0.12	1
NV00647	2023-06-26 21:00:00	Axilla/Groin	F28	PID00505	SRR27135895	SAMN38336302	Clade3	4	3.A.4.D
NV00648	2022-08-03 21:00:00	Skin Swab	F40	PID00506	SRR23108894	SAMN32670128	Clade1	11	1.A.11.A											ERG11: Lys143Arg		B9J08_000401: Gln142*
NV00649	2022-09-02 21:00:00	Blood	F41	PID00506	SRR23109182	SAMN32670206	Clade1	11	1.A.11.A	0.25	0.5	0.5	256	0.5	0.5		0.25	2		ERG11: Lys143Arg		B9J08_000401: Gln142*
NV00650	2023-11-27 21:00:00	Axilla/Groin	F02	PID00508	SRR27645293	SAMN39504592	Clade3	12	3.A.12.G
NV00651	2024-02-13 21:00:00	Axilla/Groin	F33	PID00509	SRR29280562	SAMN41409402	Clade1	11	1.A.11.B											ERG11: Lys143Arg		B9J08_000401: Gln142*
NV00652	2024-07-21 21:00:00	Axilla/Groin	F36	PID00510	SRR33388560	SAMN48264975	Clade1	3	1.B.3.A											ERG11: Tyr132Phe
NV00653	2024-07-28 21:00:00	Axilla/Groin	F36	PID00510	SRR33388541	SAMN48264926	Clade1	3	1.B.3.A											ERG11: Tyr132Phe
NV00654	2023-09-26 21:00:00	Axilla/Groin	F36	PID00512	SRR27645336	SAMN39504803	Clade3	4	3.A.4.D
NV00655	2024-06-08 21:00:00	Sputum	F38	PID00514	SRR33369991	SAMN48199578	Clade1	2	1.A.2.H	0.5	1		>256	0.5	1	0.5	0.5	2		ERG11: Lys143Arg		B9J08_000401: Gln142*
NV00656	2023-02-12 21:00:00	Axilla/Groin	F39	PID00513	SRR27636526	SAMN35641147	Clade3	3	3.A.3.G
NV00657	2024-03-24 21:00:00	Axilla/Groin	F36	PID00516	SRR30865555	SAMN43830003	Clade3	12	3.A.12.D
NV00658	2023-06-09 21:00:00	Urine	F39	PID00519	SRR27135917	SAMN38336449	Clade1	3	1.A.3.D	0.5	1		>256	1	0.5	0.5	0.25	2		ERG11: Lys143Arg		B9J08_000401: Gln142*
NV00659	2023-11-11 21:00:00	Blood	F39	PID00520	SRR27607943	SAMN39273761	Clade1	13	1.A.13.D											ERG11: Lys143Arg	FUR1: Gln16*	B9J08_000401: Gln142*
NV00660	2024-03-12 21:00:00	Axilla/Groin	F36	PID00522	SRR30847454	SAMN43830179	Clade3	11	3.A.11.H
NV00661	2024-01-14 21:00:00	Blood	F36	PID00521	SRR29365112	SAMN41409180	Clade1	2	1.A.2.B	1	0.5		>256	0.25	0.25	0.12	0.06	4		ERG11: Lys143Arg		B9J08_000401: Gln142*
NV00662	2022-10-04 21:00:00	Skin Swab	F40	PID00524	SRR23108817	SAMN32670083	Clade1	11	1.A.11.A											ERG11: Lys143Arg		B9J08_000401: Gln142*
NV00663	2022-08-01 21:00:00	Bronchial Washing	F36	PID00523	SRR23109111	SAMN32670317	Clade1	11	1.A.11.A	0.5	0.5	0.25	>256	0.5	0.25		0.12	2		ERG11: Lys143Arg		B9J08_000401: Gln142*
NV00664	2023-07-05 21:00:00	Axilla/Groin	F14	PID00526	SRR27135887	SAMN38336516	Clade3	4	3.A.4.O
NV00665	2023-09-01 21:00:00	Urine	F36	PID00527	SRR27130910	SAMN38336623	Clade3	13	3.A.13.E
NV00666	2024-03-01 21:00:00	Urine	F36	PID00527	SRR29280512	SAMN41409498	Clade3	13	3.A.13.M
NV00667	2024-03-01 21:00:00	Axilla/Groin	F36	PID00527	SRR29280488	SAMN41409499	Clade3	13	3.A.13.E
NV00668	2024-03-02 21:00:00	Bone	F36	PID00527	SRR30846367	SAMN43817277	Clade3	13	3.A.13.L
NV00669	2024-03-17 21:00:00	Axilla/Groin	F36	PID00527	SRR30847449	SAMN43830174	Clade3	13	3.A.13.E
NV00670	2024-03-17 21:00:00	Axilla/Groin	F36	PID00527	SRR30847448	SAMN43830173	Clade3	13	3.A.13.M
NV00671	2024-05-30 21:00:00	Blood	F39	PID00528	SRR30946384	SAMN44245413	Clade3	10	3.A.10.D	1	0.5		256	0.12	0.5	0.25	0.12	2
NV00672	2024-07-07 21:00:00	Axilla/Groin	F33	PID00530	SRR33381050	SAMN48209754	Clade3	10	3.A.10.E
NV00673	2022-12-08 21:00:00	Skin Swab	F38	PID00531	SRR23137767	SAMN32797874	Clade3	5	3.A.5.D	0.5	1	0.25	256	0.12	0.25	0.25	0.12	2
NV00674	2024-08-10 21:00:00	Urine	F39	PID00532	SRR33391945	SAMN48270064	Clade3	6	3.A.6.E	0.5	0.5		>256	0.25	0.5	0.25	0.12	4
NV00675	2024-06-30 21:00:00	Axilla/Groin	F30	PID00533	SRR33381058	SAMN48209790	Clade3	10	3.A.10.E
NV00676	2023-05-10 21:00:00	Blood	F39	PID00534	SRR27135954	SAMN38336394	Clade3	5	3.A.5.F	0.5	0.5	0.12	256	0.12	0.5	0.25	0.12	4
NV00677	2024-06-17 21:00:00	Axilla/Groin	F28	PID00536	SRR33381122	SAMN48209782	Clade3	12	3.A.12.C
NV00678	2024-04-15 21:00:00	Axilla/Groin	F12	PID00535	SRR30945882	SAMN44244878	Clade1	13	1.A.13.A											ERG11: Lys143Arg		B9J08_000401: Gln142*
NV00679	2023-04-12 21:00:00	Axilla/Groin	F36	PID00537	SRR27636306	SAMN35640946	Clade1	13	1.A.13.D											ERG11: Lys143Arg		B9J08_000401: Gln142*
NV00680	2024-05-13 21:00:00	Axilla/Groin	F33	PID00538	SRR30946512	SAMN44245664	Clade1	4	1.A.4.E											ERG11: Lys143Arg		B9J08_000401: Gln142*
NV00681	2024-04-29 21:00:00	Urine	F38	PID00538	SRR30867956	SAMN43829757	Clade1	4	1.A.4.E	0.25	0.5		>256	0.5	0.5	0.25	0.25	1		ERG11: Lys143Arg		B9J08_000401: Gln142*
NV00682	2023-05-08 21:00:00	Axilla/Groin	F36	PID00539	SRR27636240	SAMN35640907	Clade3	8	3.A.8.A
NV00683	2023-08-06 21:00:00	Axilla/Groin	F36	PID00539	SRR27135678	SAMN38336320	Clade3	8	3.A.8.A
NV00684	2022-11-25 21:00:00	Urine	F36	PID00540	SRR23137803	SAMN32797908	Clade1	11	1.A.11.A	0.25	2	0.5	>256	2	1	0.5	0.5	4		ERG11: Lys143Arg		B9J08_000401: Gln142*
NV00685	2022-12-26 21:00:00	Blood	F36	PID00542	SRR23137726	SAMN32797833	Clade1	9	1.A.9.A	0.12	0.12	0.25	256	0.5	0.5	0.12	0.5	4		ERG11: Lys143Arg		B9J08_000401: Gln142*
NV00686	2024-05-26 21:00:00	Axilla/Groin	F30	PID00541	SRR30946427	SAMN44245456	Clade1	3	1.B.3.A											ERG11: Tyr132Phe
NV00687	2023-09-07 21:00:00	Axilla/Groin	F29	PID00544	SRR27135751	SAMN38336543	Clade1	13	1.A.13.F											ERG11: Lys143Arg		B9J08_000401: Gln142*
NV00688	2024-04-28 21:00:00	Axilla/Groin	F36	PID00545	SRR30867999	SAMN43829800	Clade3	13	3.A.13.K
NV00689	2024-05-24 21:00:00	Axilla/Groin	F36	PID00545	SRR30946228	SAMN44245298	Clade3	13	3.A.13.K
NV00690	2024-05-24 21:00:00	Axilla/Groin	F36	PID00545	SRR30946227	SAMN44245297	Clade1	2	1.A.2.G											ERG11: Lys143Arg		B9J08_000401: Gln142*
NV00691	2022-05-25	Urine	F31	PID03517	SRR20081627	SAMN29634980	Clade3	2	3.A.2.D	0.5	0.5	0.25	64	0.12	0.5	0.25	0.25	2
NV00692	2021-12-02	Blood	F38	PID03425	SRR19738683	SAMN29101397	Clade3	4	3.A.4.C
NV00693	2024-06-24 21:00:00	Axilla/Groin	F30	PID00550	SRR33369984	SAMN48199571	Clade1	4	1.B.4.A											ERG11: Tyr132Phe
NV00694		Trachea	F36	PID00551	SRR30846240	SAMN43830193	Clade1	5	1.B.5.A	0.5	0.25		64	0.03	0.12	0.12	0.06	0.25		ERG11: Tyr132Phe
NV00695	2023-10-10 21:00:00	Axilla/Groin	F12	PID00552	SRR27607931	SAMN39273877	Clade3	6	3.A.6.E
NV00696	2023-05-03 21:00:00	Groin	F38	PID00553	SRR27135959	SAMN38336437	Clade3	6	3.A.6.E	0.5	0.25	0.12	>256	0.25	0.5		0.12	1
NV00697	2024-03-19 21:00:00	Axilla/Groin	F36	PID00555	SRR30846277	SAMN43830230	Clade1	5	1.B.5.A											ERG11: Tyr132Phe
NV00698	2023-10-06 21:00:00	Axilla/Groin	F39	PID00556	SRR27607974	SAMN39273888	Clade3	10	3.A.10.C
NV00699	2023-08-28 21:00:00	Axilla/Groin	F12	PID00558	SRR27130914	SAMN38336593	Clade3	13	3.A.13.A
NV00700	2023-09-25 21:00:00	Trachea	F25	PID00558	SRR27645331	SAMN39504794	Clade1	3	1.A.3.E	0.5	0.25	0.25	>256	0.5	0.5	0.25	0.25	0.5		ERG11: Lys143Arg		B9J08_000401: Gln142*
NV00701	2023-12-02 21:00:00	Axilla/Groin	F39	PID00559	SRR28069466	SAMN40079128	Clade1	11	1.A.11.C											ERG11: Lys143Arg		B9J08_000401: Gln142*
NV00702	2023-12-15 21:00:00	Axilla/Groin	F39	PID00559	SRR28069454	SAMN40079116	Clade1	11	1.A.11.C											ERG11: Lys143Arg		B9J08_000401: Gln142*
NV00703	2023-04-20 21:00:00	Wound	F36	PID00557	SRR27636436	SAMN35640938	Clade1	2	1.A.2.F											ERG11: Lys143Arg		B9J08_000401: Gln142*
NV00704	2022-10-11 21:00:00	Axilla/Groin	F12	PID00562	SRR23137878	SAMN32797983	Clade3	2	3.A.2.A
NV00705	2022-07-08 21:00:00	Bronchial Lavage	F15	PID00562	SRR23109225	SAMN32670345	Clade3	2	3.A.2.A
NV00706	2022-07-14 21:00:00	Bronchial Lavage	F41	PID00562	SRR23958537	SAMN30468111	Clade3	2	3.A.2.A	0.5	0.25	0.12	256	0.06	0.06	0.06	0.06	2
NV00707	2022-07-14 21:00:00	Bronchial Lavage	F41	PID00562	SRR30844177	SAMN43817428	Clade3	2	3.A.2.A	0.5	0.25	0.12	256	0.06	0.06	0.06	0.06	2
NV00708	2022-09-15 21:00:00	Urine	F41	PID00562	SRR23109153	SAMN32670145	Clade3	5	3.A.5.B	>32	1	0.25	256	0.12	0.5	1	0.25	1
NV00709	2022-09-15 21:00:00	Urine	F41	PID00562	SRR30844175	SAMN43817426	Clade3	5	3.A.5.B	>32	1	0.25	256	0.12	0.5	1	0.25	1
NV00710	2022-08-23 21:00:00	Axilla/Groin	F12	PID00562	SRR23109090	SAMN32670296	Clade3	2	3.A.2.A
NV00711	2024-05-03 21:00:00	Axilla/Groin	F33	PID00563	SRR30866572	SAMN43829842	Clade3	6	3.A.6.B
NV00712	2024-05-05 21:00:00	Axilla/Groin	F33	PID00563	SRR30867979	SAMN43829780	Clade3	6	3.A.6.B
NV00713	2022-10-27 21:00:00	Blood	F36	PID00507	SRR23108844	SAMN32669982	Clade1	2	1.A.2.D	0.25	0.06	0.03	256	0.12	0.25		0.12	2		ERG11: Lys143Arg		B9J08_000401: Gln142*
NV00714	2022-10-19 21:00:00	Wound	F36	PID00507	SRR23108773	SAMN32670020	Clade3	6	3.A.6.D	0.25	0.12	0.06	>256	0.25	0.5	0.12	0.12	4
NV00715	2022-11-24 21:00:00	Urine	F36	PID00564	SRR23137808	SAMN32797913	Clade3	4	3.A.4.I	0.5	1	0.5	>256	0.25	0.5	0.5	0.25	4
NV00716	2024-08-31 21:00:00	Blood	F39	PID00565	SRR33391917	SAMN48270007	Clade3	6	3.A.6.E	0.5	1		256	0.25	0.5	0.25	0.25	4
NV00717	2024-07-07 21:00:00	Axilla/Groin	F36	PID00566	SRR33381097	SAMN48209757	Clade1	12	1.A.12.B											ERG11: Lys143Arg	FUR1: Arg101Leu	B9J08_000401: Gln142*
NV00718	2024-05-29 21:00:00	Axilla/Groin	F13	PID00567	SRR30946407	SAMN44245436	Clade1	1	1.B.1.A											ERG11: Tyr132Phe
NV00719	2023-08-07 21:00:00	Axilla/Groin	F29	PID00570	SRR27130878	SAMN38336663	Clade3	13	3.A.13.E
NV00720	2024-06-19 21:00:00	Axilla/Groin	F29	PID00571	SRR33381121	SAMN48209781	Clade1	13	1.A.13.D											ERG11: Lys143Arg	FUR1: Gln16*	B9J08_000401: Gln142*
NV00721	2022-08-10 21:00:00	Axilla/Groin	F12	PID03414	SRR23109217	SAMN32670337	Clade1	13	1.A.13.A											ERG11: Lys143Arg		B9J08_000401: Gln142*
NV00722	2023-10-05 21:00:00	Axilla/Groin	F10	PID00572	SRR27607976	SAMN39273890	Clade1	13	1.A.13.E											ERG11: Lys143Arg		B9J08_000401: Gln142*
NV00723	2023-01-31 21:00:00	Skin Swab	F36	PID00573	SRR23920662	SAMN33829917	Clade3	13	3.A.13.E	1	0.5	0.25	256	0.25	0.5	0.5	0.25	4
NV00724	2023-06-21 21:00:00	Axilla/Groin	F14	PID00575	SRR27135790	SAMN38336279	Clade3	6	3.A.6.G
NV00725	2023-03-08 21:00:00	Skin Swab	F36	PID00576	SRR27636490	SAMN35641047	Clade1	4	1.A.4.B	0.5	1	0.25	256	2	1	0.5	1	4		ERG11: Lys143Arg	FUR1: Glu115*	B9J08_000401: Gln142*
NV00726	2024-02-15 21:00:00	Axilla/Groin	F13	PID00579	SRR30844610	SAMN43817315	Clade3	5	3.A.5.B
NV00727	2023-06-27 21:00:00	Axilla/Groin	F39	PID00580	SRR27130952	SAMN38336680	Clade1	11	1.A.11.C											ERG11: Lys143Arg		B9J08_000401: Gln142*
NV00728	2023-10-04 21:00:00	Blood	F39	PID00580	SRR27645273	SAMN39504827	Clade1	11	1.A.11.C	0.5	1	0.5	>256	1	2	0.25	0.5	0.5		ERG11: Lys143Arg		B9J08_000401: Gln142*
NV00729	2023-10-12 21:00:00	Axilla/Groin	F39	PID00580	SRR27607923	SAMN39273869	Clade1	11	1.A.11.C											ERG11: Lys143Arg		B9J08_000401: Gln142*
NV00730	2022-11-15 21:00:00	Urine	F41	PID00581	SRR23137824	SAMN32797929	Clade3	12	3.A.12.G	0.25	0.25	0.12	128	0.12	0.25		0.12	2
NV00731	2023-02-01 21:00:00	Urine	F41	PID00581	SRR23920741	SAMN33829900	Clade3	12	3.A.12.G	0.5	0.25	0.12	256	0.12	0.5	0.12	0.25	2
NV00732	2024-10-24	Urine	F39	PID00581	SRR33403333	SAMN48286633	Clade3	12	3.A.12.G	0.5	2		>256	0.25	0.5	1	0.25	4
NV00733	2023-07-05 21:00:00	Axilla/Groin	F33	PID00582	SRR27135888	SAMN38336487	Clade1	5	1.A.5.B											ERG11: Lys143Arg		B9J08_000401: Gln142*
NV00734	2024-11-07	Urine	F36	PID03518	SRR33405857	SAMN48288253	Clade1	13	1.A.13.A	0.5	2		256	2	2	1	2	4		ERG11: Lys143Arg		B9J08_000401: Gln142*
NV00735	2024-03-28 21:00:00	Axilla/Groin	F39	PID00583	SRR30847373	SAMN43830115	Clade3	10	3.A.10.E
NV00736	2024-07-02 21:00:00	Axilla/Groin	F36	PID00585	SRR33381024	SAMN48209784	Clade1	8	1.A.8.A											ERG11: Lys143Arg		B9J08_000401: Gln142*
NV00737	2024-07-25 21:00:00	Urine	F36	PID00585	SRR33392039	SAMN48270126	Clade1	8	1.A.8.A	0.25	0.5		128	0.12	0.25	0.12	0.12	1		ERG11: Lys143Arg		B9J08_000401: Gln142*
NV00738	2022-08-29 21:00:00	Axilla/Groin	F36	PID00584	SRR23109039	SAMN32670245	Clade3	10	3.A.10.A
NV00739	2022-08-28 21:00:00	Axilla/Groin	F36	PID00584	SRR23109038	SAMN32670244	Clade3	10	3.A.10.A
NV00740	2022-09-25 21:00:00	Wound	F36	PID00584	SRR23108871	SAMN32670105	Clade3	10	3.A.10.A	1	0.5	0.25	256	0.12	0.25	0.25	0.25	1
NV00741	2023-10-19 21:00:00	Axilla/Groin	F36	PID00584	SRR27607906	SAMN39273852	Clade3	10	3.A.10.A
NV00742	2024-02-06 21:00:00	Wound	F36	PID00584	SRR29280576	SAMN41409358	Clade3	11	3.A.11.B
NV00743	2024-04-11 21:00:00	Surgery Culture	F36	PID00584	SRR30866628	SAMN43829898	Clade3	10	3.A.10.A	0.5	0.25		256	0.12	0.5	0.12	0.12	1
NV00744	2024-05-20 21:00:00	Axilla/Groin	F36	PID00584	SRR30946491	SAMN44245643	Clade3	10	3.A.10.A
NV00745	2024-05-26 21:00:00	Axilla/Groin	F36	PID00584	SRR30946424	SAMN44245453	Clade3	10	3.A.10.A
NV00746	2024-11-05	Wound	F36	PID00584	SRR33405889	SAMN48288260	Clade3	10	3.A.10.A	0.5	2		>256	0.25	1	1	0.5	4
NV00747	2023-10-26 21:00:00	Axilla/Groin	F39	PID01879	SRR27607849	SAMN39273816	Clade3	5	3.A.5.F
NV00748	2024-02-22 21:00:00	Axilla/Groin	F39	PID01879	SRR29280452	SAMN41409459	Clade3	5	3.A.5.F
NV00749	2024-04-21 21:00:00	Axilla/Groin	F36	PID00586	SRR30865473	SAMN43829921	Clade3	10	3.A.10.F
NV00750	2024-11-06	Urine	F38	PID00586	SRR33405898	SAMN48288269	Clade1	1	1.B.1.A	0.25	0.25		128	0.06	0.25	0.12	0.12	0.5		ERG11: Tyr132Phe
NV00751	2023-04-26 21:00:00	Axilla/Groin	F39	PID00587	SRR27636303	SAMN35640892	Clade3	6	3.A.6.E
NV00752	2024-05-08 21:00:00	Axilla/Groin	F10	PID00589	SRR30945920	SAMN44244921	Clade1	11	1.A.11.B											ERG11: Lys143Arg		B9J08_000401: Gln142*
NV00754	2022-10-04 21:00:00	Skin Swab	F40	PID00592	SRR23108832	SAMN32670098	Clade3	3	3.A.3.M
NV00755	2023-07-01	Urine	F39	PID00592	SRR27130943	SAMN38336607	Clade3	3	3.A.3.M	0.5	1	0.5	256	0.12	0.5		0.12	2
NV00756	2023-10-22 21:00:00	Axilla/Groin	F36	PID00593	SRR27607867	SAMN39273834	Clade1	13	1.A.13.C										FKS1: Asp642Tyr	ERG11: Lys143Arg		B9J08_000401: Gln142*
NV00757	2023-10-22 21:00:00	Skin Swab	F36	PID00593	SRR27645386	SAMN39504813	Clade1	13	1.A.13.C	0.25	1		>256	2	1	0.5	0.5	4	FKS1: Asp642Tyr	ERG11: Lys143Arg		B9J08_000401: Gln142*
NV00758	2023-09-18 21:00:00	Axilla/Groin	F36	PID00596	SRR27645450	SAMN39504777	Clade3	3	3.A.3.C
NV00759	2023-11-14 21:00:00	Axilla/Groin	F28	PID00597	SRR27645356	SAMN39504635	Clade3	4	3.A.4.K
NV00761	2023-11-22 21:00:00	Skin Swab	F36	PID00598	SRR27607885	SAMN39273735	Clade3	5	3.A.5.C
NV00762	2022-10-26 21:00:00	Axilla/Groin	F39	PID00599	SRR23137872	SAMN32797977	Clade3	4	3.A.4.P
NV00763	2022-10-27 21:00:00	Axilla/Groin	F39	PID00599	SRR23137871	SAMN32797976	Clade3	4	3.A.4.P
NV00764	2024-04-22 21:00:00	Blood	F36	PID00600	SRR30844555	SAMN43817330	Clade1	3	1.B.3.A	0.5	0.12		128	0.03	0.12	0.12	0.06	0.25		ERG11: Tyr132Phe
NV00765	2023-02-06 21:00:00	Axilla/Groin	F14	PID00601	SRR23920764	SAMN33829979	Clade3	8	3.A.8.E
NV00766	2023-08-06 21:00:00	Axilla/Groin	F35	PID00602	SRR27135677	SAMN38336552	Clade3	8	3.A.8.B
NV00767	2022-11-06 21:00:00	Axilla/Groin	F06	PID00603	SRR23920635	SAMN33829856	Clade3	5	3.A.5.E
NV00768	2022-07-24 21:00:00	Skin	F36	PID00603	SRR23958480	SAMN30468054	Clade1	2	1.A.2.C	0.25	0.5	0.12	256	0.12	0.12	0.12	0.06	1		ERG11: Lys143Arg		B9J08_000401: Gln142*
NV00769	2022-09-24 21:00:00	Skin Swab	F36	PID00603	SRR23108880	SAMN32670114	Clade1	2	1.A.2.C	0.25	0.5	0.25	256	0.25	0.25	0.25	0.12	1		ERG11: Lys143Arg		B9J08_000401: Gln142*
NV00770	2023-03-11 21:00:00	Urine	F36	PID00603	SRR27636476	SAMN35641033	Clade1	2	1.A.2.C										FKS1: Ser639Tyr	ERG11: Lys143Arg		B9J08_000401: Gln142*
NV00771	2023-09-13 21:00:00	Wound	F36	PID00603	SRR27135741	SAMN38336573	Clade1	2	1.A.2.C											ERG11: Lys143Arg		B9J08_000401: Gln142*
NV00772	2022-11-06 21:00:00	Blood	F41	PID00603	SRR23137843	SAMN32797948	Clade1	2	1.A.2.C	0.25	1	0.5	256	0.25	0.5	0.25	0.25	1		ERG11: Lys143Arg		B9J08_000401: Gln142*
NV00773	2022-08-10 21:00:00	Axilla/Groin	F29	PID03399	SRR23109215	SAMN32670335	Clade3	3	3.A.3.F
NV00774	2024-12-02	Urine	F38	PID03519	SRR33405805	SAMN48288201	Clade1	11	1.A.11.C	0.25	0.5		>256	2	1	0.25	0.25	4		ERG11: Lys143Arg		B9J08_000401: Gln128Lys, Gln142*
NV00775	2022-09-20 21:00:00	Skin Swab	F40	PID00604	SRR23108989	SAMN32670163	Clade3	4	3.A.4.D
NV00776	2022-11-19 21:00:00	Axilla/Groin	F12	PID00605	SRR23137822	SAMN32797927	Clade3	5	3.A.5.B
NV00777	2024-02-29 21:00:00	Axilla/Groin	F12	PID00606	SRR29280509	SAMN41409489	Clade3	12	3.A.12.H
NV00778	2023-10-09 21:00:00	Not Indicated	F39	PID00607	SRR27645256	SAMN39504877	Clade1	2	1.A.2.A											ERG11: Lys143Arg		B9J08_000401: Gln142*
NV00779	2022-12-02 21:00:00	Axilla/Groin	F39	PID00608	SRR23137787	SAMN32797894	Clade1	2	1.A.2.I											ERG11: Lys143Arg		B9J08_000401: Gln142*
NV00780	2022-12-10 21:00:00	Axilla/Groin	F39	PID00608	SRR23137768	SAMN32797875	Clade1	2	1.A.2.I											ERG11: Lys143Arg		B9J08_000401: Gln142*
NV00781	2023-02-19 21:00:00	Axilla/Groin	F14	PID00609	SRR27636431	SAMN35641117	Clade3	6	3.A.6.E
NV00782	2024-02-28 21:00:00	Axilla/Groin	F36	PID00612	SRR29280508	SAMN41409488	Clade3	13	3.A.13.E
NV00783	2023-06-12 21:00:00	Axilla/Groin	F02	PID00613	SRR27135817	SAMN38336750	Clade3	3	3.A.3.H
NV00784	2022-10-07 21:00:00	Not Indicated	F12	PID00614	SRR23108927	SAMN32670065	Clade3	5	3.A.5.E
NV00785	2022-10-02 21:00:00	Axilla/Groin	F39	PID00614	SRR23108833	SAMN32670099	Clade3	5	3.A.5.E
NV00786	2022-09-29 21:00:00	Urine	F41	PID00614	SRR23108812	SAMN32670078	Clade3	13	3.A.13.D	0.5	0.5	0.25	256	0.12	0.25	0.25	0.12	2			FUR1: Val103Gly
NV00787	2024-01-30 21:00:00	Axilla/Groin	F36	PID00615	SRR30844169	SAMN43817417	Clade3	13	3.A.13.M
NV00788	2024-01-31 21:00:00	Axilla/Groin	F36	PID00615	SRR30844160	SAMN43817408	Clade3	13	3.A.13.L
NV00789	2024-04-08 21:00:00	Wound	F39	PID00616	SRR30865505	SAMN43829953	Clade1	10	1.A.10.B	0.25	0.5		>256	1	0.5	0.12	0.25	2		ERG11: Lys143Arg		B9J08_000401: Gln142*
NV00790	2023-02-06 21:00:00	Axilla/Groin	F14	PID00617	SRR27636532	SAMN35641153	Clade3	3	3.A.3.A
NV00791	2022-11-26 21:00:00	Axilla/Groin	F02	PID00618	SRR23137809	SAMN32797914	Clade3	5	3.A.5.E
NV00792	2022-12-29 21:00:00	Wound	F36	PID00618	SRR23248997	SAMN32934626	Clade3	2	3.A.2.D	0.25	0.12	0.06	256	0.12	0.5	0.12	0.12	4
NV00793	2023-01-13 21:00:00	Trachea	F36	PID00618	SRR23920665	SAMN33829936	Clade3	5	3.A.5.E	0.25	0.12	0.12	64	0.12	0.5	0.25	0.12	2
NV00794	2023-09-16 21:00:00	Blood	F36	PID00618	SRR27645433	SAMN39504701	Clade3	4	3.A.4.B	1	1	0.25	>256	0.25	0.5	0.25	0.5	2
NV00795	2024-07-12 21:00:00	Wound	F36	PID00619	SRR33388482	SAMN48264957	Clade1	5	1.B.5.A	0.5	0.12		64	0.03	0.06	0.12	0.06	0.25		ERG11: Tyr132Phe
NV00796	2022-04-19 21:00:00	Axilla/Groin	F13	PID03356	SRR23109129	SAMN32670367	Clade3	8	3.A.8.B
NV00797	2022-05-30 21:00:00	Wound	F36	PID00620	SRR20081645	SAMN29634998	Clade3	8	3.A.8.E	0.5	1	0.25	>256	0.25	0.5	0.25	0.25	2
NV00798	2024-06-13 21:00:00	Axilla/Groin	F23	PID00621	SRR30946903	SAMN44246088	Clade3	1	3.A.1.A
NV00799	2024-06-03 21:00:00	Axilla/Groin	F36	PID00621	SRR30946456	SAMN44245608	Clade3	11	3.A.11.H
NV00800	2023-10-28 21:00:00	Blood	F39	PID00623	SRR27607838	SAMN39273805	Clade3	6	3.A.6.E	1	1		>256	0.25	0.25	0.5	0.12	2
NV00801	2023-10-29 21:00:00	Axilla/Groin	F39	PID00623	SRR27645355	SAMN39504666	Clade1	2	1.A.2.H											ERG11: Lys143Arg
NV00802	2024-03-29 21:00:00	Axilla/Groin	F30	PID00624	SRR30847348	SAMN43830090	Clade3	13	3.A.13.M
NV00803	2024-05-01 21:00:00	Axilla/Groin	F12	PID00626	SRR30866578	SAMN43829848	Clade3	10	3.A.10.E
NV00804	2024-05-01 21:00:00	Axilla/Groin	F12	PID00626	SRR30866577	SAMN43829847	Clade1	8	1.A.8.A											ERG11: Lys143Arg		B9J08_000401: Gln142*
NV00805	2024-04-30 21:00:00	Wound	F39	PID00626	SRR30866560	SAMN43829830	Clade3	12	3.A.12.C	1	0.25		>256	0.12	0.25	0.12	0.25	1
NV00806	2024-12-02	Skin Swab	F31	PID00626	SRR33405802	SAMN48288198	Clade1	8	1.A.8.A	1	2		>256	0.5	1	0.5	0.5	2		ERG11: Lys143Arg		B9J08_000401: Gln142*
NV00807	2024-02-28 21:00:00	Axilla/Groin	F36	PID00627	SRR30844589	SAMN43817294	Clade3	4	3.A.4.K
NV00808	2024-04-18 21:00:00	Wound	F36	PID00627	SRR30865458	SAMN43829906	Clade3	4	3.A.4.K	0.5	0.5		256	0.12	0.5	0.5	0.25	2
NV00809	2024-03-22 21:00:00	Axilla/Groin	F28	PID00627	SRR30945866	SAMN44244862	Clade3	4	3.A.4.K
NV00810	2024-07-17 21:00:00	Axilla/Groin	F13	PID00628	SRR33388572	SAMN48264987	Clade1	11	1.A.11.C											ERG11: Lys143Arg		B9J08_000401: Gln142*
NV00811	2023-11-27 21:00:00	Axilla/Groin	F33	PID00629	SRR27645298	SAMN39504622	Clade3	11	3.A.11.J
NV00812	2023-11-27 21:00:00	Axilla/Groin	F33	PID00629	SRR27645292	SAMN39504613	Clade3	11	3.A.11.J
NV00813	2024-01-06 21:00:00	Axilla/Groin	F36	PID00633	SRR29364632	SAMN41409129	Clade3	6	3.A.6.B
NV00814	2023-09-06 21:00:00	Axilla/Groin	F12	PID00632	SRR27135754	SAMN38336778	Clade3	4	3.A.4.G
NV00815	2022-05-12 21:00:00	Wound	F31	PID00635	SRR19738704	SAMN29101416	Clade3	5	3.A.5.E	0.5	1	0.25	>256	0.12	0.5	0.25	0.25	2
NV00816	2023-09-16 21:00:00	Axilla/Groin	F36	PID00636	SRR27645477	SAMN39504757	Clade3	12	3.A.12.E
NV00817	2023-06-03 21:00:00	Skin Swab	F36	PID00637	SRR27135935	SAMN38336445	Clade3	3	3.A.3.F
NV00818	2022-08-10 21:00:00	Axilla/Groin	F12	PID00637	SRR23109219	SAMN32670339	Clade1	3	1.A.3.A											ERG11: Lys143Arg	FUR1: Gly106Asp	B9J08_000401: Gln142*
NV00819	2023-07-15 21:00:00	Axilla/Groin	F39	PID00638	SRR27135648	SAMN38336274	Clade1	13	1.A.13.F											ERG11: Lys143Arg	FUR1: Glu64*	B9J08_000401: Gln142*
NV00820	2024-06-02 21:00:00	Axilla/Groin	F02	PID00639	SRR30946397	SAMN44245426	Clade3	13	3.A.13.M
NV00821	2024-04-09 21:00:00	Axilla/Groin	F36	PID00641	SRR30865536	SAMN43829984	Clade3	6	3.A.6.E
NV00822	2024-04-09 21:00:00	Bone	F36	PID00641	SRR30865500	SAMN43829948	Clade3	6	3.A.6.E	0.5	0.25		256	0.12	0.25	0.06	0.06	2
NV00823	2024-04-18 21:00:00	Axilla/Groin	F36	PID00641	SRR30865479	SAMN43829927	Clade1	3	1.B.3.A											ERG11: Tyr132Phe
NV00824	2024-07-03 21:00:00	Trachea	F36	PID00641	SRR33388492	SAMN48264967	Clade3	6	3.A.6.E	1	0.5		>256	0.5	0.5	0.5	0.25	1
NV00825	2022-09-30 21:00:00	Blood	F36	PID00642	SRR23108810	SAMN32670076	Clade3	8	3.A.8.A	1	0.12	0.12	256	0.12	0.25	0.12	0.12	1
NV00826	2022-10-04 21:00:00	Skin Swab	F40	PID00643	SRR23108816	SAMN32670082	Clade3	3	3.A.3.F
NV00827	2022-08-08 21:00:00	Catheter Tip	F25	PID00643	SRR23109107	SAMN32670313	Clade3	3	3.A.3.F	0.5	0.12	0.06	256	0.03	0.03		0.02	0.5
NV00828	2024-11-16	Wound	F36	PID03520	SRR33405839	SAMN48288235	Clade3	7	3.A.7.B	1	1		>256	0.25	1	0.5	0.25	4
NV00829	2023-04-16 21:00:00	Axilla/Groin	F29	PID00644	SRR27636452	SAMN35640899	Clade3	12	3.A.12.B
NV00830	2023-04-10 21:00:00	Axilla/Groin	F36	PID00645	SRR27636322	SAMN35640974	Clade3	4	3.A.4.N
NV00831	2024-07-18 21:00:00	Axilla/Groin	F09	PID00646	SRR33388470	SAMN48264945	Clade3	4	3.A.4.F
NV00832	2024-07-18 21:00:00	Axilla/Groin	F09	PID00646	SRR30947141	SAMN44246235	Clade1	13	1.A.13.A											ERG11: Lys143Arg		B9J08_000401: Gln142*
NV00833	2024-05-19 21:00:00	Axilla/Groin	F12	PID00646	SRR30946493	SAMN44245645	Clade3	4	3.A.4.F
NV00834	2023-11-24 21:00:00	Wound	F36	PID00647	SRR27645290	SAMN39504675	Clade1	13	1.A.13.F	0.25	0.5		>256	0.5	0.5	0.12	0.25	4		ERG11: Lys143Arg	FUR1: Glu64*	B9J08_000401: Gln142*
NV00835	2023-11-24 21:00:00	Skin Swab	F36	PID00647	SRR27645289	SAMN39504615	Clade1	13	1.A.13.F	0.25	0.25		>256	0.25	0.5	0.12	0.25	2		ERG11: Lys143Arg	FUR1: Glu64*	B9J08_000401: Gln142*
NV00836	2023-12-14 21:00:00	Blood	F36	PID00647	SRR28069448	SAMN40079110	Clade1	13	1.A.13.F	0.5	0.5		>256	0.5	0.5	0.5	0.5	2		ERG11: Lys143Arg	FUR1: Glu64*	B9J08_000401: Gln142*
NV00837	2024-05-24 21:00:00	Axilla/Groin	F36	PID00648	SRR30946229	SAMN44245299	Clade3	12	3.A.12.D
NV00838	2023-05-15 21:00:00	Skin Swab	F36	PID00649	SRR27135838	SAMN38336396	Clade3	4	3.A.4.O
NV00839	2023-05-10 21:00:00	Axilla/Groin	F12	PID00650	SRR27135847	SAMN38336461	Clade3	3	3.A.3.F
NV00840	2023-10-23 21:00:00	Axilla/Groin	F36	PID00650	SRR27607859	SAMN39273826	Clade3	3	3.A.3.F
NV00841	2022-12-08 21:00:00	Skin Swab	F38	PID00651	SRR23137766	SAMN32797873	Clade3	10	3.A.10.C	0.5	0.5	0.12	128	0.25	0.25	0.25	0.12	2
NV00842	2023-08-17 21:00:00	Axilla/Groin	F10	PID00652	SRR27135865	SAMN38336407	Clade1	11	1.A.11.B											ERG11: Lys143Arg		B9J08_000401: Gln142*
NV00843	2023-08-17 21:00:00	Axilla/Groin	F10	PID00652	SRR27135864	SAMN38336585	Clade3	6	3.A.6.B
NV00844	2024-01-16 21:00:00	Skin Swab	F29	PID00653	SRR29365068	SAMN41409198	Clade3	4	3.A.4.J
NV00845	2023-12-09 21:00:00	Axilla/Groin	F36	PID00654	SRR27718943	SAMN39600305	Clade1	13	1.A.13.B											ERG11: Lys143Arg		B9J08_000401: Gln142*
NV00846	2024-08-04 21:00:00	Axilla/Groin	F36	PID00656	SRR33391981	SAMN48270100	Clade3	4	3.A.4.N
NV00847	2023-09-19 21:00:00	Axilla/Groin	F36	PID00660	SRR27607996	SAMN39273910	Clade3	11	3.A.11.G
NV00848	2022-11-16 21:00:00	Axilla/Groin	F23	PID00659	SRR23137826	SAMN32797931	Clade1	3	1.B.3.A											ERG11: Tyr132Phe
NV00849	2024-03-14 21:00:00	Wound	F15	PID00658	SRR30844563	SAMN43817338	Clade1	13	1.A.13.B	0.25	0.25		>256	0.12	0.25	0.12	0.12	1		ERG11: Lys143Arg	FUR1: Ser84Leu	B9J08_000401: Gln142*
NV00850	2023-06-08 21:00:00	Axilla/Groin	F12	PID00662	SRR27135931	SAMN38336557	Clade3	8	3.A.8.A
NV00851	2023-03-05 21:00:00	Axilla/Groin	F10	PID00663	SRR27636387	SAMN35641073	Clade1	13	1.A.13.F											ERG11: Lys143Arg		B9J08_000401: Gln142*
NV00852	2023-04-13 21:00:00	Axilla/Groin	F14	PID00663	SRR27131022	SAMN38336706	Clade1	13	1.A.13.F											ERG11: Lys143Arg	FUR1: Glu64*	B9J08_000401: Gln142*
NV00853	2023-04-19 21:00:00	Ulcer	F39	PID00663	SRR27135964	SAMN38336353	Clade1	13	1.A.13.F											ERG11: Lys143Arg	FUR1: Glu64*	B9J08_000401: Gln142*
NV00854	2024-02-07 21:00:00	Axilla/Groin	F30	PID00664	SRR29280601	SAMN41409360	Clade3	13	3.A.13.K
NV00855	2024-06-13 21:00:00	Axilla/Groin	F33	PID00664	SRR30946897	SAMN44246082	Clade1	4	1.A.4.C											ERG11: Lys143Arg		B9J08_000401: Gln142*
NV00856	2024-04-04 21:00:00	Axilla/Groin	F36	PID00665	SRR30847312	SAMN43830054	Clade3	12	3.A.12.B
NV00857	2024-03-13 21:00:00	Axilla/Groin	F13	PID00666	SRR30846327	SAMN43817244	Clade3	11	3.A.11.H
NV00858	2024-03-13 21:00:00	Axilla/Groin	F13	PID00666	SRR30846326	SAMN43817243	Clade1	4	1.A.4.E											ERG11: Lys143Arg		B9J08_000401: Gln142*
NV00859	2023-08-07 21:00:00	Axilla/Groin	F39	PID00667	SRR27135674	SAMN38336255	Clade3	4	3.A.4.J
NV00860	2024-03-05 21:00:00	Axilla/Groin	F28	PID00668	SRR30847446	SAMN43830171	Clade3	1	3.A.1.B
NV00861	2024-02-25 21:00:00	Axilla/Groin	F36	PID00669	SRR29280450	SAMN41409472	Clade1	1	1.B.1.A											ERG11: Tyr132Phe
NV00862	2024-03-03 21:00:00	Axilla/Groin	F36	PID00669	SRR30846374	SAMN43817284	Clade1	1	1.B.1.A											ERG11: Tyr132Phe
NV00863	2023-04-16 21:00:00	Wound	F36	PID00670	SRR27636447	SAMN35640912	Clade1	9	1.A.9.A											ERG11: Lys143Arg		B9J08_000401: Gln142*
NV00864	2024-04-24 21:00:00	Axilla/Groin	F30	PID00671	SRR30866622	SAMN43829892	Clade3	12	3.A.12.E
NV00865	2024-03-24 21:00:00	Axilla/Groin	F36	PID00672	SRR30847394	SAMN43830136	Clade3	12	3.A.12.D
NV00866	2024-06-11 21:00:00	Axilla/Groin	F36	PID00672	SRR30946915	SAMN44246100	Clade3	12	3.A.12.D
NV00867	2022-08-25 21:00:00	Blood	F36	PID00674	SRR23109060	SAMN32670266	Clade3	5	3.A.5.E	0.25	0.06	0.06	128	0.06	0.25		0.12	0.5
NV00868	2022-10-10 21:00:00	Wound	F36	PID00674	SRR23108898	SAMN32670036	Clade3	5	3.A.5.E	0.5	0.5	0.25	256	0.12	0.5	0.25	0.25	2
NV00869	2023-07-10 21:00:00	Urine	F36	PID00675	SRR27135658	SAMN38336424	Clade3	12	3.A.12.B	0.25	0.5	0.25	>256	0.5	1		0.25	4	FKS1: Arg641Ser
NV00870	2024-01-28 21:00:00	Axilla/Groin	F30	PID00676	SRR29363961	SAMN41409293	Clade3	12	3.A.12.D
NV00871	2023-09-16 21:00:00	Axilla/Groin	F39	PID00679	SRR27645473	SAMN39504775	Clade3	11	3.A.11.B
NV00872	2022-10-21 21:00:00	Trachea	F36	PID00678	SRR23108763	SAMN32670010	Clade3	2	3.A.2.A	0.5	0.5	0.25	256	0.12	0.25		0.06	2
NV00873	2024-02-24 21:00:00	Axilla/Groin	F12	PID00680	SRR30844111	SAMN43817360	Clade1	4	1.B.4.A											ERG11: Tyr132Phe
NV00874	2024-07-29 21:00:00	Axilla/Groin	F29	PID00682	SRR33391998	SAMN48270117	Clade1	4	1.B.4.A											ERG11: Tyr132Phe
NV00875	2024-04-02 21:00:00	Axilla/Groin	F28	PID00683	SRR30946514	SAMN44245666	Clade3	6	3.A.6.B
NV00876	2024-04-02 21:00:00	Axilla/Groin	F28	PID00683	SRR30946513	SAMN44245665	Clade1	11	1.A.11.A											ERG11: Lys143Arg		B9J08_000401: Gln142*
NV00877	2024-03-08 21:00:00	Axilla/Groin	F39	PID00684	SRR30846356	SAMN43817266	Clade3	10	3.A.10.E
NV00878	2023-11-20 21:00:00	Axilla/Groin	F12	PID00685	SRR27645309	SAMN39504653	Clade3	5	3.A.5.E
NV00879	2023-10-24 21:00:00	Wound	F36	PID00686	SRR27645247	SAMN39504840	Clade1	2	1.B.2.A	0.5	0.25		128	0.06	0.12	0.12	0.06	1
NV00880	2023-10-21 21:00:00	Axilla/Groin	F36	PID00687	SRR27607878	SAMN39273845	Clade3	4	3.A.4.G
NV00881	2023-03-23 21:00:00	Axilla/Groin	F36	PID00688	SRR27636348	SAMN35640925	Clade1	11	1.A.11.B											ERG11: Lys143Arg		B9J08_000401: Gln142*
NV00882	2023-06-22 21:00:00	Axilla/Groin	F36	PID00688	SRR27135910	SAMN38336364	Clade1	11	1.A.11.B											ERG11: Lys143Arg		B9J08_000401: Gln142*
NV00883	2023-01-07 21:00:00	Urine	F41	PID00692	SRR23248977	SAMN32934606	Clade1	3	1.A.3.A	0.25	0.5	0.25	256	0.5	0.5	0.25	0.25	1		ERG11: Lys143Arg	FUR1: Gly106Asp	B9J08_000401: Gln142*
NV00884	2024-09-24	Wound	F36	PID00695	SRR33403301	SAMN48286689	Clade1	1	1.B.1.A	0.5	0.25		32	0.03	0.006	0.12	0.06	0.25		ERG11: Tyr132Phe
NV00885	2024-09-24	Wound	F36	PID00695	SRR33403282	SAMN48286670	Clade1	1	1.B.1.A	1	0.25		64	0.03	0.12	0.12	0.06	0.25		ERG11: Tyr132Phe
NV00886	2024-10-26	Wound	F36	PID00695	SRR33403327	SAMN48286627	Clade1	1	1.B.1.A	0.25	0.25		128	0.06	0.5	0.25	0.25	0.5		ERG11: Tyr132Phe
NV00887	2023-11-10 21:00:00	Wound	F36	PID00697	SRR27607946	SAMN39273764	Clade1	10	1.A.10.B											ERG11: Lys143Arg		B9J08_000401: Gln142*
NV00888	2023-11-09 21:00:00	Blood	F36	PID00697	SRR27645220	SAMN39504614	Clade1	10	1.A.10.B											ERG11: Lys143Arg		B9J08_000401: Gln142*
NV00889	2024-04-25 21:00:00	Axilla/Groin	F02	PID00698	SRR30866617	SAMN43829887	Clade3	11	3.A.11.D
NV00890	2024-03-24 21:00:00	Axilla/Groin	F33	PID00699	SRR30847397	SAMN43830139	Clade3	10	3.A.10.E
NV00891	2022-12-26 21:00:00	Axilla/Groin	F09	PID00700	SRR23137731	SAMN32797838	Clade3	10	3.A.10.C
NV00892	2024-06-09 21:00:00	Axilla/Groin	F36	PID00701	SRR30946935	SAMN44246120	Clade1	8	1.A.8.A											ERG11: Lys143Arg		B9J08_000401: Gln142*
NV00893	2024-06-12 21:00:00	Axilla/Groin	F36	PID00701	SRR30946902	SAMN44246087	Clade1	8	1.A.8.A											ERG11: Lys143Arg		B9J08_000401: Gln142*
NV00894	2022-05-30 21:00:00	Blood	F38	PID00703	SRR20081647	SAMN29635000	Clade3	5	3.A.5.E	0.25	1	0.5	>256	0.5	0.5	0.25	0.25	2
NV00895	2022-10-29 21:00:00	Pleural Fluid	F38	PID00703	SRR23108850	SAMN32669988	Clade3	4	3.A.4.B	0.5	0.5	0.25	256	0.12	0.5		0.25	2
NV00896	2022-12-13 21:00:00	Skin Swab	F40	PID00704	SRR23137762	SAMN32797869	Clade3	3	3.A.3.D
NV00897	2022-09-01 21:00:00	Axilla/Groin	F19	PID00704	SRR23109031	SAMN32670237	Clade3	3	3.A.3.D
NV00898	2023-12-06 21:00:00	Axilla/Groin	F28	PID00706	SRR28069462	SAMN40079124	Clade3	8	3.A.8.C
NV00899	2024-01-03 21:00:00	Skin Swab	F28	PID00706	SRR29364604	SAMN41409116	Clade3	13	3.A.13.D												FUR1: Val103Gly
NV00900	2023-10-08 21:00:00	Axilla/Groin	F33	PID00707	SRR27607968	SAMN39273882	Clade3	11	3.A.11.A
NV00901	2024-02-29 21:00:00	Axilla/Groin	F36	PID00709	SRR30844588	SAMN43817293	Clade3	13	3.A.13.M
NV00902	2024-03-04 21:00:00	Axilla/Groin	F36	PID00709	SRR29278651	SAMN41409514	Clade3	13	3.A.13.M
NV00903	2024-03-28 21:00:00	Axilla/Groin	F36	PID00711	SRR30847363	SAMN43830105	Clade1	1	1.B.1.A										FKS1: Arg1354His	ERG11: Tyr132Phe
NV00904	2023-05-24 21:00:00	Sputum	F38	PID00713	SRR27135948	SAMN38336576	Clade3	6	3.A.6.E	0.5	0.5	0.5	>256	0.25	0.5	0.25	0.12	4
NV00905	2024-07-11 21:00:00	Axilla/Groin	F36	PID00714	SRR33388612	SAMN48265055	Clade1	4	1.A.4.D											ERG11: Lys143Arg		B9J08_000401: Gln142*
NV00906	2024-07-24 21:00:00	Peritoneal Fluid	F36	PID00714	SRR33388527	SAMN48264912	Clade1	4	1.A.4.D	0.5	0.5		256	0.25	0.5	0.25	0.25	1		ERG11: Lys143Arg		B9J08_000401: Gln142*
NV00907	2024-07-24 21:00:00	Sputum	F36	PID00714	SRR33392063	SAMN48270150	Clade1	4	1.A.4.D	0.25	0.25		64	0.25	0.5	0.12	0.25	1		ERG11: Lys143Arg		B9J08_000401: Gln142*
NV00908	2022-07-25 21:00:00	Axilla/Groin	F33	PID00716	SRR23958482	SAMN30468056	Clade3	3	3.A.3.F
NV00909	2022-10-03 21:00:00	Axilla/Groin	F28	PID00717	SRR23108867	SAMN32670101	Clade3	4	3.A.4.D
NV00910	2023-12-20 21:00:00	Axilla/Groin	F33	PID00718	SRR28069395	SAMN40079086	Clade1	3	1.A.3.A											ERG11: Lys143Arg		B9J08_000401: Gln142*
NV00911	2023-10-12 21:00:00	Axilla/Groin	F39	PID00719	SRR27607850	SAMN39273817	Clade3	6	3.A.6.E
NV00912	2023-10-29 21:00:00	Blood	F39	PID00719	SRR27607833	SAMN39273800	Clade3	6	3.A.6.E	1	0.5		256	0.25	0.5	0.25	0.25	1
NV00913	2023-08-27 21:00:00	Axilla/Groin	F29	PID00720	SRR27130918	SAMN38336732	Clade3	13	3.A.13.A
NV00914	2023-08-10 21:00:00	Urine	F39	PID00720	SRR27130872	SAMN38336609	Clade3	13	3.A.13.A	1	0.5	0.25	>256	0.25	0.5	0.25	0.25	4
NV00915	2022-11-22 21:00:00	Bronchial Washing	F15	PID00721	SRR23137777	SAMN32797884	Clade1	11	1.A.11.C											ERG11: Lys143Arg		B9J08_000401: Gln142*
NV00916	2022-11-25 21:00:00	Urine	F41	PID00721	SRR23137802	SAMN32797907	Clade1	11	1.A.11.C	0.25	1	0.5	>256	2	2	0.5	1	8		ERG11: Lys143Arg		B9J08_000401: Gln142*
NV00917	2023-03-08 21:00:00	Axilla/Groin	F14	PID00722	SRR27636378	SAMN35641063	Clade3	4	3.A.4.D
NV00918	2023-04-05 21:00:00	Axilla/Groin	F35	PID00722	SRR27636251	SAMN35640985	Clade3	4	3.A.4.D
NV00919	2024-03-22 21:00:00	Axilla/Groin	F33	PID00723	SRR30847430	SAMN43830155	Clade1	2	1.A.2.H											ERG11: Lys143Arg		B9J08_000401: Gln142*
NV00920	2024-04-26 21:00:00	Axilla/Groin	F39	PID00723	SRR30868000	SAMN43829801	Clade1	2	1.A.2.H											ERG11: Lys143Arg		B9J08_000401: Gln142*
NV00921	2024-05-13 21:00:00	Wound	F36	PID00726	SRR30946242	SAMN44245344	Clade3	13	3.A.13.K	1	0.5		>256	0.25	0.25	0.25	0.12	1
NV00922	2024-06-05 21:00:00	Axilla/Groin	F12	PID00727	SRR30946374	SAMN44245403	Clade1	10	1.A.10.B											ERG11: Lys143Arg		B9J08_000401: Gln142*
NV00923	2023-08-24 21:00:00	Axilla/Groin	F29	PID00728	SRR27135629	SAMN38336490	Clade3	4	3.A.4.J
NV00924	2024-03-13 21:00:00	Axilla/Groin	F12	PID00729	SRR30846323	SAMN43817240	Clade3	12	3.A.12.D
NV00926	2022-11-07 21:00:00	Skin Swab	F36	PID00731	SRR23137839	SAMN32797944	Clade3	3	3.A.3.M	0.5	0.5	0.25	256	0.06	0.25	0.25	0.06	2
NV00927	2022-05-26	Surgery Culture	F31	PID03521	SRR20081628	SAMN29634981	Clade3	5	3.A.5.E	0.5	0.5	0.25	256	0.12	0.25	0.12	0.12	2
NV00928	2024-05-26 21:00:00	Axilla/Groin	F36	PID00733	SRR30946473	SAMN44245625	Clade3	4	3.A.4.A
NV00929	2024-07-24 21:00:00	Wound	F36	PID00733	SRR33392062	SAMN48270149	Clade3	4	3.A.4.A	0.5	0.25		64	0.12	0.5	0.25	0.25	1
NV00930	2022-11-10 21:00:00	Axilla/Groin	F39	PID00735	SRR23137835	SAMN32797940	Clade3	6	3.A.6.D
NV00931	2022-11-30 21:00:00	Blood	F41	PID00735	SRR23137794	SAMN32797899	Clade3	10	3.A.10.A	1	1	0.25	256	0.25	0.5	0.25	0.25	2
NV00932	2024-03-11 21:00:00	Wound	F36	PID00736	SRR29278635	SAMN41409522	Clade3	8	3.A.8.C	0.25	0.12		>256	0.25	0.25	0.06	0.12	1
NV00933	2024-01-05 21:00:00	Axilla/Groin	F36	PID00738	SRR29364631	SAMN41409127	Clade3	4	3.A.4.J
NV00934	2024-01-06 21:00:00	Axilla/Groin	F36	PID00738	SRR29364629	SAMN41409130	Clade3	13	3.A.13.M
NV00935	2024-07-03 21:00:00	Axilla/Groin	F28	PID00739	SRR33381026	SAMN48209730	Clade1	3	1.A.3.E											ERG11: Lys143Arg		B9J08_000401: Gln142*
NV00936	2024-04-11 21:00:00	Blood	F36	PID00741	SRR30847414	SAMN43830011	Clade3	13	3.A.13.M	0.5	0.25		256	0.12	0.5	0.12	0.12	1
NV00937	2024-04-01 21:00:00	Axilla/Groin	F36	PID00741	SRR30865547	SAMN43829995	Clade3	13	3.A.13.M
NV00938	2024-04-11 21:00:00	Blood	F36	PID00741	SRR30847411	SAMN43830008	Clade3	13	3.A.13.M	0.5	0.25		256	0.12	0.25	0.12	0.06	2
NV00939	2023-10-30 21:00:00	Axilla/Groin	F36	PID00742	SRR27645242	SAMN39504652	Clade1	2	1.B.2.A											ERG11: Tyr132Phe
NV00940	2024-02-09 21:00:00	Axilla/Groin	F39	PID00742	SRR29280591	SAMN41409382	Clade1	2	1.B.2.A											ERG11: Tyr132Phe
NV00941	2023-01-26 21:00:00	Axilla/Groin	F33	PID00743	SRR23920695	SAMN33829958	Clade3	6	3.A.6.D
NV00942	2023-04-28 21:00:00	Bronchial Washing	F36	PID00744	SRR27135851	SAMN38336384	Clade3	6	3.A.6.C
NV00943	2022-06-07 21:00:00	Skin	F40	PID00746	SRR23958554	SAMN30468128	Clade3	3	3.A.3.D
NV00944	2024-04-29 21:00:00	Bone	F36	PID00747	SRR30945924	SAMN44244925	Clade3	11	3.A.11.J	1	0.25		128	0.12	0.25	0.12	0.12	1
NV00945	2024-08-03 21:00:00	Axilla/Groin	F33	PID00748	SRR33391995	SAMN48270114	Clade1	5	1.B.5.A											ERG11: Tyr132Phe
NV00946	2023-04-06 21:00:00	Wound	F36	PID00749	SRR27636337	SAMN35640870	Clade3	6	3.A.6.E	1	0.25	0.12	256	0.12	0.25	0.25	0.12	2
NV00947	2023-12-13 21:00:00	Axilla/Groin	F36	PID00750	SRR27718934	SAMN39600302	Clade1	13	1.A.13.E											ERG11: Lys143Arg		B9J08_000401: Gln142*
NV00948	2024-07-14 21:00:00	Axilla/Groin	F33	PID00751	SRR33388589	SAMN48265032	Clade1	3	1.A.3.D											ERG11: Lys143Arg		B9J08_000401: Gln142*
NV00950	2024-04-14 21:00:00	Urine	F36	PID00755	SRR30865488	SAMN43829936	Clade1	8	1.A.8.A	0.25	0.25		>256	0.5	0.5	0.06	0.12	2		ERG11: Lys143Arg		B9J08_000401: Gln142*
NV00951	2024-11-23	Wound	F36	PID03522	SRR33405827	SAMN48288223	Clade1	13	1.A.13.D	0.5	1		>256	0.12	0.25	0.5	0.12	1		ERG11: Lys143Arg	FUR1: Gln16*	B9J08_000401: Gln142*
NV00952	2024-11-23	Wound	F36	PID03522	SRR33405819	SAMN48288215	Clade1	13	1.A.13.D	0.25	0.5		256	0.5	0.5	0.12	0.25	2		ERG11: Lys143Arg	FUR1: Gln16*	B9J08_000401: Gln142*
NV00953	2022-05-09 21:00:00	Skin	F31	PID00756	SRR19738710	SAMN29101421	Clade3	5	3.A.5.G	0.25	0.5	0.25	8	0.03	0.06	0.5	0.06	0.02
NV00954	2024-02-16 21:00:00	Axilla/Groin	F10	PID00758	SRR29280545	SAMN41409426	Clade3	5	3.A.5.F
NV00955	2024-02-18 21:00:00	Axilla/Groin	F10	PID00758	SRR30844612	SAMN43817317	Clade3	5	3.A.5.F
NV00956	2024-04-09 21:00:00	Axilla/Groin	F10	PID00761	SRR30847294	SAMN43830036	Clade3	8	3.A.8.C
NV00957	2024-01-24 21:00:00	Axilla/Groin	F33	PID00762	SRR29363996	SAMN41409264	Clade1	3	1.A.3.D											ERG11: Lys143Arg		B9J08_000401: Gln142*
NV00958	2023-10-05 21:00:00	Not Indicated	F36	PID00765	SRR27607978	SAMN39273892	Clade3	13	3.A.13.L
NV00959	2023-10-11 21:00:00	Wound	F36	PID00765	SRR27645406	SAMN39504812	Clade3	13	3.A.13.L	0.25	0.5	0.25	>256	0.25	0.5	0.5	0.25	2
NV00960	2023-11-15 21:00:00	Skin Swab	F36	PID00765	SRR27607933	SAMN39273751	Clade3	13	3.A.13.L
NV00961	2024-01-15 21:00:00	Wound	F38	PID00765	SRR29365110	SAMN41409190	Clade1	3	1.A.3.C	0.25	1		>256	0.25	0.5	0.25	0.12	2		ERG11: Lys143Arg		B9J08_000401: Gln142*
NV00962	2024-04-12 21:00:00	Axilla/Groin	F13	PID00767	SRR30847424	SAMN43830021	Clade3	12	3.A.12.B
NV00963	2024-04-12 21:00:00	Axilla/Groin	F13	PID00767	SRR30847423	SAMN43830020	Clade1	12	1.A.12.C											ERG11: Lys143Arg	FUR1: Arg101Leu	B9J08_000401: Gln142*
NV00964	2023-01-29 21:00:00	Bronchial Lavage	F36	PID00768	SRR23920668	SAMN33829920	Clade3	3	3.A.3.B	1	0.25	0.12	256	0.25	0.5	0.25	0.12	2
NV00965	2023-12-27 21:00:00	Skin Swab	F28	PID00769	SRR29364647	SAMN41409090	Clade3	1	3.A.1.D
NV00966	2022-08-17 21:00:00	Skin Swab	F40	PID00770	SRR23137859	SAMN32797964	Clade3	2	3.A.2.D
NV00967	2023-11-03 21:00:00	Tissue	F38	PID00771	SRR27607962	SAMN39273780	Clade1	2	1.A.2.H	0.5	0.5		>256	1	1	0.5	1	2		ERG11: Lys143Arg
NV00968	2022-11-21 21:00:00	Axilla/Groin	F33	PID00772	SRR23137816	SAMN32797921	Clade3	4	3.A.4.J
NV00969	2023-09-19 21:00:00	Axilla/Groin	F36	PID00773	SRR27607997	SAMN39273911	Clade3	5	3.A.5.E
NV00970	2024-06-12 21:00:00	Axilla/Groin	F36	PID00773	SRR30946912	SAMN44246097	Clade1	3	1.A.3.E											ERG11: Lys143Arg		B9J08_000401: Gln142*
NV00971	2022-09-20 21:00:00	Skin Swab	F40	PID00774	SRR23109158	SAMN32670150	Clade3	5	3.A.5.E
NV00972	2022-08-02 21:00:00	Wound	F36	PID00774	SRR23109226	SAMN32670346	Clade3	5	3.A.5.E	0.13	0.25	0.12	256	0.12	0.25	0.12	0.12	1
NV00973	2023-06-05 21:00:00	Blood	F25	PID00775	SRR27130982	SAMN38336661	Clade1	4	1.B.4.A	1	0.25		64	0.03	0.06	0.12	0.03	0.25
NV00974	2023-06-05 21:00:00	Blood	F25	PID00775	SRR27135819	SAMN38336372	Clade1	13	1.A.13.D	0.5	1		>256	1	0.5	0.25	0.5	2		ERG11: Lys143Arg	FUR1: Gln16*	B9J08_000401: Gln142*
NV00975	2023-06-07 21:00:00	Catheter Tip	F25	PID00775	SRR27135800	SAMN38336262	Clade1	13	1.A.13.D	0.5	1	0.25	256	1	0.5		0.25	2		ERG11: Lys143Arg	FUR1: Gln16*	B9J08_000401: Gln142*
NV00976	2023-02-23 21:00:00	Urine	F36	PID00778	SRR27131023	SAMN38336628	Clade3	4	3.A.4.H	1	0.5	0.5	256	0.25	0.25	0.25	0.12	1
NV00977	2024-08-08 21:00:00	Blood	F36	PID00780	SRR33392029	SAMN48270059	Clade1	2	1.B.2.A	1	0.25		64	0.03	0.06	0.06	0.015	0.25		ERG11: Tyr132Phe
NV00978	2024-08-09 21:00:00	Trachea	F36	PID00780	SRR33392027	SAMN48270057	Clade1	2	1.B.2.A	1	0.25		64	0.03	0.12	0.12	0.03	0.5		ERG11: Tyr132Phe
NV00979	2023-03-26 21:00:00	Axilla/Groin	F33	PID00785	SRR27636341	SAMN35640996	Clade3	3	3.A.3.L
NV00980	2024-06-16 21:00:00	Axilla/Groin	F36	PID00786	SRR30944797	SAMN44243793	Clade3	6	3.A.6.B
NV00981	2024-06-23 21:00:00	Axilla/Groin	F36	PID00786	SRR33370033	SAMN48199607	Clade3	6	3.A.6.B
NV00982	2023-09-11 21:00:00	Axilla/Groin	F29	PID00784	SRR27645492	SAMN39504786	Clade3	3	3.A.3.C
NV00983	2024-07-19 21:00:00	Urine	F39	PID00787	SRR33392054	SAMN48270141	Clade1	4	1.A.4.D	0.5	0.25		64	0.12	0.25	0.25	0.12	1		ERG11: Lys143Arg		B9J08_000401: Gln142*
NV00984	2024-07-11 21:00:00	Axilla/Groin	F28	PID00789	SRR33388583	SAMN48264998	Clade1	13	1.A.13.F											ERG11: Lys143Arg	FUR1: Glu64*	B9J08_000401: Gln142*
NV00985	2024-06-28 21:00:00	Wound	F36	PID00789	SRR33381037	SAMN48209741	Clade1	13	1.A.13.F	0.25	0.25		>256	1	2	0.5	1	0.5		ERG11: Lys143Arg	FUR1: Glu64*	B9J08_000401: Gln142*
NV00986	2024-06-05 21:00:00	Axilla/Groin	F33	PID00792	SRR30946950	SAMN44246135	Clade3	10	3.A.10.D
NV00987	2024-03-22 21:00:00	Axilla/Groin	F10	PID00793	SRR30847434	SAMN43830159	Clade3	3	3.A.3.J
NV00988	2024-02-16 21:00:00	Axilla/Groin	F39	PID00795	SRR29280541	SAMN41409427	Clade1	3	1.B.3.A											ERG11: Tyr132Phe
NV00989	2023-12-05 21:00:00	Axilla/Groin	F12	PID00798	SRR28069461	SAMN40079123	Clade3	11	3.A.11.E
NV00990	2023-10-23 21:00:00	Axilla/Groin	F28	PID00798	SRR27607854	SAMN39273821	Clade3	11	3.A.11.E
NV00991	2023-11-22 21:00:00	Skin Swab	F38	PID00798	SRR27607888	SAMN39273738	Clade3	11	3.A.11.E	1	0.5		256	0.12	0.25	0.25	0.12	1
NV00992	2024-06-23 21:00:00	Axilla/Groin	F36	PID00799	SRR33370026	SAMN48199600	Clade3	12	3.A.12.D
NV00993	2023-09-06 21:00:00	Bronchial Washing	F15	PID00800	SRR27645430	SAMN39504698	Clade1	2	1.A.2.F	0.5	0.5	0.5	>256	0.5	0.5	0.5	0.25	1		ERG11: Lys143Arg		B9J08_000401: Gln142*
NV00994	2023-08-23 21:00:00	Axilla/Groin	F39	PID00800	SRR27130923	SAMN38336630	Clade3	4	3.A.4.D
NV00995	2023-09-13 21:00:00	Blood	F39	PID00800	SRR27135740	SAMN38336256	Clade1	2	1.A.2.F											ERG11: Lys143Arg		B9J08_000401: Gln142*
NV00996	2024-01-07 21:00:00	Axilla/Groin	F39	PID00801	SRR29364625	SAMN41409132	Clade3	11	3.A.11.A
NV00997	2024-01-12 21:00:00	Skin Swab	F39	PID00801	SRR29365116	SAMN41409167	Clade1	2	1.B.2.A	0.12	1		>256	1	1	0.5	0.25	4		ERG11: Tyr132Phe
NV00998	2024-02-13 21:00:00	Urine	F39	PID00801	SRR29280475	SAMN41409400	Clade3	9	3.A.9.C
NV00999	2023-04-28 21:00:00	Blood	F38	PID00802	SRR27636290	SAMN35640930	Clade3	11	3.A.11.E	0.25	0.12	0.06	>256	0.25	0.5	0.25	0.12	1
NV01000	2023-06-04 21:00:00	Skin Swab	F36	PID00804	SRR27135936	SAMN38336534	Clade3	4	3.A.4.D	1	0.25	0.06	128	0.12	0.25	0.12	0.06	1
NV01001	2024-01-04 21:00:00	Axilla/Groin	F36	PID00805	SRR29364642	SAMN41409123	Clade1	5	1.B.5.A											ERG11: Tyr132Phe
NV01002	2024-08-04 21:00:00	Axilla/Groin	F36	PID00808	SRR33391990	SAMN48270109	Clade3	6	3.A.6.B
NV01003	2024-05-22 21:00:00	Axilla/Groin	F36	PID00809	SRR30946230	SAMN44245300	Clade3	13	3.A.13.L
NV01004	2023-08-22 21:00:00	Axilla/Groin	F28	PID00811	SRR27135853	SAMN38336488	Clade1	3	1.A.3.C											ERG11: Lys143Arg		B9J08_000401: Gln142*
NV01005	2024-07-23 21:00:00	Axilla/Groin	F36	PID00813	SRR33388494	SAMN48264969	Clade3	4	3.A.4.D
NV01006	2024-01-15 21:00:00	Axilla/Groin	F10	PID00817	SRR29365122	SAMN41409189	Clade1	7	1.A.7.A											ERG11: Lys143Arg		B9J08_000401: Gln142*
NV01007	2024-01-20 21:00:00	Axilla/Groin	F10	PID00817	SRR29365090	SAMN41409229	Clade1	7	1.A.7.A											ERG11: Lys143Arg		B9J08_000401: Gln142*
NV01008	2024-02-05 21:00:00	Urine	F39	PID00817	SRR29280572	SAMN41409343	Clade1	9	1.A.9.A											ERG11: Lys143Arg		B9J08_000401: Gln142*
NV01009	2024-07-02 21:00:00	Axilla/Groin	F10	PID00818	SRR33381054	SAMN48209786	Clade1	9	1.A.9.A											ERG11: Lys143Arg		B9J08_000401: Gln142*
NV01010	2023-06-15 21:00:00	Axilla/Groin	F39	PID00819	SRR27135806	SAMN38336284	Clade3	5	3.A.5.E
NV01011	2024-06-25 21:00:00	Axilla/Groin	F29	PID00820	SRR33381114	SAMN48209774	Clade1	2	1.A.2.H											ERG11: Lys143Arg		B9J08_000401: Gln142*
NV01012	2023-11-21 21:00:00	Axilla/Groin	F29	PID00821	SRR27718904	SAMN39600274	Clade1	2	1.B.2.A											ERG11: Tyr132Phe
NV01013	2024-08-26 21:00:00	Wound	F36	PID00822	SRR33392002	SAMN48270002	Clade1	1	1.B.1.A	0.5	0.25		32	0.03	0.12	0.12	0.06	0.25		ERG11: Tyr132Phe
NV01014	2024-04-21 21:00:00	Axilla/Groin	F02	PID00823	SRR30868010	SAMN43829811	Clade3	13	3.A.13.D												FUR1: Val103Gly
NV01015	2023-11-10 21:00:00	Axilla/Groin	F39	PID00824	SRR27645227	SAMN39504627	Clade1	3	1.A.3.E											ERG11: Lys143Arg		B9J08_000401: Gln142*
NV01016	2023-05-04 21:00:00	Axilla/Groin	F02	PID00825	SRR27636277	SAMN35640895	Clade3	6	3.A.6.G
NV01017	2024-01-13 21:00:00	Trachea	F36	PID00826	SRR29365111	SAMN41409171	Clade1	13	1.A.13.F	0.5	0.5		>256	0.25	0.5	0.25	0.12	4		ERG11: Lys143Arg	FUR1: Glu64*	B9J08_000401: Gln142*
NV01018	2022-10-06 21:00:00	Abscess	F36	PID00828	SRR23108905	SAMN32670043	Clade3	6	3.A.6.E	0.5	0.25	0.25	128	0.12	0.25	0.25	0.25	2
NV01019	2024-03-05 21:00:00	Axilla/Groin	F36	PID00829	SRR29278643	SAMN41409516	Clade3	13	3.A.13.H
NV01020	2022-10-04 21:00:00	Skin Swab	F40	PID00831	SRR23108815	SAMN32670081	Clade1	5	1.A.5.A											ERG11: Lys143Arg		B9J08_000401: Gln142*
NV01021	2022-05-31 21:00:00	Skin	F31	PID00831	SRR20081643	SAMN29634996	Clade1	5	1.A.5.A	0.5	0.25	0.5	128	0.5	0.5	0.25	0.25	1		ERG11: Lys143Arg		B9J08_000401: Gln142*
NV01022	2022-08-13 21:00:00	Urine	F41	PID00831	SRR23109108	SAMN32670314	Clade1	5	1.A.5.A	0.5	0.25	0.12	256	0.25	0.25		0.12	1		ERG11: Lys143Arg		B9J08_000401: Gln142*
NV01023	2021-12-02	Axilla/Groin	F40	PID00831	SRR19738690	SAMN29101403	Clade1	5	1.A.5.C											ERG11: Lys143Arg		B9J08_000401: Gln142*
NV01024	2023-02-19 21:00:00	Trachea	F36	PID00833	SRR27636500	SAMN35641122	Clade3	3	3.A.3.F	0.5	0.5	0.25	256	0.12	0.25	0.25	0.12	2
NV01025	2024-08-05 21:00:00	Urine	F38	PID00834	SRR33392018	SAMN48270048	Clade3	12	3.A.12.F	0.5	0.25		>256	0.12	0.12	0.12	0.03	2
NV01026	2024-08-04 21:00:00	Axilla/Groin	F28	PID00834	SRR33391948	SAMN48270067	Clade1	2	1.B.2.A											ERG11: Tyr132Phe
NV01027	2024-05-27 21:00:00	Axilla/Groin	F36	PID00835	SRR30946409	SAMN44245438	Clade3	13	3.A.13.G
NV01028	2024-05-27 21:00:00	Axilla/Groin	F36	PID00835	SRR30946408	SAMN44245437	Clade1	12	1.A.12.A											ERG11: Lys143Arg	FUR1: Arg101Leu	B9J08_000401: Gln142*
NV01029	2024-05-26 21:00:00	Urine	F36	PID00835	SRR30946468	SAMN44245620	Clade1	12	1.A.12.A										FKS1: Ser639Phe	ERG11: Lys143Arg	FUR1: Arg101Leu	B9J08_000401: Gln142*
NV01030	2024-05-26 21:00:00	Urine	F36	PID00835	SRR30947166	SAMN44246258	Clade3	10	3.A.10.A	0.5	0.12		>256	0.5	0.5	0.12	0.25	0.5
NV01031	2024-06-29 21:00:00	Axilla/Groin	F36	PID00835	SRR33381080	SAMN48209812	Clade3	13	3.A.13.G
NV01032	2024-06-29 21:00:00	Axilla/Groin	F36	PID00835	SRR33381081	SAMN48209813	Clade1	12	1.A.12.A											ERG11: Lys143Arg	FUR1: Arg101Leu	B9J08_000401: Gln142*
NV01033	2024-06-25 21:00:00	Axilla/Groin	F36	PID00835	SRR33381074	SAMN48209806	Clade3	13	3.A.13.G
NV01034	2024-06-25 21:00:00	Axilla/Groin	F36	PID00835	SRR33381075	SAMN48209807	Clade1	12	1.A.12.A											ERG11: Lys143Arg	FUR1: Arg101Leu	B9J08_000401: Gln142*
NV01035	2024-07-23 21:00:00	Axilla/Groin	F13	PID00835	SRR30947146	SAMN44246240	Clade3	13	3.A.13.G
NV01036	2024-07-23 21:00:00	Axilla/Groin	F13	PID00835	SRR30947145	SAMN44246239	Clade1	12	1.A.12.A											ERG11: Lys143Arg	FUR1: Arg101Leu	B9J08_000401: Gln142*
NV01037	2022-11-22 21:00:00	Blood	F38	PID00836	SRR23137812	SAMN32797917	Clade1	4	1.A.4.B	0.25	1	1	>256	1	1	0.5	0.5	2		ERG11: Lys143Arg	FUR1: Glu115*	B9J08_000401: Gln142*
NV01039	2023-09-06 21:00:00	Axilla/Groin	F12	PID00838	SRR27645503	SAMN39504728	Clade3	13	3.A.13.A
NV01040	2024-03-06 21:00:00	Axilla/Groin	F36	PID00839	SRR30847459	SAMN43830184	Clade3	12	3.A.12.H
NV01041	2024-01-23 21:00:00	Axilla/Groin	F23	PID00840	SRR29364009	SAMN41409259	Clade1	11	1.A.11.C											ERG11: Lys143Arg		B9J08_000401: Gln142*
NV01042	2023-09-08 21:00:00	Axilla/Groin	F39	PID00840	SRR27645495	SAMN39504746	Clade1	3	1.B.3.A											ERG11: Tyr132Phe
NV01043	2023-08-29 21:00:00	Axilla/Groin	F28	PID00841	SRR27130913	SAMN38336643	Clade3	11	3.A.11.J
NV01044	2023-08-30 21:00:00	Axilla/Groin	F28	PID00841	SRR27135620	SAMN38336382	Clade3	11	3.A.11.J
NV01045	2023-11-21 21:00:00	Axilla/Groin	F33	PID00842	SRR27645312	SAMN39504636	Clade1	12	1.A.12.C											ERG11: Lys143Arg	FUR1: Arg101Leu	B9J08_000401: Gln142*
NV01046	2023-07-27 21:00:00	Axilla/Groin	F29	PID00843	SRR27130883	SAMN38336746	Clade3	4	3.A.4.F
NV01047	2023-11-16 21:00:00	Skin Swab	F39	PID00845	SRR27607895	SAMN39273745	Clade3	1	3.A.1.D	0.5	0.25		256	0.12	0.25	0.12	0.12	0.5
NV01048	2024-01-20 21:00:00	Urine	F38	PID00845	SRR30868026	SAMN43829753	Clade3	1	3.A.1.D
NV01049	2023-08-21 21:00:00	Axilla/Groin	F39	PID00846	SRR27135858	SAMN38336500	Clade1	3	1.B.3.A											ERG11: Tyr132Phe
NV01050	2022-02-12	Urine	F39	PID03418	SRR19738652	SAMN29101368	Clade1	4	1.A.4.B	0.25	0.25	0.12	256	0.5	1	0.12	0.5	1		ERG11: Lys143Arg		B9J08_000401: Gln142*
NV01051	2022-08-23 21:00:00	Axilla/Groin	F12	PID03422	SRR23109073	SAMN32670279	Clade3	1	3.A.1.D
NV01052	2024-03-01 21:00:00	Axilla/Groin	F33	PID00851	SRR29278658	SAMN41409500	Clade3	8	3.A.8.C
NV01053	2023-04-04 21:00:00	Axilla/Groin	F36	PID00852	SRR27636257	SAMN35640858	Clade3	8	3.A.8.D
NV01054	2024-01-31 21:00:00	Axilla/Groin	F12	PID00853	SRR30846281	SAMN43830234	Clade1	11	1.A.11.C											ERG11: Lys143Arg		B9J08_000401: Gln142*
NV01055	2024-01-24 21:00:00	Axilla/Groin	F36	PID00853	SRR29363998	SAMN41409270	Clade1	11	1.A.11.C											ERG11: Lys143Arg		B9J08_000401: Gln142*
NV01056	2024-04-29 21:00:00	Axilla/Groin	F39	PID00855	SRR30866599	SAMN43829869	Clade3	11	3.A.11.A
NV01057	2023-05-17 21:00:00	Axilla/Groin	F12	PID00854	SRR27135824	SAMN38336306	Clade3	11	3.A.11.A
NV01058	2024-01-27 21:00:00	Axilla/Groin	F39	PID00855	SRR29363992	SAMN41409287	Clade3	11	3.A.11.A
NV01059	2021-12-22	Blood	F36	PID03401	SRR19738679	SAMN29101393	Clade3	5	3.A.5.E	0.5	0.25	0.5	32	0.06	0.12		0.12	1
NV01060	2024-02-08 21:00:00	Axilla/Groin	F29	PID00856	SRR29280480	SAMN41409367	Clade3	2	3.A.2.D
NV01061	2024-02-12 21:00:00	Axilla/Groin	F13	PID00857	SRR29280555	SAMN41409398	Clade3	10	3.A.10.C
NV01062	2024-02-01 21:00:00	Axilla/Groin	F36	PID00857	SRR29280624	SAMN41409325	Clade1	3	1.B.3.A											ERG11: Tyr132Phe
NV01063	2023-12-25 21:00:00	Axilla/Groin	F36	PID00858	SRR28069432	SAMN40079062	Clade3	5	3.A.5.E
NV01064	2024-01-14 21:00:00	Axilla/Groin	F36	PID00858	SRR29365132	SAMN41409176	Clade3	5	3.A.5.E
NV01065	2024-02-18 21:00:00	Axilla/Groin	F36	PID00858	SRR30844619	SAMN43817324	Clade3	5	3.A.5.E
NV01066	2024-07-30 21:00:00	Axilla/Groin	F39	PID00859	SRR33392049	SAMN48270136	Clade3	11	3.A.11.H
NV01067	2024-06-23 21:00:00	Axilla/Groin	F36	PID00861	SRR33370034	SAMN48199608	Clade3	5	3.A.5.C
NV01068	2024-06-25 21:00:00	Wound	F36	PID00861	SRR33381036	SAMN48209740	Clade3	5	3.A.5.C	0.5	2		>256	0.25	0.5	0.5	0.25	2
NV01069	2023-02-17 21:00:00	Wound	F36	PID00860	SRR27636501	SAMN35641123	Clade3	8	3.A.8.D	1	1	0.5	256	0.12	0.5	0.25	0.25	4
NV01070	2024-06-19 21:00:00	Axilla/Groin	F36	PID00862	SRR33370049	SAMN48199623	Clade1	1	1.B.1.A											ERG11: Tyr132Phe
NV01071	2024-06-25 21:00:00	Axilla/Groin	F36	PID00862	SRR33369974	SAMN48199561	Clade1	1	1.B.1.A											ERG11: Tyr132Phe
NV01072	2024-06-24 21:00:00	Abscess	F36	PID00862	SRR33381064	SAMN48209796	Clade1	1	1.B.1.A	1	0.25		128	0.06	0.25	0.12	0.06	0.5		ERG11: Tyr132Phe
NV01073	2024-07-30 21:00:00	Wound	F36	PID00862	SRR33391963	SAMN48270082	Clade1	1	1.B.1.A	2	0.5		128	0.06	0.25	0.25	0.25	0.25		ERG11: Tyr132Phe
NV01074	2023-06-20 21:00:00	Axilla/Groin	F12	PID00863	SRR27130966	SAMN38336716	Clade3	10	3.A.10.E
NV01075	2023-03-05 21:00:00	Axilla/Groin	F29	PID00864	SRR27636393	SAMN35641079	Clade3	11	3.A.11.F
NV01076	2023-03-09 21:00:00	Axilla/Groin	F39	PID00864	SRR27636492	SAMN35641049	Clade3	11	3.A.11.F
NV01077	2023-07-06 21:00:00	Axilla/Groin	F36	PID00865	SRR27130933	SAMN38336620	Clade1	2	1.A.2.H											ERG11: Lys143Arg		B9J08_000401: Gln142*
NV01078	2024-03-22 21:00:00	Axilla/Groin	F30	PID00867	SRR30847431	SAMN43830156	Clade3	11	3.A.11.D
NV01079	2022-10-11 21:00:00	Not Indicated	F12	PID00869	SRR23108907	SAMN32670045	Clade3	4	3.A.4.C
NV01080	2022-09-20 21:00:00	Skin Swab	F40	PID00870	SRR23109159	SAMN32670151	Clade1	2	1.A.2.H											ERG11: Lys143Arg
NV01081	2022-06-21 21:00:00	Wound	F31	PID00870	SRR23109142	SAMN32670380	Clade1	5	1.A.5.C	0.5	1	0.5	256	0.5	0.5	0.5	0.25	2		ERG11: Lys143Arg		B9J08_000401: Gln142*
NV01082	2023-02-12 21:00:00	Axilla/Groin	F34	PID00870	SRR27636524	SAMN35641145	Clade1	4	1.A.4.B											ERG11: Lys143Arg		B9J08_000401: Gln142*
NV01083	2022-07-31 21:00:00	Blood	F36	PID00870	SRR23109115	SAMN32670353	Clade1	2	1.A.2.H	0.25	0.5	0.25	256	0.25	0.12	0.25	0.12	0.5		ERG11: Lys143Arg		B9J08_000401: Gln142*
NV01084	2022-08-03 21:00:00	Wound	F36	PID00870	SRR23109228	SAMN32670348	Clade1	2	1.A.2.H	0.5	0.25	0.25	>256	0.25	0.5	0.25	0.25	1		ERG11: Lys143Arg
NV01085	2022-07-20 21:00:00	Blood	F39	PID00870	SRR23958528	SAMN30468102	Clade1	5	1.A.5.A	0.5	0.5	0.25	256	0.25	0.25	0.25	0.12	2		ERG11: Lys143Arg		B9J08_000401: Gln142*
NV01086	2023-04-08 21:00:00	Axilla/Groin	F39	PID00870	SRR27636243	SAMN35640914	Clade1	2	1.A.2.H											ERG11: Lys143Arg
NV01087	2022-07-06	Urine	F17	PID00870	SRR23958556	SAMN30468130	Clade1	8	1.A.8.A	0.25	1	0.5	>256	0.5	0.5	0.5	0.25	2		ERG11: Lys143Arg		B9J08_000401: Gln142*
NV01088	2022-07-06	Urine	F17	PID00870	SRR23958539	SAMN30468113	Clade1	2	1.A.2.H											ERG11: Lys143Arg		B9J08_000401: Gln142*
NV01089	2023-01-27 21:00:00	Wound	F36	PID00871	SRR23920671	SAMN33829923	Clade3	5	3.A.5.E	0.5	1	1	256	0.12	0.25	0.5	0.25	4
NV01090	2023-11-09 21:00:00	Axilla/Groin	F23	PID00872	SRR27645218	SAMN39504680	Clade1	3	1.A.3.E											ERG11: Lys143Arg		B9J08_000401: Gln142*
NV01091	2023-12-25 21:00:00	Axilla/Groin	F10	PID00873	SRR28069435	SAMN40079065	Clade1	12	1.A.12.C											ERG11: Lys143Arg	FUR1: Arg101Leu	B9J08_000401: Gln142*
NV01092	2023-08-21 21:00:00	Urine	F39	PID00875	SRR27135636	SAMN38336582	Clade1	13	1.A.13.A											ERG11: Lys143Arg		B9J08_000401: Gln142*
NV01093	2023-10-31 21:00:00	Axilla/Groin	F36	PID00876	SRR27607829	SAMN39273796	Clade3	5	3.A.5.E
NV01094	2022-10-23 21:00:00	Blood	F41	PID00876	SRR23108760	SAMN32670007	Clade3	2	3.A.2.D	0.25	0.12	0.06	128	0.06	0.12		0.12	2
NV01095	2022-11-06 21:00:00	Urine	F41	PID00876	SRR23137842	SAMN32797947	Clade3	2	3.A.2.D
NV01096	2023-03-31 21:00:00	Trachea	F39	PID00877	SRR27636262	SAMN35640859	Clade3	4	3.A.4.D
NV01097	2023-04-05 21:00:00	Blood	F39	PID00877	SRR27636246	SAMN35640853	Clade3	4	3.A.4.D	1	0.25	0.12	256	0.12	0.25	0.25	12	2
NV01098	2023-04-05 21:00:00	Wound	F39	PID00877	SRR27636245	SAMN35640981	Clade3	4	3.A.4.D	1	0.25	0.12	256	0.12	0.25	0.12	0.12	1
NV01099	2024-03-20 21:00:00	Axilla/Groin	F36	PID00878	SRR30846257	SAMN43830210	Clade3	3	3.A.3.C
NV01100	2024-01-28 21:00:00	Pleural Fluid	F38	PID00881	SRR29363943	SAMN41409297	Clade1	3	1.A.3.C	0.5	1		>256	0.25	0.5	0.25	0.25	2		ERG11: Lys143Arg		B9J08_000401: Gln142*
NV01101	2022-12-15 21:00:00	Skin Swab	F36	PID00882	SRR23249013	SAMN32934642	Clade3	13	3.A.13.D	0.5	0.25	0.25	128	0.25	0.25	0.12	0.12	2			FUR1: Val103Gly
NV01102	2023-01-12 21:00:00	Axilla/Groin	F33	PID00884	SRR23920709	SAMN33829961	Clade1	11	1.A.11.A											ERG11: Lys143Arg		B9J08_000401: Gln142*
NV01103	2024-05-07 21:00:00	Wound	F36	PID00885	SRR30946268	SAMN44245369	Clade1	3	1.B.3.A	1	0.12		64	0.03	0.12	0.12	0.06	0.25		ERG11: Tyr132Phe
NV01104	2024-07-17 21:00:00	Axilla/Groin	F35	PID00887	SRR33388502	SAMN48265006	Clade3	4	3.A.4.F
NV01105	2024-01-30 21:00:00	Axilla/Groin	F36	PID00888	SRR30844165	SAMN43817413	Clade3	13	3.A.13.M
NV01106	2024-01-30 21:00:00	Bronchial Lavage	F36	PID00888	SRR29363944	SAMN41409312	Clade3	13	3.A.13.M
NV01107	2024-01-29 21:00:00	Blood	F36	PID00888	SRR29363979	SAMN41409303	Clade3	13	3.A.13.M
NV01108	2024-01-30 21:00:00	Fluid	F36	PID00888	SRR29363975	SAMN41409311	Clade3	13	3.A.13.M
NV01109	2024-07-16 21:00:00	Axilla/Groin	F36	PID00890	SRR33388522	SAMN48265026	Clade3	12	3.A.12.E
NV01110	2024-05-06 21:00:00	Axilla/Groin	F12	PID00892	SRR30867976	SAMN43829777	Clade3	13	3.A.13.G
NV01111	2024-05-06 21:00:00	Axilla/Groin	F12	PID00892	SRR30867975	SAMN43829776	Clade1	2	1.A.2.H											ERG11: Lys143Arg		B9J08_000401: Gln142*
NV01112	2024-05-12 21:00:00	Axilla/Groin	F36	PID00892	SRR30945894	SAMN44244890	Clade3	13	3.A.13.G
NV01113	2024-05-12 21:00:00	Axilla/Groin	F36	PID00892	SRR30945893	SAMN44244889	Clade1	2	1.A.2.H											ERG11: Lys143Arg		B9J08_000401: Gln142*
NV01114	2024-06-09 21:00:00	Axilla/Groin	F39	PID00892	SRR30946938	SAMN44246123	Clade3	13	3.A.13.G
NV01115	2024-06-09 21:00:00	Axilla/Groin	F39	PID00892	SRR30946937	SAMN44246122	Clade1	2	1.A.2.H											ERG11: Lys143Arg		B9J08_000401: Gln142*
NV01116	2024-06-11 21:00:00	Axilla/Groin	F39	PID00892	SRR33345024	SAMN48181662	Clade1	2	1.A.2.H											ERG11: Lys143Arg		B9J08_000401: Gln142*
NV01117	2024-06-13 21:00:00	Urine	F39	PID00892	SRR33370017	SAMN48199591	Clade1	2	1.A.2.H	0.25	2		>256	1	1	1	0.5	2		ERG11: Lys143Arg		B9J08_000401: Gln142*
NV01118	2024-10-11	Wound	F36	PID00892	SRR33403236	SAMN48286596	Clade1	2	1.A.2.H	0.25	2		>256	1	1	0.5	0.5	4		ERG11: Lys143Arg		B9J08_000401: Gln142*
NV01119	2024-10-19	Urine	F36	PID00892	SRR33403313	SAMN48286585	Clade1	2	1.A.2.H	0.5	1		256	0.5	0.5	0.25	0.25	1		ERG11: Lys143Arg	FUR1: Gly207Asp	B9J08_000401: Gln142*
NV01120	2024-04-07 21:00:00	Axilla/Groin	F33	PID00893	SRR30847306	SAMN43830048	Clade3	13	3.A.13.G
NV01121	2022-11-09 21:00:00	Blood	F38	PID00894	SRR23137838	SAMN32797943	Clade3	4	3.A.4.C	0.5	1	0.5	>256	0.25	0.5	1	0.25	4
NV01122	2022-08-28 21:00:00	Axilla/Groin	F17	PID00894	SRR23109059	SAMN32670265	Clade3	2	3.A.2.D
NV01123	2022-04-18 21:00:00	Axilla/Groin	F39	PID03353	SRR23958515	SAMN30468089	Clade3	5	3.A.5.F
NV01124	2023-04-22 21:00:00	Blood	F36	PID03505	SRR27636300	SAMN35640939	Clade1	2	1.A.2.I										FKS1: Leu640Val	ERG11: Lys143Arg		B9J08_000401: Gln142*
NV01125	2023-04-22 21:00:00	Urine	F36	PID03505	SRR27636299	SAMN35640851	Clade3	3	3.A.3.A
NV01126	2023-05-03 21:00:00	Wound	F36	PID03505	SRR27131021	SAMN38336741	Clade3	3	3.A.3.A	1	0.25	0.12	>256	0.06	0.5		0.12	2
NV01127	2023-03-30 21:00:00	Axilla/Groin	F14	PID03505	SRR27636270	SAMN35640991	Clade3	12	3.A.12.D
NV01128	2023-02-10 21:00:00	Bone	F38	PID03506	SRR23920647	SAMN33829902	Clade3	5	3.A.5.F	0.5	0.5	0.25	256	0.25	0.5	0.5	0.25	2
NV01129	2023-05-23 21:00:00	Axilla/Groin	F33	PID00896	SRR27131006	SAMN38336670	Clade1	4	1.A.4.B											ERG11: Lys143Arg		B9J08_000401: Gln142*
NV01130	2022-04-18 21:00:00	Axilla/Groin	F39	PID03355	SRR23958514	SAMN30468088	Clade1	5	1.A.5.C											ERG11: Lys143Arg		B9J08_000401: Gln142*
NV01131	2023-12-08 21:00:00	Wound	F38	PID00897	SRR27718937	SAMN39600243	Clade3	8	3.A.8.C	1	0.5		>256	0.12	0.25	0.5	0.12	0.5
NV01132	2023-04-09 21:00:00	Axilla/Groin	F14	PID00898	SRR27636250	SAMN35640940	Clade3	3	3.A.3.A
NV01133	2024-07-29 21:00:00	Axilla/Groin	F12	PID00899	SRR33388538	SAMN48264923	Clade1	11	1.A.11.C											ERG11: Lys143Arg		B9J08_000401: Gln142*
NV01134	2024-07-14 21:00:00	Axilla/Groin	F39	PID00899	SRR33388598	SAMN48265041	Clade1	11	1.A.11.C											ERG11: Lys143Arg		B9J08_000401: Gln142*
NV01135	2023-11-21 21:00:00	Axilla/Groin	F36	PID00900	SRR27718899	SAMN39600290	Clade1	12	1.A.12.C											ERG11: Lys143Arg	FUR1: Arg101Leu	B9J08_000401: Gln142*
NV01136	2024-04-30 21:00:00	Abscess	F36	PID00900	SRR30945926	SAMN44244927	Clade3	5	3.A.5.E	0.5	0.25		>256	0.12	0.5	0.12	0.12	1
NV01137	2024-02-28 21:00:00	Axilla/Groin	F14	PID00901	SRR29280511	SAMN41409486	Clade3	4	3.A.4.O
NV01138	2023-09-19 21:00:00	Axilla/Groin	F36	PID00902	SRR27645451	SAMN39504722	Clade3	12	3.A.12.C
NV01139	2024-01-22 21:00:00	Wound	F36	PID00903	SRR29363988	SAMN41409252	Clade1	3	1.A.3.E											ERG11: Lys143Arg		B9J08_000401: Gln142*
NV01140	2022-08-17 21:00:00	Axilla/Groin	F33	PID00904	SRR23920743	SAMN33829963	Clade3	6	3.A.6.C
NV01141	2023-06-26 21:00:00	Axilla/Groin	F28	PID00905	SRR27130945	SAMN38336714	Clade1	13	1.A.13.A											ERG11: Lys143Arg
NV01142	2024-03-07 21:00:00	Axilla/Groin	F36	PID00905	SRR30846349	SAMN43817259	Clade1	13	1.A.13.A											ERG11: Lys143Arg		B9J08_000401: Gln142*
NV01143	2023-10-01 21:00:00	Blood	F25	PID00906	SRR27645276	SAMN39504862	Clade1	13	1.A.13.A	0.5	0.5	0.5	>256	0.5	1	0.25	0.5	1		ERG11: Lys143Arg		B9J08_000401: Gln142*
NV01144	2023-08-24 21:00:00	Axilla/Groin	F02	PID00908	SRR27130919	SAMN38336715	Clade1	1	1.B.1.A											ERG11: Tyr132Phe
NV01145	2023-09-26 21:00:00	Axilla/Groin	F29	PID00910	SRR27607988	SAMN39273902	Clade1	13	1.A.13.A											ERG11: Lys143Arg		B9J08_000401: Gln142*
NV01146	2023-12-17 21:00:00	Axilla/Groin	F36	PID00909	SRR28069411	SAMN40079102	Clade3	7	3.A.7.C
NV01147	2022-10-05 21:00:00	Urine	F41	PID00911	SRR23108919	SAMN32670057	Clade3	4	3.A.4.F	0.5	0.25	0.12	128	0.12	0.25	0.25	0.12	2
NV01148	2022-06-15 21:00:00	Axilla/Groin	F29	PID00911	SRR23958466	SAMN30468040	Clade3	4	3.A.4.F
NV01149	2023-12-12 21:00:00	Urine	F39	PID00912	SRR27718926	SAMN39600286	Clade1	12	1.A.12.C	0.5	0.5		>256	0.5	1	0.25	0.5	1		ERG11: Lys143Arg	FUR1: Arg101Leu	B9J08_000401: Gln142*
NV01150	2023-10-22 21:00:00	Axilla/Groin	F33	PID00914	SRR27607875	SAMN39273842	Clade3	4	3.A.4.H
NV01151	2023-10-21 21:00:00	Axilla/Groin	F33	PID00914	SRR27607873	SAMN39273840	Clade3	4	3.A.4.H
NV01152	2023-06-06 21:00:00	Eye	F39	PID00915	SRR27135932	SAMN38336349	Clade3	13	3.A.13.E	0.5	0.5	0.12	256	0.25	0.5	0.25	0.12	4
NV01153	2023-10-19 21:00:00	Axilla/Groin	F36	PID00917	SRR27607907	SAMN39273853	Clade3	12	3.A.12.D
NV01154	2023-10-19 21:00:00	Wound	F36	PID00917	SRR27645396	SAMN39504819	Clade1	3	1.A.3.A	0.5	0.5		256	1	1	0.5	0.5	2		ERG11: Lys143Arg		B9J08_000401: Gln142*
NV01155	2023-11-27 21:00:00	Axilla/Groin	F36	PID00917	SRR27645294	SAMN39504617	Clade1	3	1.A.3.A											ERG11: Lys143Arg		B9J08_000401: Gln142*
NV01156	2023-11-26 21:00:00	Skin Swab	F36	PID00917	SRR29364628	SAMN41408948	Clade1	2	1.B.2.A	0.5	1		>256	4	1	0.25	0.5	8		ERG11: Tyr132Phe
NV01157	2024-05-04 21:00:00	Axilla/Groin	F28	PID00918	SRR30945877	SAMN44244873	Clade1	8	1.A.8.A											ERG11: Lys143Arg		B9J08_000401: Gln142*
NV01158	2023-08-27 21:00:00	Axilla/Groin	F12	PID00919	SRR27135624	SAMN38336571	Clade3	12	3.A.12.E
NV01159	2024-02-05 21:00:00	Axilla/Groin	F36	PID00921	SRR29280614	SAMN41409347	Clade3	5	3.A.5.D
NV01160	2024-12-01	Blood	F36	PID00921	SRR33405936	SAMN48288185	Clade3	11	3.A.11.E	1	2		>256	>8	>16	1	>16	>16
NV01161	2023-09-17 21:00:00	Axilla/Groin	F36	PID00920	SRR27645465	SAMN39504747	Clade3	12	3.A.12.G
NV01162	2023-05-06 21:00:00	Wound	F36	PID00922	SRR27636235	SAMN35640923	Clade3	13	3.A.13.K	0.5	0.12	0.06	256	0.12	0.5		0.12	2
NV01163	2024-08-09 21:00:00	Urine	F39	PID00924	SRR33392024	SAMN48270054	Clade3	8	3.A.8.A	0.5	0.5		>256	0.12	0.25	0.25	0.12	2
NV01164	2024-07-03 21:00:00	Axilla/Groin	F36	PID00923	SRR33381053	SAMN48209785	Clade3	4	3.A.4.O
NV01165	2024-07-15 21:00:00	Axilla/Groin	F36	PID00923	SRR33388586	SAMN48265029	Clade3	4	3.A.4.O
NV01166	2024-07-15 21:00:00	Wound	F36	PID00923	SRR33388512	SAMN48265016	Clade3	4	3.A.4.O	0.5	0.5		>256	0.25	0.5	0.12	0.12	2
NV01167	2021-11-24	Blood	F36	PID03419	SRR19738692	SAMN29101405	Clade3	5	3.A.5.E
NV01168	2024-02-02 21:00:00	Axilla/Groin	F36	PID00925	SRR30844156	SAMN43817404	Clade3	13	3.A.13.B
NV01169	2023-02-11 21:00:00	Axilla/Groin	F39	PID00926	SRR27636527	SAMN35641148	Clade1	2	1.A.2.I											ERG11: Lys143Arg		B9J08_000401: Gln142*
NV01170	2024-07-16 21:00:00	Axilla/Groin	F36	PID00928	SRR33388518	SAMN48265022	Clade3	3	3.A.3.J
NV01171	2024-07-17 21:00:00	Axilla/Groin	F36	PID00929	SRR33388519	SAMN48265023	Clade3	13	3.A.13.G
NV01172	2024-01-14 21:00:00	Axilla/Groin	F36	PID00930	SRR29365124	SAMN41409183	Clade1	12	1.A.12.A											ERG11: Lys143Arg		B9J08_000401: Gln142*
NV01173	2024-01-17 21:00:00	Axilla/Groin	F36	PID00930	SRR29365104	SAMN41409217	Clade3	11	3.A.11.A
NV01174	2022-06-07 21:00:00	Skin	F40	PID00933	SRR23958548	SAMN30468122	Clade3	3	3.A.3.L
NV01175	2022-06-09 21:00:00	Axilla/Groin	F36	PID00933	SRR20081618	SAMN29634971	Clade3	3	3.A.3.L
NV01176	2023-05-23 21:00:00	Skin Swab	F25	PID00934	SRR27135709	SAMN38336297	Clade3	5	3.A.5.E	0.5	0.5	0.25	256	0.25	0.5	0.5	0.12	2
NV01177	2023-05-25 21:00:00	Axilla/Groin	F29	PID00935	SRR27135724	SAMN38336442	Clade3	13	3.A.13.A
NV01178	2023-06-14 21:00:00	Axilla/Groin	F33	PID00935	SRR27135815	SAMN38336476	Clade3	13	3.A.13.A
NV01179	2023-07-07 21:00:00	Not Indicated	F15	PID00937	SRR27135780	SAMN38336489	Clade3	1	3.B.1.A
NV01180	2022-09-26 21:00:00	Skin Swab	F40	PID00940	SRR23920643	SAMN33829864	Clade1	3	1.B.3.A											ERG11: Tyr132Phe
NV01181	2022-12-17 21:00:00	Wound	F36	PID00938	SRR23137743	SAMN32797850	Clade3	2	3.A.2.D	0.12	0.12	0.06	256	0.06	0.12	0.06	0.06	1
NV01182	2023-01-30 21:00:00	Catheter Tip	F15	PID00942	SRR23920707	SAMN33829970	Clade3	4	3.A.4.C
NV01183	2023-01-28 21:00:00	Blood	F36	PID00942	SRR23920670	SAMN33829922	Clade3	4	3.A.4.C	0.5	0.03	0.03	256	0.25	0.5	0.06	0.25	2
NV01184	2024-09-05 21:00:00	Urine	F39	PID00943	SRR33391922	SAMN48270012	Clade1	11	1.A.11.C	0.25	0.5		256	0.5	0.5	0.25	0.12	2		ERG11: Lys143Arg		B9J08_000401: Gln142*
NV01185	2022-09-14 21:00:00	Groin	F36	PID00944	SRR23108992	SAMN32670166	Clade3	1	3.A.1.B	1	0.12	0.12	256	0.12	0.12	0.12	0.12	2
NV01186	2023-02-21 21:00:00	Wound	F36	PID00944	SRR27636419	SAMN35641105	Clade3	1	3.A.1.B	0.5	0.25	0.12	256	0.12	0.25	0.12	0.12	2
NV01187	2024-07-24 21:00:00	Axilla/Groin	F36	PID00945	SRR33388551	SAMN48264936	Clade3	13	3.A.13.M
NV01188	2024-02-08 21:00:00	Axilla/Groin	F36	PID00947	SRR29280587	SAMN41409373	Clade3	13	3.A.13.D												FUR1: Val103Gly
NV01189	2024-02-08 21:00:00	Lung	F36	PID00947	SRR29280567	SAMN41409372	Clade1	1	1.B.1.A											ERG11: Tyr132Phe
NV01190	2024-02-18 21:00:00	Axilla/Groin	F36	PID00947	SRR30844605	SAMN43817310	Clade3	13	3.A.13.D												FUR1: Val103Gly
NV01191	2024-03-09 21:00:00	Axilla/Groin	F30	PID00948	SRR30844134	SAMN43817383	Clade3	9	3.A.9.C
NV01192	2022-08-24 21:00:00	Skin Swab	F40	PID00949	SRR23137780	SAMN32797887	Clade3	13	3.A.13.B
NV01193	2024-05-29 21:00:00	Axilla/Groin	F33	PID00951	SRR30946465	SAMN44245617	Clade1	2	1.A.2.H											ERG11: Lys143Arg		B9J08_000401: Gln142*
NV01194	2024-03-19 21:00:00	Axilla/Groin	F33	PID00951	SRR30846262	SAMN43830215	Clade3	1	3.A.1.A
NV01195	2022-12-13 21:00:00	Skin Swab	F40	PID00952	SRR23137758	SAMN32797865	Clade3	3	3.A.3.K
NV01196	2023-08-22 21:00:00	Axilla/Groin	F12	PID00953	SRR27135623	SAMN38336529	Clade3	3	3.A.3.G
NV01197	2024-01-30 21:00:00	Axilla/Groin	F12	PID00953	SRR29363958	SAMN41409315	Clade3	12	3.A.12.E
NV01198	2024-03-08 21:00:00	Axilla/Groin	F12	PID00953	SRR30846328	SAMN43817245	Clade3	3	3.A.3.G
NV01199	2023-03-07 21:00:00	Axilla/Groin	F36	PID00954	SRR27596512	SAMN38347986	Clade3	13	3.A.13.C												FUR1: Val103Gly
NV01200	2024-06-11 21:00:00	Axilla/Groin	F39	PID00955	SRR30946923	SAMN44246108	Clade1	9	1.A.9.A											ERG11: Lys143Arg		B9J08_000401: Gln142*
NV01201	2024-06-10 21:00:00	Urine	F39	PID00955	SRR33370018	SAMN48199592	Clade1	9	1.A.9.A	0.5	2		>256	1	1	0.5	0.5	2		ERG11: Lys143Arg		B9J08_000401: Gln142*
NV01202	2024-06-14 21:00:00	Blood	F39	PID00955	SRR30947162	SAMN44246254	Clade1	9	1.A.9.A	0.5	0.5		>256	0.5	0.25	0.12	0.5	2		ERG11: Lys143Arg		B9J08_000401: Gln142*
NV01203	2023-06-09 21:00:00	Axilla/Groin	F12	PID00956	SRR27135810	SAMN38336324	Clade3	5	3.A.5.G
NV01204	2022-04-20 21:00:00	Skin	F12	PID03376	SRR23109125	SAMN32670363	Clade3	4	3.A.4.F
NV01205	2022-12-05 21:00:00	Axilla/Groin	F39	PID00957	SRR23137784	SAMN32797891	Clade1	3	1.A.3.A											ERG11: Lys143Arg		B9J08_000401: Gln142*
NV01206	2021-11-27 21:00:00	Urine	F39	PID03341	SRR23958469	SAMN30468043	Clade3	4	3.A.4.B	0.5	0.5	0.25	128	0.12	0.25		0.06	2
NV01208	2023-09-19 21:00:00	Axilla/Groin	F36	PID00958	SRR27645449	SAMN39504733	Clade3	12	3.A.12.G
NV01209	2023-07-02 21:00:00	Axilla/Groin	F36	PID00959	SRR27135892	SAMN38336287	Clade3	3	3.A.3.K
NV01210	2023-11-02 21:00:00	Skin Swab	F36	PID00959	SRR27607957	SAMN39273775	Clade3	3	3.A.3.K	0.25	0.25		256	0.25	0.5	0.12	0.12	2
NV01211	2024-05-19 21:00:00	Axilla/Groin	F36	PID00959	SRR30946501	SAMN44245653	Clade3	3	3.A.3.K
NV01212	2023-11-23 21:00:00	Axilla/Groin	F33	PID00962	SRR27645302	SAMN39504618	Clade3	3	3.A.3.J
NV01213	2024-02-01 21:00:00	Axilla/Groin	F36	PID00962	SRR30844154	SAMN43817402	Clade3	3	3.A.3.B
NV01214	2024-02-01 21:00:00	Wound	F36	PID00962	SRR29280469	SAMN41409323	Clade3	3	3.A.3.J
NV01215	2024-02-01 21:00:00	Wound	F36	PID00962	SRR30844119	SAMN43817368	Clade3	3	3.A.3.J	1	0.25		256	0.12	0.25	0.5	0.12	1
NV01216	2024-03-21 21:00:00	Axilla/Groin	F36	PID00962	SRR30846247	SAMN43830200	Clade3	3	3.A.3.J
NV01217	2023-09-10 21:00:00	Wound	F39	PID00963	SRR27645479	SAMN39504784	Clade3	11	3.A.11.A
NV01218	2023-11-13 21:00:00	Axilla/Groin	F33	PID00963	SRR27645369	SAMN39504672	Clade3	11	3.A.11.A
NV01219	2024-07-31 21:00:00	Axilla/Groin	F13	PID00964	SRR33392050	SAMN48270137	Clade3	10	3.A.10.E
NV01220	2024-03-14 21:00:00	Axilla/Groin	F02	PID00965	SRR30846321	SAMN43817238	Clade1	10	1.A.10.B											ERG11: Lys143Arg		B9J08_000401: Gln142*
NV01221	2022-11-16 21:00:00	Axilla/Groin	F28	PID00966	SRR23137829	SAMN32797934	Clade3	13	3.A.13.B
NV01222	2023-09-22 21:00:00	Bone	F36	PID00966	SRR27645334	SAMN39504831	Clade3	5	3.A.5.E	0.5	0.25	0.25	256	0.12	0.5	0.12	0.12	1
NV01223	2023-11-01 21:00:00	Groin	F36	PID00966	SRR27607959	SAMN39273777	Clade1	13	1.A.13.C	0.5	1		>256	1	1	1	0.5	2	FKS1: Asp642Tyr	ERG11: Lys143Arg		B9J08_000401: Gln142*
NV01224	2024-01-23 21:00:00	Axilla/Groin	F36	PID00966	SRR29364011	SAMN41409255	Clade1	13	1.A.13.C										FKS1: Asp642Tyr	ERG11: Lys143Arg		B9J08_000401: Gln142*
NV01225	2023-11-24 21:00:00	Axilla/Groin	F36	PID00967	SRR27718890	SAMN39600236	Clade3	5	3.A.5.E
NV01226	2024-05-04 21:00:00	Urine	F39	PID00969	SRR30867958	SAMN43829759	Clade1	13	1.A.13.A	0.5	0.12		>256	0.5	0.5	0.12	0.5	1		ERG11: Lys143Arg		B9J08_000401: Gln142*
NV01227	2024-06-06 21:00:00	Blood	F36	PID00968	SRR33369997	SAMN48199584	Clade3	13	3.A.13.L	1	0.5		>256	0.12	0.25	0.25	0.12	2
NV01229	2024-05-01 21:00:00	Urine	F36	PID00970	SRR30945928	SAMN44244929	Clade1	1	1.B.1.A	2	1		64	0.03	0.12	0.25	0.06	0.25	FKS1: Arg1354His	ERG11: Tyr132Phe				B9J08_005340: Ala162Val
NV01230	2022-06-20 21:00:00	Urine	F31	PID00971	SRR23109143	SAMN32670381	Clade1	3	1.A.3.A	1	1	0.25	>256	1	0.5	0.5	0.25	2		ERG11: Lys143Arg	FUR1: Ala151Thr
NV01231	2022-02-05	Urine	F39	PID00971	SRR19738656	SAMN29101372	Clade1	3	1.A.3.A	0.25	1	0.25	256	0.5	0.5	0.25	0.06	1		ERG11: Lys143Arg		B9J08_000401: Gln142*
NV01232	2024-05-01 21:00:00	Axilla/Groin	F36	PID00972	SRR30866582	SAMN43829852	Clade3	13	3.A.13.D												FUR1: Val103Gly
NV01233	2022-11-21 21:00:00	Groin	F36	PID00974	SRR23137811	SAMN32797916	Clade3	6	3.A.6.E	0.5	1	0.25	256	0.25	0.5	0.5	0.25	4
NV01234	2023-05-20 21:00:00	Blood	F36	PID00974	SRR27135736	SAMN38336343	Clade3	6	3.A.6.E	0.5	1	1	256	0.25	0.5	0.5	0.25	4
NV01235	2023-11-28 21:00:00	Skin Swab	F36	PID00976	SRR27718866	SAMN39600303	Clade1	13	1.A.13.E	0.5	2		256	4	2	1	0.5	8		ERG11: Lys143Arg		B9J08_000401: Gln142*
NV01236	2023-12-20 21:00:00	Axilla/Groin	F36	PID00977	SRR28069402	SAMN40079093	Clade1	13	1.A.13.E											ERG11: Lys143Arg		B9J08_000401: Gln142*
NV01237	2024-01-25 21:00:00	Axilla/Groin	F36	PID00977	SRR29364000	SAMN41409275	Clade1	13	1.A.13.E											ERG11: Lys143Arg
NV01238	2024-01-28 21:00:00	Axilla/Groin	F36	PID00977	SRR29363990	SAMN41409295	Clade3	3	3.A.3.H
NV01239	2024-02-16 21:00:00	Axilla/Groin	F36	PID00977	SRR30844617	SAMN43817322	Clade1	13	1.A.13.E											ERG11: Lys143Arg		B9J08_000401: Gln142*
NV01240	2023-05-27 21:00:00	Skin Swab	F36	PID00975	SRR27135722	SAMN38336434	Clade3	6	3.A.6.E	1	0.25	0.06	256	0.06	0.12		0.06	1
NV01241	2024-02-17 21:00:00	Axilla/Groin	F12	PID00978	SRR30844603	SAMN43817308	Clade3	11	3.A.11.A
NV01242	2024-03-18 21:00:00	Axilla/Groin	F12	PID00979	SRR30846342	SAMN43830192	Clade3	13	3.A.13.K
NV01243	2024-03-18 21:00:00	Axilla/Groin	F12	PID00979	SRR30846341	SAMN43830191	Clade1	13	1.A.13.D											ERG11: Lys143Arg	FUR1: Gln16*	B9J08_000401: Gln142*
NV01244	2024-04-04 21:00:00	Axilla/Groin	F39	PID00979	SRR30847313	SAMN43830055	Clade1	13	1.A.13.D											ERG11: Lys143Arg	FUR1: Gln16*	B9J08_000401: Gln142*
NV01245	2024-05-22 21:00:00	Axilla/Groin	F39	PID00979	SRR30946239	SAMN44245309	Clade1	13	1.A.13.D											ERG11: Lys143Arg	FUR1: Gln16*	B9J08_000401: Gln142*
NV01246	2024-06-07 21:00:00	Urine	F39	PID00979	SRR33370021	SAMN48199595	Clade1	13	1.A.13.D	0.25	1		>256	1	2	0.5	0.5	2		ERG11: Lys143Arg	FUR1: Gln16*	B9J08_000401: Gln142*
NV01247	2024-08-01 21:00:00	Axilla/Groin	F36	PID00982	SRR33391988	SAMN48270107	Clade3	3	3.A.3.L
NV01248	2024-07-18 21:00:00	Axilla/Groin	F36	PID00983	SRR33388501	SAMN48265005	Clade3	3	3.A.3.L
NV01249	2024-07-18 21:00:00	Wound	F36	PID00983	SRR33388490	SAMN48264965	Clade3	3	3.A.3.L	0.5	0.25		>256	0.25	0.25	0.12	0.25	1
NV01250	2024-03-21 21:00:00	Axilla/Groin	F39	PID00985	SRR30846243	SAMN43830196	Clade1	2	1.A.2.A											ERG11: Lys143Arg		B9J08_000401: Gln142*
NV01251	2024-06-09 21:00:00	Axilla/Groin	F39	PID00985	SRR30946936	SAMN44246121	Clade1	2	1.A.2.A											ERG11: Lys143Arg		B9J08_000401: Gln142*
NV01252	2024-03-09 21:00:00	Axilla/Groin	F36	PID00986	SRR30844125	SAMN43817374	Clade3	13	3.A.13.J
NV01253	2024-03-23 21:00:00	Blood	F36	PID00986	SRR30844573	SAMN43817348	Clade3	13	3.A.13.J	1	0.12		256	0.12	0.25	0.06	0.06	1
NV01254	2024-03-26 21:00:00	Wound	F36	PID00986	SRR30844569	SAMN43817344	Clade3	13	3.A.13.J	0.5	0.12		256	0.12	0.25	0.12	0.12	1
NV01255	2024-04-08 21:00:00	Wound	F36	PID00986	SRR30865489	SAMN43829937	Clade3	13	3.A.13.J	0.5	0.5		256	0.12	0.5	0.25	0.12	2
NV01256	2024-05-26 21:00:00	Trachea	F36	PID00986	SRR30946470	SAMN44245622	Clade3	13	3.A.13.J	0.25	0.25		>256	0.5	0.5	0.12	0.5	1
NV01257	2024-05-26 21:00:00	Trachea	F36	PID00986	SRR30946469	SAMN44245621	Clade1	10	1.A.10.A	0.25	0.25		>256	0.5	0.5	0.12	0.5	1		ERG11: Lys143Arg		B9J08_000401: Gln142*
NV01258	2022-09-06 21:00:00	Skin Swab	F40	PID00988	SRR23248984	SAMN32934613	Clade3	2	3.A.2.A
NV01259	2023-07-13 21:00:00	Axilla/Groin	F39	PID00987	SRR27135650	SAMN38336510	Clade1	11	1.A.11.B											ERG11: Lys143Arg		B9J08_000401: Gln142*
NV01260	2023-09-03 21:00:00	Axilla/Groin	F39	PID00987	SRR27135618	SAMN38336401	Clade1	11	1.A.11.B											ERG11: Lys143Arg		B9J08_000401: Gln142*
NV01261	2024-07-23 21:00:00	Axilla/Groin	F13	PID00989	SRR33388475	SAMN48264950	Clade3	10	3.A.10.D
NV01262	2024-06-19 21:00:00	Axilla/Groin	F33	PID00989	SRR33370057	SAMN48199631	Clade3	10	3.A.10.D
NV01263	2022-08-23 21:00:00	Axilla/Groin	F12	PID03426	SRR23109089	SAMN32670295	Clade3	8	3.A.8.A
NV01264	2022-09-04 21:00:00	Skin Swab	F40	PID00990	SRR23248988	SAMN32934617	Clade3	13	3.A.13.E
NV01265	2022-09-05 21:00:00	Axilla/Groin	F18	PID00990	SRR23109023	SAMN32670229	Clade3	13	3.A.13.E
NV01266	2023-02-06 21:00:00	Axilla/Groin	F14	PID00991	SRR23920766	SAMN33829977	Clade3	10	3.A.10.B
NV01267	2023-09-08 21:00:00	Skin Swab	F15	PID00993	SRR27645431	SAMN39504762	Clade1	13	1.A.13.F	0.5	0.25	0.25	>256	0.5	0.5	0.12	0.25	1		ERG11: Lys143Arg	FUR1: Glu64*	B9J08_000401: Gln142*
NV01268	2023-09-10 21:00:00	Abscess	F15	PID00993	SRR27645429	SAMN39504715	Clade1	13	1.A.13.F	0.5	1	1	>256	4	4	1	2	2		ERG11: Lys143Arg	FUR1: Glu64*	B9J08_000401: Gln142*
NV01269	2023-08-28 21:00:00	Bronchial Washing	F15	PID00993	SRR27645427	SAMN39504742	Clade1	13	1.A.13.F	0.25	0.5	0.5	>256	0.5	0.5	0.5	0.25	2		ERG11: Lys143Arg	FUR1: Glu64*	B9J08_000401: Gln142*
NV01270	2023-08-28 21:00:00	Bronchial Washing	F15	PID00993	SRR27645426	SAMN39504686	Clade1	13	1.A.13.F	0.25	0.5	0.5	>256	0.5	0.5	0.5	0.5	1		ERG11: Lys143Arg	FUR1: Glu64*	B9J08_000401: Gln142*
NV01271	2023-09-10 21:00:00	Wound	F39	PID00993	SRR27645478	SAMN39504740	Clade1	13	1.A.13.F											ERG11: Lys143Arg	FUR1: Glu64*	B9J08_000401: Gln142*
NV01272	2023-09-08 21:00:00	Bronchial Washing	F39	PID00993	SRR27135744	SAMN38336521	Clade1	13	1.A.13.F											ERG11: Lys143Arg	FUR1: Glu64*	B9J08_000401: Gln142*
NV01273	2024-03-26 21:00:00	Blood	F39	PID00993	SRR30844566	SAMN43817341	Clade1	10	1.A.10.A											ERG11: Lys143Arg		B9J08_000401: Gln142*
NV01274	2024-03-26 21:00:00	Blood	F39	PID00993	SRR30946415	SAMN44245444	Clade1	13	1.A.13.F	2	0.5		>256	2	1	0.25	0.5	2		ERG11: Lys143Arg	FUR1: Glu64*	B9J08_000401: Gln142*
NV01275	2023-02-16 21:00:00	Axilla/Groin	F29	PID00994	SRR27636510	SAMN35641131	Clade3	5	3.A.5.C
NV01276	2024-07-12 21:00:00	Urine	F36	PID00999	SRR33388483	SAMN48264958	Clade1	13	1.A.13.D	0.5	1		>256	1	1	0.5	0.5	2		ERG11: Lys143Arg	FUR1: Gln16*	B9J08_000401: Gln142*
NV01277	2022-10-05 21:00:00	Not Indicated	F32	PID01000	SRR23108806	SAMN32670072	Clade3	6	3.A.6.E
NV01278	2023-02-18 21:00:00	Wound	F36	PID01002	SRR27636428	SAMN35641114	Clade1	2	1.A.2.I	0.5	0.5	0.25	256	0.5	1	0.5	0.5	4	FKS1: Leu640Val	ERG11: Lys143Arg		B9J08_000401: Gln142*
NV01279	2023-02-18 21:00:00	Wound	F36	PID01002	SRR27636421	SAMN35641107	Clade1	2	1.A.2.I	0.5	0.5	0.25	256	0.5	0.5	0.25	0.5	4	FKS1: Leu640Val	ERG11: Lys143Arg		B9J08_000401: Gln142*
NV01280	2023-08-24 21:00:00	Axilla/Groin	F27	PID01004	SRR27135635	SAMN38336477	Clade3	13	3.A.13.B
NV01281	2023-07-07 21:00:00	Axilla/Groin	F33	PID01004	SRR27135669	SAMN38336367	Clade3	5	3.A.5.E
NV01282	2024-03-22 21:00:00	Axilla/Groin	F39	PID01006	SRR30846241	SAMN43830194	Clade1	13	1.A.13.C										FKS1: Asp642Tyr	ERG11: Lys143Arg	FUR1: Gly35fs	B9J08_000401: Gln142*
NV01283	2023-01-04 21:00:00	Axilla/Groin	F34	PID01007	SRR23920689	SAMN33829952	Clade3	12	3.A.12.D
NV01284	2023-09-30 21:00:00	Urine	F38	PID01007	SRR27645323	SAMN39504855	Clade1	10	1.A.10.B	0.25	0.5	0.5	>256	0.5	0.5	0.25	0.5	1		ERG11: Lys143Arg		B9J08_000401: Gln142*
NV01285	2024-02-20 21:00:00	Axilla/Groin	F36	PID01008	SRR30844596	SAMN43817301	Clade3	13	3.A.13.D												FUR1: Val103Gly
NV01286	2022-08-31 21:00:00	Axilla/Groin	F33	PID01009	SRR23109035	SAMN32670241	Clade3	3	3.A.3.D
NV01287	2023-10-08 21:00:00	Axilla/Groin	F36	PID01012	SRR27607970	SAMN39273884	Clade3	1	3.A.1.D
NV01288	2023-10-30 21:00:00	Axilla/Groin	F36	PID01012	SRR27607839	SAMN39273806	Clade3	1	3.A.1.D
NV01289	2024-07-16 21:00:00	Axilla/Groin	F36	PID01013	SRR33388520	SAMN48265024	Clade1	4	1.A.4.D											ERG11: Lys143Arg		B9J08_000401: Gln142*
NV01290	2024-03-07 21:00:00	Axilla/Groin	F33	PID01014	SRR30846370	SAMN43817280	Clade1	13	1.A.13.B											ERG11: Lys143Arg	FUR1: Ser84Leu	B9J08_000401: Gln142*
NV01291	2024-03-07 21:00:00	Axilla/Groin	F33	PID01014	SRR30846369	SAMN43817279	Clade3	10	3.A.10.E
NV01292	2024-03-28 21:00:00	Axilla/Groin	F33	PID01014	SRR30847366	SAMN43830108	Clade1	13	1.A.13.B											ERG11: Lys143Arg	FUR1: Ser84Leu	B9J08_000401: Gln142*
NV01293	2024-07-20 21:00:00	Axilla/Groin	F33	PID01014	SRR33388581	SAMN48264996	Clade3	10	3.A.10.E
NV01294	2024-01-27 21:00:00	Urine	F39	PID01014	SRR29363952	SAMN41409286	Clade3	10	3.A.10.E	0.5	0.25		256	0.12	0.25	0.12	0.12	2
NV01295	2024-01-27 21:00:00	Wound	F39	PID01014	SRR29363951	SAMN41409285	Clade3	10	3.A.10.E
NV01296	2024-01-26 21:00:00	Wound	F39	PID01014	SRR29363950	SAMN41409279	Clade3	10	3.A.10.E	0.5	1		256	0.25	0.5	0.25	0.25	2
NV01297	2024-03-07 21:00:00	Urine	F39	PID01014	SRR30844113	SAMN43817362	Clade3	10	3.A.10.E
NV01298	2023-07-30 21:00:00	Wound	F38	PID01015	SRR27135683	SAMN38336480	Clade3	3	3.A.3.M	0.5	0.25	0.06	256	0.25	0.5	0.25	0.12	2
NV01299	2024-04-01 21:00:00	Axilla/Groin	F28	PID01017	SRR30945863	SAMN44244859	Clade3	11	3.A.11.C
NV01300	2022-10-22 21:00:00	Urine	F41	PID01018	SRR23108758	SAMN32670005	Clade3	4	3.A.4.J	0.5	0.5	0.25	128	0.25	0.5		0.25	2
NV01301	2024-01-22 21:00:00	Axilla/Groin	F12	PID01019	SRR29364013	SAMN41409254	Clade1	11	1.A.11.B											ERG11: Lys143Arg
NV01302	2024-02-19 21:00:00	Axilla/Groin	F12	PID01019	SRR30844601	SAMN43817306	Clade3	13	3.A.13.K
NV01303	2024-02-19 21:00:00	Axilla/Groin	F12	PID01019	SRR30844600	SAMN43817305	Clade1	11	1.A.11.B											ERG11: Lys143Arg		B9J08_000401: Gln142*
NV01304	2024-06-18 21:00:00	Axilla/Groin	F12	PID01019	SRR33370050	SAMN48199624	Clade1	11	1.A.11.B											ERG11: Lys143Arg		B9J08_000401: Gln142*
NV01305	2023-09-20 21:00:00	Axilla/Groin	F36	PID01019	SRR27607994	SAMN39273908	Clade3	13	3.A.13.K
NV01306	2023-11-06 21:00:00	Axilla/Groin	F36	PID01019	SRR27718919	SAMN39600292	Clade1	11	1.A.11.B											ERG11: Lys143Arg		B9J08_000401: Gln142*
NV01307	2023-12-28 21:00:00	Axilla/Groin	F36	PID01019	SRR28069414	SAMN40079044	Clade3	13	3.A.13.K
NV01308	2024-02-08 21:00:00	Axilla/Groin	F36	PID01019	SRR29280598	SAMN41409379	Clade1	11	1.A.11.B											ERG11: Lys143Arg		B9J08_000401: Gln142*
NV01309	2024-05-12 21:00:00	Axilla/Groin	F36	PID01019	SRR30945888	SAMN44244884	Clade1	11	1.A.11.B											ERG11: Lys143Arg		B9J08_000401: Gln142*
NV01310	2024-06-09 21:00:00	Axilla/Groin	F36	PID01019	SRR30946933	SAMN44246118	Clade1	11	1.A.11.B											ERG11: Lys143Arg		B9J08_000401: Gln142*
NV01311	2024-06-11 21:00:00	Axilla/Groin	F36	PID01019	SRR33345025	SAMN48181663	Clade1	11	1.A.11.B											ERG11: Lys143Arg		B9J08_000401: Gln142*
NV01312	2024-06-16 21:00:00	Axilla/Groin	F36	PID01019	SRR30946889	SAMN44246074	Clade1	11	1.A.11.B											ERG11: Lys143Arg		B9J08_000401: Gln142*
NV01313	2023-04-24 21:00:00	Axilla/Groin	F39	PID01021	SRR27636434	SAMN35640957	Clade3	10	3.A.10.B
NV01314	2023-06-06 21:00:00	Axilla/Groin	F35	PID01023	SRR27130993	SAMN38336650	Clade3	6	3.A.6.A
NV01315	2024-01-22 21:00:00	Skin Swab	F28	PID01025	SRR29363941	SAMN41409250	Clade1	3	1.A.3.A											ERG11: Lys143Arg	FUR1: Gly106Asp	B9J08_000401: Gln142*
NV01316	2023-05-22 21:00:00	Wound	F39	PID01027	SRR27131001	SAMN38336694	Clade3	4	3.A.4.J	0.5	0.5	0.25	>256	0.25	0.5	0.5	0.5	8
NV01317	2022-11-10 21:00:00	Axilla/Groin	F12	PID01028	SRR23137837	SAMN32797942	Clade3	13	3.A.13.C												FUR1: Val103Gly
NV01318	2024-03-07 21:00:00	Axilla/Groin	F36	PID01029	SRR30847458	SAMN43830183	Clade1	4	1.A.4.E											ERG11: Lys143Arg		B9J08_000401: Gln142*
NV01319	2024-03-31 21:00:00	Axilla/Groin	F36	PID01032	SRR30847354	SAMN43830096	Clade3	3	3.A.3.C
NV01320	2022-07-31 21:00:00	Skin Swab	F40	PID01034	SRR23108930	SAMN32670132	Clade3	3	3.A.3.K
NV01321	2023-06-09 21:00:00	Axilla/Groin	F33	PID01034	SRR27135930	SAMN38336507	Clade1	11	1.A.11.C											ERG11: Lys143Arg		B9J08_000401: Gln142*
NV01322	2022-09-14 21:00:00	Skin Swab	F40	PID01035	SRR23248998	SAMN32934627	Clade3	8	3.A.8.E
NV01323	2022-12-04 21:00:00	Axilla/Groin	F10	PID01037	SRR23137783	SAMN32797890	Clade1	3	1.A.3.A											ERG11: Lys143Arg	FUR1: Gly106Asp	B9J08_000401: Gln142*
NV01324	2023-02-18 21:00:00	Blood	F25	PID01039	SRR27636407	SAMN35641093	Clade3	13	3.A.13.E
NV01325	2022-09-29 21:00:00	Not Indicated	F33	PID01040	SRR23108878	SAMN32670112	Clade3	4	3.A.4.C
NV01326	2023-12-13 21:00:00	Catheter Tip	F36	PID01041	SRR28069408	SAMN40079099	Clade1	3	1.A.3.E	0.5	0.03		>256	0.25	0.5	0.06	0.12	1		ERG11: Lys143Arg		B9J08_000401: Gln142*
NV01327	2023-09-28 21:00:00	Skin Swab	F36	PID01043	SRR27645319	SAMN39504845	Clade3	4	3.A.4.F	0.5	0.5	0.25	>256	0.25	0.5	0.5	0.5	2
NV01328	2023-07-19 21:00:00	Axilla/Groin	F12	PID01044	SRR27130892	SAMN38336627	Clade1	13	1.A.13.E											ERG11: Lys143Arg		B9J08_000401: Gln142*
NV01329	2023-09-24 21:00:00	Blood	F36	PID01045	SRR27645329	SAMN39504823	Clade1	2	1.A.2.I	0.5	0.25	0.25	>256	0.5	0.5	0.25	0.25	1		ERG11: Lys143Arg	FUR1: Ter219Trpext*?	B9J08_000401: Gln142*
NV01330	2024-01-29 21:00:00	Blood	F36	PID01045	SRR29363982	SAMN41409309	Clade3	11	3.A.11.B
NV01331	2024-08-19 21:00:00	Urine	F36	PID01045	SRR33392006	SAMN48270036	Clade1	2	1.A.2.I	0.25	0.25		>256	1	1	0.12	0.25	4		ERG11: Lys143Arg	FUR1: Ter219Trpext*?	B9J08_000401: Gln142*
NV01332	2024-12-06	Urine	F39	PID03524	SRR33405943	SAMN48288192	Clade3	5	3.A.5.G	2	0.5		256	0.25	0.5	0.25	0.25	2
NV01333	2024-03-25 21:00:00	Axilla/Groin	F36	PID01046	SRR30847385	SAMN43830127	Clade1	13	1.A.13.C										FKS1: Asp642Tyr	ERG11: Lys143Arg		B9J08_000401: Gln142*
NV01334	2024-07-15 21:00:00	Urine	F39	PID01047	SRR33388478	SAMN48264953	Clade1	9	1.A.9.A	0.5	0.25		256	0.12	0.12	0.12	0.12	1		ERG11: Lys143Arg		B9J08_000401: Gln142*
NV01335	2022-06-15 21:00:00	Axilla/Groin	F12	PID03410	SRR23958462	SAMN30468036	Clade3	2	3.A.2.C
NV01336	2023-11-13 21:00:00	Axilla/Groin	F36	PID01048	SRR27645365	SAMN39504641	Clade1	3	1.A.3.D											ERG11: Lys143Arg		B9J08_000401: Gln142*
NV01337	2024-03-21 21:00:00	Axilla/Groin	F36	PID01048	SRR30847425	SAMN43830150	Clade1	3	1.A.3.E											ERG11: Lys143Arg		B9J08_000401: Gln142*
NV01338	2023-09-11 21:00:00	Urine	F39	PID01048	SRR27645469	SAMN39504744	Clade1	3	1.A.3.D											ERG11: Lys143Arg
NV01339	2023-09-22 21:00:00	Urine	F39	PID01048	SRR27645411	SAMN39504759	Clade1	3	1.A.3.D	0.5	0.5	0.5	>256	0.5	0.5	0.5	0.5	1		ERG11: Lys143Arg
NV01340	2022-10-26 21:00:00	Axilla/Groin	F32	PID01050	SRR23137867	SAMN32797972	Clade3	4	3.A.4.C
NV01341	2023-10-20 21:00:00	Axilla/Groin	F12	PID01051	SRR27607862	SAMN39273829	Clade3	3	3.A.3.C
NV01342	2023-10-04 21:00:00	Axilla/Groin	F10	PID01051	SRR27607981	SAMN39273895	Clade3	3	3.A.3.C
NV01343	2023-10-16 21:00:00	Axilla/Groin	F10	PID01051	SRR27607913	SAMN39273859	Clade3	3	3.A.3.C
NV01344	2023-12-19 21:00:00	Axilla/Groin	F10	PID01051	SRR28069446	SAMN40079108	Clade3	3	3.A.3.C
NV01345	2024-10-27	Urine	F38	PID01051	SRR33403259	SAMN48286647	Clade3	3	3.A.3.C	0.5	2		>256	0.5	1	0.5	0.5	8
NV01346	2022-09-28 21:00:00	Skin Swab	F40	PID01054	SRR23920641	SAMN33829862	Clade3	4	3.A.4.O
NV01347	2023-02-12 21:00:00	Axilla/Groin	F33	PID01054	SRR23920692	SAMN33829955	Clade3	4	3.A.4.O
NV01348	2024-04-25 21:00:00	Axilla/Groin	F33	PID01055	SRR30868002	SAMN43829803	Clade3	3	3.A.3.K
NV01349	2024-04-25 21:00:00	Urine	F39	PID01055	SRR30866556	SAMN43829826	Clade3	3	3.A.3.K	0.5	0.5		>256	0.25	0.5	0.25	0.25	2
NV01350	2024-04-25 21:00:00	Axilla/Groin	F33	PID01055	SRR30866613	SAMN43829883	Clade3	3	3.A.3.K
NV01351	2024-04-20 21:00:00	Urine	F38	PID01055	SRR30866626	SAMN43829896	Clade3	3	3.A.3.K	0.5	0.25		>256	0.25	0.5	0.12	0.12	4
NV01352	2023-09-18 21:00:00	Axilla/Groin	F02	PID01056	SRR27645456	SAMN39504881	Clade3	5	3.A.5.F
NV01353	2022-06-07 21:00:00	Skin	F40	PID01057	SRR23958549	SAMN30468123	Clade3	5	3.A.5.E
NV01354	2023-04-26 21:00:00	Skin Swab	F31	PID01057	SRR27636287	SAMN35640948	Clade1	3	1.A.3.A	0.25	0.5	0.25	>256	1	1	0.25	0.5	1		ERG11: Lys143Arg		B9J08_000401: Gln142*
NV01355	2024-06-09 21:00:00	Axilla/Groin	F36	PID01057	SRR30946931	SAMN44246116	Clade1	2	1.A.2.E											ERG11: Lys143Arg		B9J08_000401: Gln142*
NV01356	2024-06-08 21:00:00	Axilla/Groin	F36	PID01057	SRR30946920	SAMN44246105	Clade1	2	1.A.2.E											ERG11: Lys143Arg		B9J08_000401: Gln142*
NV01357	2024-06-01 21:00:00	Axilla/Groin	F02	PID01058	SRR30946402	SAMN44245431	Clade1	2	1.A.2.H											ERG11: Lys143Arg		B9J08_000401: Gln142*
NV01358	2024-07-11 21:00:00	Axilla/Groin	F02	PID01058	SRR33381089	SAMN48209721	Clade1	2	1.A.2.H											ERG11: Lys143Arg		B9J08_000401: Gln142*
NV01359	2024-12-03	Wound	F36	PID03525	SRR33405939	SAMN48288188	Clade1	3	1.A.3.B	0.5	2		>256	0.5	1	0.5	0.5	4		ERG11: Lys143Arg		B9J08_000401: Gln142*
NV01360	2024-04-01 21:00:00	Axilla/Groin	F39	PID01061	SRR30865549	SAMN43829997	Clade3	12	3.A.12.H
NV01361	2024-04-05 21:00:00	Axilla/Groin	F02	PID01064	SRR30847321	SAMN43830063	Clade3	11	3.A.11.C
NV01362	2024-06-26 21:00:00	Axilla/Groin	F36	PID01066	SRR33369972	SAMN48199559	Clade1	2	1.B.2.A											ERG11: Tyr132Phe
NV01363	2024-11-05	Wound	F36	PID03526	SRR33405890	SAMN48288261	Clade3	3	3.A.3.I	1	2		256	0.25	1	1	0.5	4
NV01364	2024-11-05	Wound	F36	PID03526	SRR33405887	SAMN48288258	Clade3	3	3.A.3.I	0.5	2		>256	0.25	1	0.5	0.5	4
NV01365	2022-11-04 21:00:00	Axilla/Groin	F06	PID01068	SRR23137849	SAMN32797954	Clade1	13	1.A.13.B											ERG11: Lys143Arg		B9J08_000401: Gln142*
NV01366	2023-04-17 21:00:00	Axilla/Groin	F23	PID01069	SRR27636451	SAMN35640962	Clade3	11	3.A.11.A
NV01367	2023-08-12 21:00:00	Axilla/Groin	F33	PID01070	SRR27135872	SAMN38336777	Clade1	13	1.A.13.A											ERG11: Lys143Arg		B9J08_000401: Gln142*
NV01368	2023-12-18 21:00:00	Skin Swab	F36	PID01071	SRR28069384	SAMN40079075	Clade1	1	1.B.1.A	0.5	2		128	0.06	0.25	0.5	0.06	0.5	FKS1: Arg1354His	ERG11: Tyr132Phe
NV01369		Urine	F36	PID01072	SRR27130932	SAMN38336619	Clade3	8	3.A.8.A	1	0.5	0.25	256	0.12	0.5	0.12	0.25	2
NV01370	2023-05-31 21:00:00	Skin Swab	F31	PID01073	SRR27130985	SAMN38336709	Clade3	4	3.A.4.G	1	1		256	0.25	0.5	0.25	0.12	2
NV01371	2024-06-10 21:00:00	Axilla/Groin	F12	PID01075	SRR30946925	SAMN44246110	Clade3	4	3.A.4.L
NV01372	2024-06-22 21:00:00	Blood	F25	PID01075	SRR30947152	SAMN44246244	Clade3	4	3.A.4.L	1	0.25		>256	0.5	0.5	0.12	0.25	2
NV01373	2023-08-24 21:00:00	Urine	F36	PID01075	SRR27130911	SAMN38336689	Clade3	4	3.A.4.L
NV01374	2024-10-02	Urine	F39	PID03527	SRR33403298	SAMN48286686	Clade3	5	3.A.5.D	0.5	0.5		256	0.12	0.5	0.25	0.25	2
NV01375	2022-10-11 21:00:00	Wound	F36	PID01076	SRR23108899	SAMN32670037	Clade3	4	3.A.4.K	1	0.5	0.25	64	0.12	0.5	0.25	0.25	1
NV01376	2022-10-11 21:00:00	Wound	F36	PID01076	SRR23920638	SAMN33829859	Clade3	4	3.A.4.J	1	0.5	0.25	64	0.12	0.5	0.25	0.25	1
NV01377	2024-09-28	Urine	F36	PID03528	SRR33403280	SAMN48286668	Clade3	6	3.A.6.A	0.5	0.5		64	0.12	0.25	0.5	0.25	1
NV01378	2024-09-29	Wound	F36	PID03528	SRR33403277	SAMN48286665	Clade1	1	1.B.1.A	0.5	0.5		32	0.06	0.12	0.5	0.12	0.25	FKS1: Arg1354His	ERG11: Tyr132Phe
NV01379	2023-04-10 21:00:00	Axilla/Groin	F25	PID01078	SRR27636320	SAMN35640864	Clade3	7	3.A.7.B
NV01380	2022-08-30 21:00:00	Axilla/Groin	F17	PID01079	SRR23109036	SAMN32670242	Clade3	5	3.A.5.B
NV01381	2024-10-10	Axilla/Groin	F15	PID03529	SRR33405911	SAMN48288282	Clade1	3	1.B.3.A	0.5	0.25		32	0.03	0.12	0.06	0.06	0.25		ERG11: Tyr132Phe
NV01382	2024-07-10 21:00:00	Axilla/Groin	F36	PID01086	SRR33381092	SAMN48209724	Clade1	1	1.B.1.A										FKS1: Arg1354His	ERG11: Tyr132Phe
NV01383	2023-02-12 21:00:00	Axilla/Groin	F34	PID01089	SRR27636525	SAMN35641146	Clade3	13	3.A.13.E												FUR1: Cys81Tyr
NV01384	2023-10-30 21:00:00	Axilla/Groin	F28	PID01077	SRR27718921	SAMN39600258	Clade3	13	3.A.13.K
NV01385	2023-12-25 21:00:00	Axilla/Groin	F36	PID01080	SRR28069433	SAMN40079063	Clade3	13	3.A.13.G
NV01386	2023-12-24 21:00:00	Skin Swab	F36	PID01080	SRR29364658	SAMN41409075	Clade3	13	3.A.13.G	1	0.25		256	0.12	0.12	0.12	0.03	1
NV01387	2023-10-31 21:00:00	Axilla/Groin	F36	PID01090	SRR27645239	SAMN39504612	Clade1	4	1.B.4.A											ERG11: Tyr132Phe
NV01388	2024-01-10 21:00:00	Axilla/Groin	F36	PID01090	SRR29365145	SAMN41409163	Clade1	9	1.A.9.A											ERG11: Lys143Arg		B9J08_000401: Gln142*
NV01389	2024-05-19 21:00:00	Axilla/Groin	F23	PID01091	SRR30946488	SAMN44245640	Clade1	3	1.A.3.C											ERG11: Lys143Arg		B9J08_000401: Gln142*
NV01390	2024-07-26 21:00:00	Skin Swab	F36	PID01091	SRR33388547	SAMN48264932	Clade1	3	1.A.3.C											ERG11: Lys143Arg		B9J08_000401: Gln142*
NV01391	2024-02-25 21:00:00	Axilla/Groin	F36	PID01092	SRR29280534	SAMN41409473	Clade3	5	3.A.5.F
NV01392	2024-09-17	Wound	F36	PID01092	SRR33403350	SAMN48286708	Clade3	13	3.A.13.L	0.5	0.25		64	0.12	0.25	0.12	0.12	0.5
NV01393	2024-09-24	Blood	F36	PID01092	SRR33403283	SAMN48286671	Clade3	13	3.A.13.L	0.5	0.12		64	0.06	0.12	0.12	0.12	1
NV01394	2024-01-12 21:00:00	Wound	F39	PID01093	SRR29365102	SAMN41409170	Clade1	4	1.B.4.A	0.5	0.5		>256	0.12	0.25	0.12	0.12	2		ERG11: Tyr132Phe
NV01395	2022-01-20	Blood	F36	PID03391	SRR19738665	SAMN29101380	Clade3	3	3.A.3.I
NV01396	2023-07-14 21:00:00	Axilla/Groin	F39	PID01094	SRR27135649	SAMN38336558	Clade1	4	1.B.4.A											ERG11: Tyr132Phe
NV01397	2023-07-24 21:00:00	Axilla/Groin	F39	PID01094	SRR27130890	SAMN38336721	Clade1	4	1.B.4.A											ERG11: Tyr132Phe
NV01398	2022-11-29 21:00:00	Trachea	F36	PID01095	SRR23137795	SAMN32797900	Clade3	2	3.A.2.A	1	1	0.25	>256	0.25	0.5	0.5	0.25	2
NV01399	2024-04-04 21:00:00	Axilla/Groin	F35	PID01097	SRR30847319	SAMN43830061	Clade3	4	3.A.4.E
NV01400	2024-01-24 21:00:00	Axilla/Groin	F39	PID01097	SRR29364006	SAMN41409266	Clade1	12	1.A.12.A											ERG11: Lys143Arg	FUR1: Arg101Leu	B9J08_000401: Gln142*
NV01401	2023-05-29 21:00:00	Axilla/Groin	F29	PID01098	SRR27135712	SAMN38336295	Clade3	3	3.A.3.I
NV01402	2023-11-24 21:00:00	Axilla/Groin	F39	PID01101	SRR27718892	SAMN39600259	Clade3	13	3.A.13.K
NV01403	2024-03-17 21:00:00	Axilla/Groin	F36	PID01102	SRR30846291	SAMN43830244	Clade3	6	3.A.6.G										FKS1: Ile301Phe
NV01404	2024-03-17 21:00:00	Axilla/Groin	F36	PID01102	SRR30846290	SAMN43830243	Clade1	13	1.A.13.F											ERG11: Lys143Arg	FUR1: Glu64*	B9J08_000401: Gln142*
NV01405	2022-12-04 21:00:00	Urine	F41	PID01105	SRR27135979	SAMN38336554	Clade3	4	3.A.4.D	0.5	0.25	0.12	64	0.06	0.25	0.12	0.12	2
NV01406	2024-07-23 21:00:00	Axilla/Groin	F36	PID01107	SRR30947142	SAMN44246236	Clade1	12	1.A.12.C											ERG11: Lys143Arg	FUR1: Arg101Leu	B9J08_000401: Gln142*
NV01407	2023-04-09 21:00:00	Axilla/Groin	F10	PID01109	SRR27636328	SAMN35640932	Clade3	3	3.A.3.K
NV01408	2023-02-06 21:00:00	Axilla/Groin	F14	PID01110	SRR23920747	SAMN33829975	Clade1	2	1.A.2.H											ERG11: Lys143Arg		B9J08_000401: Gln142*
NV01409	2022-05-08 21:00:00	Axilla/Groin	F14	PID01110	SRR23958489	SAMN30468063	Clade3	13	3.A.13.B
NV01410	2024-01-14 21:00:00	Axilla/Groin	F39	PID01112	SRR29365135	SAMN41409174	Clade3	11	3.A.11.H
NV01411	2023-03-13 21:00:00	Axilla/Groin	F35	PID01114	SRR27636478	SAMN35641035	Clade3	5	3.A.5.G
NV01412	2024-09-27	Blood	F39	PID03529	SRR33403300	SAMN48286688	Clade1	3	1.B.3.A	0.5	0.25		32	0.03	0.12	0.12	0.06	0.25		ERG11: Tyr132Phe
NV01413	2024-05-17 21:00:00	Axilla/Groin	F36	PID01116	SRR30946220	SAMN44245336	Clade3	4	3.A.4.D
NV01414	2023-06-08 21:00:00	Blood	F38	PID01117	SRR27135928	SAMN38336330	Clade3	4	3.A.4.B	0.5	0.03		256	0.5	0.5	0.03	0.12	2
NV01415	2023-01-07 21:00:00	Catheter Tip	F41	PID01118	SRR23248980	SAMN32934609	Clade3	13	3.A.13.A	0.25	0.12	0.06	256	0.12	0.12	0.12	0.06	2
NV01416	2023-08-23 21:00:00	Axilla/Groin	F12	PID01119	SRR27135622	SAMN38336296	Clade1	10	1.A.10.B											ERG11: Lys143Arg		B9J08_000401: Gln142*
NV01417	2024-08-05 21:00:00	Axilla/Groin	F36	PID01120	SRR33391979	SAMN48270098	Clade3	11	3.A.11.A										FKS1: Ser639Tyr		FUR1: Gly35fs
NV01418	2023-08-28 21:00:00	Urine	F38	PID01120	SRR27130912	SAMN38336599	Clade3	11	3.A.11.A	1	0.25	0.12	>256	0.25	0.5	0.25	0.25	1
NV01419	2024-01-08 21:00:00	Skin Swab	F39	PID01120	SRR28069413	SAMN40079043	Clade3	11	3.A.11.A	0.25	4		256	0.12	0.25	4	0.12	1	FKS1: Ser639Tyr
NV01420	2024-10-13	Wound	F36	PID01120	SRR33403235	SAMN48286595	Clade3	11	3.A.11.A	0.5	2		128	0.06	0.25	4	0.12	1	FKS1: Ser639Tyr		FUR1: Gly35fs
NV01421	2024-10-05	Blood	F08	PID01121	SRR33403271	SAMN48286659	Clade1	12	1.A.12.B	0.5	0.5		256	0.5	0.5	0.25	0.25	2		ERG11: Lys143Arg	FUR1: Arg101Leu	B9J08_000401: Gln142*
NV01422	2023-12-13 21:00:00	Bone	F36	PID01121	SRR28069404	SAMN40079095	Clade1	12	1.A.12.B	0.5	0.25		>256	0.5	0.5	0.12	0.25	1		ERG11: Lys143Arg	FUR1: Arg101Leu	B9J08_000401: Gln142*
NV01423	2024-07-25 21:00:00	Axilla/Groin	F36	PID01121	SRR33388550	SAMN48264935	Clade1	12	1.A.12.B											ERG11: Lys143Arg	FUR1: Arg101Leu	B9J08_000401: Gln142*
NV01424	2024-07-25 21:00:00	Wound	F36	PID01121	SRR33392060	SAMN48270147	Clade1	12	1.A.12.B	0.25	0.25		128	0.12	0.25	0.12	0.12	1		ERG11: Lys143Arg	FUR1: Arg101Leu	B9J08_000401: Gln142*
NV01425	2024-07-25 21:00:00	Wound	F36	PID01121	SRR33392038	SAMN48270125	Clade1	12	1.A.12.B	0.5	0.12		128	0.12	0.25	0.12	0.12	1		ERG11: Lys143Arg	FUR1: Arg101Leu	B9J08_000401: Gln142*
NV01426	2024-11-06	Urine	F36	PID01121	SRR33405860	SAMN48288255	Clade1	12	1.A.12.B	0.25	2		>256	0.5	2	1	1	2		ERG11: Lys143Arg	FUR1: Arg101Leu	B9J08_000401: Gln142*
NV01427	2024-12-05	Urine	F36	PID01121	SRR33405932	SAMN48288181	Clade1	12	1.A.12.B	0.5	2		>256	1	1	1	1	8		ERG11: Lys143Arg	FUR1: Arg101Leu	B9J08_000401: Gln142*
NV01428	2022-10-05 21:00:00	Catheter Tip	F41	PID01122	SRR23108924	SAMN32670062	Clade3	1	3.A.1.C	0.5	0.5	0.25	>256	0.25	0.5	0.5	0.25	2
NV01429	2024-11-25	Wound	F36	PID03530	SRR33405814	SAMN48288210	Clade1	1	1.B.1.A	1	2		>256	0.5	0.5	1	0.25	8	FKS1: Arg1354His	ERG11: Tyr132Phe
NV01430	2024-01-04 21:00:00	Wound	F36	PID01123	SRR29364624	SAMN41409121	Clade1	2	1.A.2.B	0.25	1		>256	0.25	0.5	0.5	0.25	4		ERG11: Lys143Arg		B9J08_000401: Gln142*
NV01431	2023-07-23 21:00:00	Axilla/Groin	F30	PID01124	SRR27135767	SAMN38336337	Clade1	2	1.A.2.H											ERG11: Lys143Arg		B9J08_000401: Gln142*
NV01432	2022-10-25 21:00:00	Urine	F41	PID01125	SRR23108757	SAMN32670004	Clade1	11	1.A.11.A	0.25	1	0.5	256	0.5	0.5		0.5	2		ERG11: Lys143Arg		B9J08_000401: Gln142*
NV01433	2023-08-28 21:00:00	Axilla/Groin	F14	PID01126	SRR27135625	SAMN38336258	Clade3	5	3.A.5.D
NV01434	2024-03-24 21:00:00	Wound	F36	PID01127	SRR30844578	SAMN43817353	Clade1	2	1.B.2.A	1	0.25		128	0.03	0.06	0.12	0.03	0.25		ERG11: Tyr132Phe
NV01435	2024-05-12 21:00:00	Axilla/Groin	F36	PID01127	SRR30946524	SAMN44245676	Clade1	2	1.B.2.A											ERG11: Tyr132Phe
NV01436	2024-05-12 21:00:00	Axilla/Groin	F36	PID01127	SRR30945890	SAMN44244886	Clade3	3	3.A.3.J
NV01437	2023-09-27 21:00:00	Skin Swab	F39	PID01128	SRR27645328	SAMN39504849	Clade3	6	3.A.6.B	1	0.5	0.25	>256	0.25	0.5	0.5	0.25	2
NV01438	2022-04-20 21:00:00	Skin	F12	PID03363	SRR23958511	SAMN30468085	Clade3	12	3.A.12.D
NV01439	2024-01-29 21:00:00	Axilla/Groin	F02	PID01131	SRR29363960	SAMN41409304	Clade1	10	1.A.10.A											ERG11: Lys143Arg		B9J08_000401: Gln142*
NV01440	2024-08-22 21:00:00	Wound	F36	PID01133	SRR33391939	SAMN48270029	Clade3	4	3.A.4.A	0.5	0.5		>256	0.12	0.25	0.12	0.06	4
NV01441	2022-05-09 21:00:00	Skin	F31	PID01132	SRR19738709	SAMN29101420	Clade3	5	3.A.5.E	0.5	0.5	0.25	>256	0.25	0.25	0.25	0.12	1
NV01442	2024-02-16 21:00:00	Axilla/Groin	F36	PID01134	SRR30844615	SAMN43817320	Clade3	11	3.A.11.F
NV01443	2024-02-16 21:00:00	Axilla/Groin	F36	PID01134	SRR30844614	SAMN43817319	Clade1	3	1.A.3.E											ERG11: Lys143Arg		B9J08_000401: Gln142*
NV01444	2024-02-16 21:00:00	Wound	F36	PID01134	SRR29280470	SAMN41409420	Clade1	1	1.B.1.A											ERG11: Tyr132Phe
NV01445	2024-02-16 21:00:00	Wound	F36	PID01134	SRR29280467	SAMN41409422	Clade1	5	1.B.5.A	0.5	0.5		128	0.25	0.5	0.25	0.12	2		ERG11: Tyr132Phe
NV01446	2024-02-16 21:00:00	Wound	F36	PID01134	SRR29280466	SAMN41409421	Clade3	6	3.A.6.F	0.5	0.5		128	0.25	0.5	0.25	0.12	2
NV01447	2022-10-11 21:00:00	Wound	F36	PID01138	SRR23108765	SAMN32670012	Clade1	11	1.A.11.A	0.12	1	0.5	>256	0.5	1	0.5	0.25	4		ERG11: Lys143Arg		B9J08_000401: Gln142*
NV01448	2024-05-29 21:00:00	Axilla/Groin	F39	PID01141	SRR30946464	SAMN44245616	Clade3	11	3.A.11.D
NV01449	2023-09-21 21:00:00	Axilla/Groin	F35	PID01140	SRR27645415	SAMN39504761	Clade1	2	1.A.2.I											ERG11: Lys143Arg		B9J08_000401: Gln142*
NV01450	2022-08-01 21:00:00	Skin Swab	F40	PID01144	SRR23108891	SAMN32670125	Clade3	11	3.A.11.A
NV01451	2022-10-12 21:00:00	Skin Swab	F40	PID01144	SRR23108912	SAMN32670050	Clade3	11	3.A.11.A
NV01452	2022-08-01 21:00:00	Sputum	F31	PID01144	SRR23109211	SAMN32670331	Clade3	11	3.A.11.A	1	0.5	0.25	256	0.12	0.12	0.12	0.12	1
NV01453	2022-08-14 21:00:00	Blood	F38	PID01144	SRR23109095	SAMN32670301	Clade3	11	3.A.11.A	0.25	0.06	0.03	256	0.06	0.12		0.06	1
NV01454	2024-01-31 21:00:00	Axilla/Groin	F39	PID01151	SRR29363947	SAMN41409318	Clade3	13	3.A.13.K
NV01455	2024-04-15 21:00:00	Axilla/Groin	F39	PID01151	SRR30865518	SAMN43829966	Clade3	11	3.A.11.H
NV01456	2022-02-22	Blood	F36	PID03431	SRR19738643	SAMN29101360	Clade3	7	3.A.7.A	1	2	1	>256	0.5	0.5	1	0.5	4
NV01457	2024-01-19 21:00:00	Urine	F38	PID01145	SRR29365072	SAMN41409223	Clade1	11	1.A.11.B	0.25	0.5		>256	0.25	0.5	0.12	0.12	2		ERG11: Lys143Arg		B9J08_000401: Gln142*
NV01458	2022-10-16 21:00:00	Axilla/Groin	F02	PID01146	SRR23108784	SAMN32670031	Clade3	5	3.A.5.E
NV01459	2022-04-26 21:00:00	Axilla/Groin	F13	PID03382	SRR23958497	SAMN30468071	Clade3	5	3.A.5.E
NV01460	2023-10-26 21:00:00	Bronchial Washing	F15	PID01148	SRR27718911	SAMN39600307	Clade1	13	1.A.13.B											ERG11: Lys143Arg		B9J08_000401: Gln142*
NV01461	2023-12-21 21:00:00	Skin Swab	F36	PID01150	SRR29364657	SAMN41409063	Clade3	13	3.A.13.L	1	0.5		>256	0.12	0.12	0.12	0.03	2
NV01462	2022-04-20 21:00:00	Skin	F31	PID01152	SRR19738718	SAMN29101437	Clade3	1	3.A.1.C
NV01463	2024-03-10 21:00:00	Axilla/Groin	F36	PID01147	SRR30844128	SAMN43817377	Clade3	13	3.A.13.D												FUR1: Val103Gly
NV01464	2022-05-10 21:00:00	Skin	F03	PID03395	SRR23958484	SAMN30468058	Clade1	13	1.A.13.B											ERG11: Lys143Arg		B9J08_000401: Gln142*
NV01465	2023-10-10 21:00:00	Axilla/Groin	F10	PID01153	SRR27607965	SAMN39273879	Clade3	4	3.A.4.J
NV01466	2022-07-01	Urine	F17	PID03531	SRR23109133	SAMN32670371	Clade3	6	3.A.6.B	0.5	0.5	0.25	128	0.25	0.5	0.5	0.25	1
NV01467	2023-10-12 21:00:00	Joint	F36	PID01154	SRR27645408	SAMN39504868	Clade3	6	3.A.6.E	1	0.5	0.25	>256	0.25	0.5	0.25	0.25	2
NV01468	2022-10-28 21:00:00	Blood	F36	PID01154	SRR23108851	SAMN32669989	Clade3	6	3.A.6.E	0.5	0.25	0.25	256	0.12	0.5		0.25	2
NV01469	2022-12-19 21:00:00	Blood	F36	PID01154	SRR23137737	SAMN32797844	Clade3	6	3.A.6.E	0.25	0.12	0.06	256	0.12	0.5	0.06	0.25	2
NV01470	2023-10-12 21:00:00	Tissue	F36	PID01154	SRR27645398	SAMN39504867	Clade3	6	3.A.6.E	0.5	0.5		>256	0.06	0.12	0.12	0.03	2
NV01471	2024-08-31 21:00:00	Wound	F36	PID01156	SRR33403362	SAMN48286720	Clade3	13	3.A.13.M	0.5	0.5		>256	0.12	0.5	0.25	0.12	4
NV01472	2022-06-08 21:00:00	Skin	F40	PID01157	SRR23958532	SAMN30468106	Clade3	5	3.A.5.E
NV01473	2023-10-16 21:00:00	Axilla/Groin	F29	PID01157	SRR27645402	SAMN39504788	Clade1	10	1.A.10.B											ERG11: Lys143Arg		B9J08_000401: Gln142*
NV01474	2023-11-02 21:00:00	Axilla/Groin	F36	PID01158	SRR27607825	SAMN39273792	Clade1	11	1.A.11.A											ERG11: Lys143Arg		B9J08_000401: Gln142*
NV01475	2023-07-28 21:00:00	Axilla/Groin	F33	PID01158	SRR27135703	SAMN38336566	Clade1	11	1.A.11.A											ERG11: Lys143Arg		B9J08_000401: Gln142*
NV01476	2023-07-18 21:00:00	Axilla/Groin	F02	PID01159	SRR27135783	SAMN38336426	Clade3	4	3.A.4.J
NV01477	2024-04-04 21:00:00	Wound	F36	PID01160	SRR30865493	SAMN43829941	Clade3	13	3.A.13.B	0.5	0.5		>256	0.5	0.5	0.12	0.12	2
NV01478	2024-06-07 21:00:00	Axilla/Groin	F36	PID01161	SRR30946939	SAMN44246124	Clade3	13	3.A.13.D												FUR1: Val103Gly
NV01479	2024-06-12 21:00:00	Axilla/Groin	F36	PID01161	SRR30946910	SAMN44246095	Clade3	13	3.A.13.D												FUR1: Val103Gly
NV01480	2023-09-05 21:00:00	Skin Swab	F39	PID01162	SRR27645502	SAMN39504685	Clade3	11	3.A.11.H
NV01481	2023-11-16 21:00:00	Skin Swab	F39	PID01162	SRR27607881	SAMN39273731	Clade3	11	3.A.11.H
NV01482	2024-05-21 21:00:00	Axilla/Groin	F33	PID01163	SRR30946483	SAMN44245635	Clade1	5	1.B.5.A											ERG11: Tyr132Phe
NV01483	2023-10-19 21:00:00	Urine	F15	PID01164	SRR27607865	SAMN39273832	Clade1	1	1.B.1.A	1	0.12		256	0.25	0.5	0.12	0.25	0.5		ERG11: Tyr132Phe
NV01484	2023-11-26 21:00:00	Axilla/Groin	F02	PID01165	SRR27645297	SAMN39504646	Clade3	4	3.A.4.O
NV01485	2023-12-09 21:00:00	Urine	F38	PID01165	SRR27718930	SAMN39600269	Clade3	4	3.A.4.O	1	0.25		256	0.12	0.5	0.25	0.12	1
NV01486	2023-05-08 21:00:00	Axilla/Groin	F14	PID01166	SRR27636233	SAMN35640884	Clade3	7	3.A.7.B
NV01487	2022-09-23 21:00:00	Trachea	F36	PID01167	SRR23108931	SAMN32670133	Clade3	1	3.A.1.D	1	0.5	0.25	256	0.12	0.25	0.25	0.25	2
NV01488	2022-10-08 21:00:00	Blood	F36	PID01167	SRR23108904	SAMN32670042	Clade3	1	3.A.1.D	0.25	0.12	0.12	128	0.06	0.25	0.12	0.12	0.5
NV01489	2022-10-21 21:00:00	Bone	F36	PID01167	SRR23108762	SAMN32670009	Clade3	8	3.A.8.A	0.5	0.5	0.12	>256	0.25	0.5		0.12	2
NV01490	2022-11-22 21:00:00	Bronchial Washing	F36	PID01167	SRR23137771	SAMN32797878	Clade3	1	3.A.1.D	0.25	0.5	0.12	128	0.12	0.25	0.12	0.12	1
NV01491	2024-04-17 21:00:00	Axilla/Groin	F36	PID01170	SRR30865485	SAMN43829933	Clade1	13	1.A.13.B											ERG11: Lys143Arg		B9J08_000401: Gln142*
NV01492	2024-03-21 21:00:00	Axilla/Groin	F36	PID01170	SRR30847436	SAMN43830161	Clade1	13	1.A.13.B											ERG11: Lys143Arg		B9J08_000401: Gln142*
NV01493	2024-05-07 21:00:00	Axilla/Groin	F36	PID01170	SRR30867964	SAMN43829765	Clade1	13	1.A.13.B											ERG11: Lys143Arg		B9J08_000401: Gln142*
NV01494	2023-04-09 21:00:00	Axilla/Groin	F34	PID01171	SRR27636331	SAMN35640866	Clade3	11	3.A.11.H
NV01495	2023-11-22 21:00:00	Axilla/Groin	F36	PID01173	SRR27718896	SAMN39600223	Clade3	3	3.A.3.J
NV01496	2024-11-14	Urine	F36	PID03532	SRR33405846	SAMN48288242	Clade3	6	3.A.6.F	0.5	1		128	0.25	0.5	0.5	0.25	2
NV01497	2023-06-06 21:00:00	Urine	F38	PID01175	SRR27130988	SAMN38336634	Clade1	4	1.B.4.A	1	0.25		64	0.03	0.12	0.06	0.03	0.25		ERG11: Tyr132Phe
NV01498	2023-11-07 21:00:00	Axilla/Groin	F33	PID01177	SRR27645234	SAMN39504644	Clade3	11	3.A.11.H
NV01499	2023-09-18 21:00:00	Axilla/Groin	F36	PID01178	SRR27645454	SAMN39504755	Clade3	12	3.A.12.G
NV01500	2024-04-29 21:00:00	Wound	F05	PID01180	SRR30867960	SAMN43829761	Clade3	11	3.A.11.J	0.5	0.12		64	0.25	0.25	0.12	0.25	0.5
NV01501	2024-06-02 21:00:00	Axilla/Groin	F36	PID01181	SRR30946454	SAMN44245606	Clade1	4	1.A.4.A											ERG11: Lys143Arg		B9J08_000401: Gln142*
NV01502	2023-09-12 21:00:00	Axilla/Groin	F10	PID01182	SRR27645485	SAMN39504738	Clade3	13	3.A.13.D												FUR1: Val103Gly
NV01503	2024-02-03 21:00:00	Groin	F36	PID01183	SRR29280605	SAMN41409333	Clade3	13	3.A.13.K
NV01504	2024-03-02 21:00:00	Axilla/Groin	F33	PID01185	SRR29278659	SAMN41409504	Clade3	12	3.A.12.F
NV01505	2024-03-05 21:00:00	Axilla/Groin	F14	PID01186	SRR30846372	SAMN43817282	Clade3	13	3.A.13.L
NV01506	2023-04-12 21:00:00	Axilla/Groin	F14	PID01188	SRR27636308	SAMN35640944	Clade3	3	3.A.3.A
NV01507	2024-03-12 21:00:00	Axilla/Groin	F36	PID01189	SRR30846289	SAMN43830242	Clade3	3	3.A.3.D
NV01508	2023-03-20 21:00:00	Blood	F36	PID01190	SRR27636346	SAMN35641001	Clade3	3	3.A.3.K	0.5	0.5	0.25	256	0.25	0.5	0.25	0.25	4
NV01509	2023-10-04 21:00:00	Not Indicated	F36	PID01191	SRR27607979	SAMN39273893	Clade3	3	3.A.3.F
NV01510	2023-09-18 21:00:00	Axilla/Groin	F36	PID01192	SRR27645452	SAMN39504716	Clade3	11	3.A.11.A
NV01511	2023-01-15 21:00:00	Skin Swab	F15	PID01193	SRR23920750	SAMN33829972	Clade3	4	3.A.4.G
NV01512	2023-01-25 21:00:00	Wound	F15	PID01193	SRR23920751	SAMN33829971	Clade3	4	3.A.4.G
NV01513	2023-02-01 21:00:00	Wound	F15	PID01193	SRR23920706	SAMN33829969	Clade3	4	3.A.4.G
NV01514	2023-01-10 21:00:00	Axilla/Groin	F39	PID01193	SRR23920726	SAMN33829885	Clade3	4	3.A.4.G
NV01515	2023-01-10 21:00:00	Blood	F41	PID01193	SRR23920725	SAMN33829884	Clade3	4	3.A.4.G	0.25	0.25	0.06	256	0.12	0.25	0.25	0.06	2
NV01516	2023-01-15 21:00:00	Skin Swab	F41	PID01193	SRR23920719	SAMN33829878	Clade3	4	3.A.4.G	0.5	0.12	0.06	256	0.12	0.25	0.12	0.06	2
NV01517	2023-11-27 21:00:00	Axilla/Groin	F36	PID01196	SRR27718885	SAMN39600281	Clade1	9	1.A.9.A											ERG11: Lys143Arg		B9J08_000401: Gln142*
NV01518	2024-02-04 21:00:00	Axilla/Groin	F36	PID01197	SRR29280616	SAMN41409340	Clade3	8	3.A.8.C
NV01519	2022-10-04 21:00:00	Skin Swab	F40	PID01198	SRR23108820	SAMN32670086	Clade3	7	3.A.7.D
NV01520	2022-08-08 21:00:00	Urine	F36	PID01198	SRR23109206	SAMN32670326	Clade3	7	3.A.7.D	0.5	0.06	0.03	128	0.06	0.06	0.06	0.03	1
NV01521	2024-01-30 21:00:00	Wound	F36	PID01199	SRR29363974	SAMN41409313	Clade3	13	3.A.13.M
NV01522	2024-06-16 21:00:00	Axilla/Groin	F36	PID01200	SRR33370070	SAMN48199644	Clade3	10	3.A.10.A
NV01523	2023-09-05 21:00:00	Axilla/Groin	F36	PID01201	SRR27130909	SAMN38336681	Clade3	5	3.A.5.E
NV01524	2022-11-30 21:00:00	Trachea	F36	PID01202	SRR23137786	SAMN32797893	Clade1	3	1.A.3.C	0.25	1	0.5	256	0.5	0.5	0.5	0.25	2		ERG11: Lys143Arg		B9J08_000401: Gln142*
NV01525	2022-11-16 21:00:00	Axilla/Groin	F12	PID01203	SRR23137823	SAMN32797928	Clade3	1	3.A.1.D
NV01526	2023-03-01 21:00:00	Blood	F36	PID01203	SRR27636383	SAMN35641069	Clade3	1	3.A.1.D	0.5	0.5	0.25	256	0.06	0.25	0.12	0.25	2
NV01527	2023-05-30 21:00:00	Axilla/Groin	F36	PID01203	SRR27135717	SAMN38336475	Clade3	1	3.A.1.D
NV01528	2023-11-11 21:00:00	Axilla/Groin	F36	PID01203	SRR27645225	SAMN39504661	Clade3	1	3.A.1.D
NV01529	2023-11-11 21:00:00	Urine	F36	PID01203	SRR27645221	SAMN39504681	Clade3	1	3.A.1.D
NV01530	2023-11-12 21:00:00	Trachea	F36	PID01203	SRR27607940	SAMN39273758	Clade3	1	3.A.1.D
NV01531	2023-11-13 21:00:00	Skin Swab	F36	PID01203	SRR27607934	SAMN39273752	Clade3	1	3.A.1.D
NV01532	2023-02-01 21:00:00	Axilla/Groin	F14	PID01203	SRR23920759	SAMN33829984	Clade3	1	3.A.1.D
NV01533	2023-06-27 21:00:00	Axilla/Groin	F12	PID01204	SRR27130946	SAMN38336611	Clade3	7	3.A.7.B
NV01534	2023-11-15 21:00:00	Axilla/Groin	F36	PID01204	SRR27645362	SAMN39504597	Clade1	11	1.A.11.A											ERG11: Lys143Arg
NV01535	2023-02-27 21:00:00	Axilla/Groin	F33	PID01205	SRR27636417	SAMN35641103	Clade3	8	3.A.8.C
NV01536	2023-03-10 21:00:00	Axilla/Groin	F33	PID01205	SRR27636494	SAMN35641051	Clade3	5	3.A.5.E
NV01537	2022-09-11 21:00:00	Skin Swab	F36	PID01207	SRR23108998	SAMN32670172	Clade3	4	3.A.4.K	0.5	0.25	0.06	256	0.12	0.25		0.06	2
NV01538	2022-07-12 21:00:00	Skin Swab	F36	PID01207	SRR23109069	SAMN32670275	Clade3	4	3.A.4.P	0.5	0.5	0.25	64	0.12	0.12		0.12	2
NV01539	2022-09-26 21:00:00	Blood	F36	PID01207	SRR23108870	SAMN32670104	Clade3	4	3.A.4.M	1	1	0.5	256	0.12	0.5	0.25	0.25	2
NV01540	2022-11-13 21:00:00	Wound	F36	PID01207	SRR23137831	SAMN32797936	Clade3	4	3.A.4.M	0.5	0.5	0.12	>256	0.5	0.5	0.25	0.25	2
NV01541	2022-11-13 21:00:00	Blood	F36	PID01207	SRR23108794	SAMN32669964	Clade3	4	3.A.4.M	0.5	1	0.25	>256	0.25	0.5	0.5	0.25	4
NV01542	2022-11-22 21:00:00	Trachea	F36	PID01207	SRR23137810	SAMN32797915	Clade3	4	3.A.4.M	0.5	1	0.5	>256	0.5	1	0.5	0.25	4
NV01543	2024-05-17 21:00:00	Axilla/Groin	F13	PID01208	SRR30946499	SAMN44245651	Clade3	12	3.A.12.D
NV01544	2024-04-20 21:00:00	Urine	F39	PID01209	SRR30866627	SAMN43829897	Clade1	2	1.A.2.E	0.25	0.5		64	0.12	0.25	0.12	0.12	0.5		ERG11: Lys143Arg		B9J08_000401: Gln142*
NV01545	2022-07-27 21:00:00	Blood	F41	PID01210	SRR23958477	SAMN30468051	Clade1	1	1.A.1.B	0.06	0.12	0.06	256	0.06	0.25	0.06	0.12	1		ERG11: Lys143Arg		B9J08_000401: Gln142*
NV01546	2024-06-23 21:00:00	Axilla/Groin	F36	PID01211	SRR33370024	SAMN48199598	Clade3	13	3.A.13.L
NV01547	2023-06-25 21:00:00	Axilla/Groin	F33	PID01212	SRR26968296	SAMN38335000	Clade1	3	1.A.3.E											ERG11: Lys143Arg		B9J08_000401: Gln142*
NV01548	2024-03-26 21:00:00	Axilla/Groin	F13	PID01213	SRR30847379	SAMN43830121	Clade3	13	3.A.13.M
NV01549	2024-03-03 21:00:00	Axilla/Groin	F36	PID01213	SRR29278645	SAMN41409512	Clade1	1	1.B.1.A											ERG11: Tyr132Phe
NV01550	2024-03-03 21:00:00	Axilla/Groin	F36	PID01213	SRR29278644	SAMN41409513	Clade3	13	3.A.13.M
NV01551	2024-03-03 21:00:00	Wound	F36	PID01213	SRR30844121	SAMN43817370	Clade1	1	1.B.1.A	0.5	0.25		128	0.12	0.25	0.25	0.12	1		ERG11: Tyr132Phe
NV01552	2024-03-06 21:00:00	Tissue	F36	PID01213	SRR30865491	SAMN43829939	Clade1	1	1.B.1.A											ERG11: Tyr132Phe
NV01553	2024-03-06 21:00:00	Tissue	F36	PID01213	SRR30946213	SAMN44245329	Clade1	1	1.B.1.A	1	0.03		128	0.03	0.12	0.03	0.03	0.5		ERG11: Tyr132Phe
NV01554	2021-12-25	Blood	F39	PID03435	SRR19738675	SAMN29101389	Clade3	4	3.A.4.E	0.5	0.25	0.12	64	0.12	0.12		0.06	0.5
NV01555	2023-10-12 21:00:00	Axilla/Groin	F36	PID01214	SRR27607927	SAMN39273873	Clade1	11	1.A.11.C											ERG11: Lys143Arg		B9J08_000401: Gln142*
NV01556	2024-04-15 21:00:00	Axilla/Groin	F33	PID01215	SRR30865519	SAMN43829967	Clade3	12	3.A.12.C
NV01557	2023-07-13 21:00:00	Blood	F36	PID01215	SRR27135785	SAMN38336283	Clade3	12	3.A.12.C	0.25	0.5	0.25	>256	0.25	1		0.25	4
NV01558	2023-11-30 21:00:00	Wound	F36	PID01215	SRR27645286	SAMN39504671	Clade3	12	3.A.12.C	0.5	0.5		256	0.25	0.5	0.5	0.12	4
NV01559	2024-04-19 21:00:00	Wound	F39	PID01215	SRR30865460	SAMN43829908	Clade3	12	3.A.12.C	0.5	0.25		>256	0.25	0.25	0.12	0.06	2
NV01560	2024-07-29 21:00:00	Tissue	F39	PID01215	SRR33391959	SAMN48270078	Clade3	12	3.A.12.C	0.25	0.12		32	0.06	0.12	0.12	0.12	0.5
NV01561	2024-09-25	Wound	F36	PID03533	SRR33403285	SAMN48286673	Clade1	2	1.B.2.A	0.5	0.12		32	0.015	0.06	0.12	0.03	0.25		ERG11: Tyr132Phe
NV01562	2022-11-22 21:00:00	Tissue	F36	PID01218	SRR23137772	SAMN32797879	Clade1	2	1.A.2.F	0.25	0.5	0.5	>256	1	0.5	0.25	0.25	4		ERG11: Lys143Arg		B9J08_000401: Gln142*
NV01563	2023-12-17 21:00:00	Skin Swab	F36	PID01220	SRR28069386	SAMN40079077	Clade3	13	3.A.13.D	0.5	0.5		>256	0.25	0.5	0.25	0.25	2			FUR1: Val103Gly
NV01564	2023-05-23 21:00:00	Axilla/Groin	F28	PID01219	SRR27135732	SAMN38336395	Clade3	11	3.A.11.J
NV01565	2023-05-09 21:00:00	Axilla/Groin	F12	PID01219	SRR27131019	SAMN38336616	Clade3	11	3.A.11.J
NV01566	2024-06-10 21:00:00	Axilla/Groin	F36	PID01221	SRR30946927	SAMN44246112	Clade3	13	3.A.13.L
NV01567	2022-12-13 21:00:00	Skin Swab	F40	PID01222	SRR23137754	SAMN32797861	Clade3	4	3.A.4.B
NV01569	2023-11-27 21:00:00	Axilla/Groin	F12	PID01224	SRR27718886	SAMN39600222	Clade3	1	3.A.1.A
NV01570	2023-12-12 21:00:00	Blood	F39	PID01224	SRR27718927	SAMN39600221	Clade3	1	3.A.1.B	0.5	0.25		128	0.12	0.25	0.12	0.12	1
NV01571	2023-12-11 21:00:00	Urine	F39	PID01224	SRR27718923	SAMN39600220	Clade3	1	3.A.1.B	1	0.25		>256	0.06	0.12	0.25	0.12	1
NV01572	2023-12-30 21:00:00	Catheter Tip	F39	PID01224	SRR29364652	SAMN41409105	Clade3	1	3.A.1.B	0.25	0.25		>256	0.12	0.25	0.12	0.06	2
NV01573	2023-12-12 21:00:00	Blood	F39	PID01224	SRR28069406	SAMN40079097	Clade3	1	3.A.1.B	1	0.12		128	0.12	0.25	0.12	0.12	2
NV01574	2024-01-29 21:00:00	Axilla/Groin	F36	PID01225	SRR29363957	SAMN41409310	Clade1	3	1.A.3.C											ERG11: Lys143Arg		B9J08_000401: Gln142*
NV01575	2022-06-08 21:00:00	Axilla/Groin	F18	PID01226	SRR20081640	SAMN29634993	Clade3	3	3.A.3.D
NV01576	2023-08-06 21:00:00	Axilla/Groin	F07	PID01228	SRR27135673	SAMN38336248	Clade3	4	3.A.4.F
NV01577	2024-03-28 21:00:00	Axilla/Groin	F12	PID01230	SRR30865551	SAMN43829999	Clade3	3	3.A.3.K
NV01578	2022-10-25 21:00:00	Axilla/Groin	F37	PID01231	SRR23108767	SAMN32670014	Clade3	7	3.A.7.A
NV01579	2024-02-10 21:00:00	Axilla/Groin	F12	PID01232	SRR29280559	SAMN41409384	Clade1	11	1.A.11.C											ERG11: Lys143Arg		B9J08_000401: Gln142*
NV01580	2022-07-26 21:00:00	Wound	F36	PID01235	SRR23109119	SAMN32670357	Clade3	9	3.A.9.A	0.5	0.06	0.06	128	0.06	0.5	0.25	0.25	2
NV01581	2022-12-07 21:00:00	Axilla/Groin	F33	PID01236	SRR23249027	SAMN32934656	Clade3	3	3.A.3.B
NV01582	2023-10-23 21:00:00	Axilla/Groin	F36	PID01238	SRR27607869	SAMN39273836	Clade1	3	1.B.3.A
NV01583	2023-02-17 21:00:00	Axilla/Groin	F12	PID01239	SRR27636512	SAMN35641133	Clade3	4	3.A.4.J
NV01584	2023-04-10 21:00:00	Axilla/Groin	F25	PID01240	SRR27636318	SAMN35640850	Clade3	8	3.A.8.D
NV01585	2024-05-07 21:00:00	Axilla/Groin	F36	PID01242	SRR30867963	SAMN43829764	Clade3	4	3.A.4.J
NV01586	2023-01-09 21:00:00	Catheter Tip	F36	PID01241	SRR23248973	SAMN32934602	Clade3	2	3.A.2.D	0.25	0.12	0.06	256	0.12	0.12	0.12	0.06	2
NV01587	2023-02-03 21:00:00	Blood	F36	PID01241	SRR27636521	SAMN35641142	Clade3	2	3.A.2.D	0.5	1	0.25	256	0.25	0.5	0.5	0.25	4
NV01588	2022-12-13 21:00:00	Skin Swab	F40	PID01244	SRR23137764	SAMN32797871	Clade3	6	3.A.6.C
NV01589	2023-03-20 21:00:00	Axilla/Groin	F28	PID01246	SRR27636353	SAMN35641005	Clade1	3	1.B.3.A											ERG11: Tyr132Phe
NV01590	2023-03-10 21:00:00	Urine	F38	PID01247	SRR27636481	SAMN35641038	Clade3	5	3.A.5.E	1	0.12	0.12	128	0.12	0.25	0.06	0.12	2
NV01591	2023-03-15 21:00:00	Catheter Tip	F38	PID01247	SRR27636369	SAMN35641022	Clade3	5	3.A.5.E	1	0.5	0.25	256	0.25	0.5	0.5	0.25	2
NV01592	2023-11-14 21:00:00	Skin Swab	F38	PID01247	SRR27607889	SAMN39273739	Clade3	5	3.A.5.E
NV01593	2024-03-22 21:00:00	Blood	F38	PID01247	SRR30844574	SAMN43817349	Clade3	5	3.A.5.E	0.5	0.25		>256	0.12	0.5	0.12	0.12	1
NV01594	2023-04-03 21:00:00	Urine	F39	PID01247	SRR27135967	SAMN38336577	Clade3	5	3.A.5.E
NV01595	2024-09-24	Urine	F36	PID01247	SRR33403286	SAMN48286674	Clade3	5	3.A.5.E	0.5	0.5		256	0.25	0.5	0.25	0.25	1
NV01596	2023-04-05 21:00:00	Axilla/Groin	F39	PID01247	SRR27636254	SAMN35640987	Clade3	5	3.A.5.E
NV01597	2024-02-21 21:00:00	Axilla/Groin	F39	PID01249	SRR30868024	SAMN43829825	Clade1	12	1.A.12.C											ERG11: Lys143Arg	FUR1: Arg101Leu	B9J08_000401: Gln142*
NV01598	2024-03-16 21:00:00	Urine	F39	PID01249	SRR30868023	SAMN43829824	Clade1	12	1.A.12.C	0.5	0.25		>256	0.5	0.5	0.12	0.25	1		ERG11: Lys143Arg	FUR1: Arg101Leu	B9J08_000401: Gln142*
NV01599	2024-03-26 21:00:00	Skin Swab	F39	PID01249	SRR30847347	SAMN43830089	Clade1	12	1.A.12.C	0.5	0.5		>256	1	1	0.25	0.25	4		ERG11: Lys143Arg	FUR1: Arg101Leu	B9J08_000401: Gln142*
NV01600	2024-03-26 21:00:00	Wound	F39	PID01249	SRR30868022	SAMN43829823	Clade1	12	1.A.12.C	0.5	0.12		>256	0.5	0.25	0.12	0.25	1		ERG11: Lys143Arg	FUR1: Arg101Leu	B9J08_000401: Gln142*
NV01601	2024-04-18 21:00:00	Urine	F39	PID01249	SRR30868007	SAMN43829808	Clade1	12	1.A.12.C	0.5	4		>256	0.5	0.5	4	0.5	2	FKS1: Ser639Phe	ERG11: Lys143Arg	FUR1: Arg101Leu	B9J08_000401: Gln142*
NV01602	2024-05-05 21:00:00	Wound	F39	PID01249	SRR30866565	SAMN43829835	Clade1	12	1.A.12.C	0.5	0.5		>256	0.5	0.5	0.25	0.5	2		ERG11: Lys143Arg	FUR1: Arg101Leu	B9J08_000401: Gln142*
NV01603	2024-05-05 21:00:00	Blood	F39	PID01249	SRR30945903	SAMN44244899	Clade1	12	1.A.12.C	0.5	0.5		256	0.5	0.5	0.12	0.25	2		ERG11: Lys143Arg	FUR1: Arg101Leu	B9J08_000401: Gln142*
NV01604	2024-06-07 21:00:00	Blood	F39	PID01249	SRR33370020	SAMN48199594	Clade1	12	1.A.12.C	0.25	1		>256	2	2	0.5	1	4		ERG11: Lys143Arg	FUR1: Arg101Leu	B9J08_000401: Gln142*
NV01605	2024-06-09 21:00:00	Wound	F39	PID01249	SRR33370019	SAMN48199593	Clade1	12	1.A.12.C	2	8		>256	0.5	2	8	1	2	FKS1: Ser639Phe	ERG11: Lys143Arg	FUR1: Arg101Leu
NV01606	2024-04-28 21:00:00	Axilla/Groin	F36	PID01248	SRR30866597	SAMN43829867	Clade1	5	1.B.5.A											ERG11: Tyr132Phe
NV01607	2023-05-29 21:00:00	Axilla/Groin	F29	PID01250	SRR27135713	SAMN38336457	Clade3	9	3.A.9.A
NV01608	2021-12-13	Axilla/Groin	F36	PID03432	SRR19738685	SAMN29101398	Clade3	5	3.A.5.E
NV01609	2023-06-10 21:00:00	Blood	F36	PID01251	SRR27135801	SAMN38336249	Clade3	8	3.A.8.D	0.5	0.25	0.06	256	0.12	0.25		0.06	2
NV01610	2024-06-23 21:00:00	Axilla/Groin	F36	PID01252	SRR33370032	SAMN48199606	Clade1	13	1.A.13.A											ERG11: Lys143Arg		B9J08_000401: Gln142*
NV01611	2022-05-08 21:00:00	Axilla/Groin	F14	PID03388	SRR23958491	SAMN30468065	Clade3	13	3.A.13.B
NV01612	2024-04-18 21:00:00	Axilla/Groin	F29	PID01254	SRR30945886	SAMN44244882	Clade1	5	1.B.5.A											ERG11: Tyr132Phe
NV01613	2024-03-16 21:00:00	Axilla/Groin	F36	PID01255	SRR30846302	SAMN43817219	Clade1	4	1.B.4.A											ERG11: Tyr132Phe
NV01614	2024-09-18	Urine	F36	PID01256	SRR33403351	SAMN48286709	Clade3	13	3.A.13.M	0.5	0.25		128	0.12	0.25	0.12	0.12	0.5
NV01615	2024-03-21 21:00:00	Axilla/Groin	F12	PID01258	SRR30847382	SAMN43830124	Clade1	12	1.A.12.C											ERG11: Lys143Arg	FUR1: Arg101Leu	B9J08_000401: Gln142*
NV01616	2023-06-07 21:00:00	Wound	F36	PID01259	SRR27135926	SAMN38336478	Clade3	3	3.A.3.C	1	0.12		256	0.12	0.25	0.06	0.12	2
NV01617	2023-03-06 21:00:00	Blood	F38	PID01260	SRR27636480	SAMN35641037	Clade3	13	3.A.13.F	1	0.5	0.25	128	0.25	0.5	0.25	0.25	2
NV01618	2023-05-22 21:00:00	Axilla/Groin	F33	PID01262	SRR27131007	SAMN38336674	Clade3	5	3.A.5.E
NV01619	2024-03-13 21:00:00	Axilla/Groin	F02	PID01264	SRR30846322	SAMN43817239	Clade1	2	1.A.2.H											ERG11: Lys143Arg		B9J08_000401: Gln142*
NV01620	2024-08-21 21:00:00	Wound	F36	PID01265	SRR33392008	SAMN48270038	Clade3	5	3.A.5.D	0.5	0.25		256	0.12	0.25	0.12	0.06	1
NV01621	2023-01-14 21:00:00	Axilla/Groin	F02	PID01266	SRR23920773	SAMN33829997	Clade3	5	3.A.5.E
NV01622	2023-04-29 21:00:00	Skin Swab	F39	PID01266	SRR27636286	SAMN35640873	Clade3	2	3.A.2.D	0.5	0.5	0.12	>256	0.25	0.5	0.25	0.12	2
NV01623	2024-04-13 21:00:00	Axilla/Groin	F23	PID01267	SRR30865525	SAMN43829973	Clade3	3	3.A.3.K
NV01624	2024-03-15 21:00:00	Axilla/Groin	F39	PID01267	SRR30847451	SAMN43830176	Clade3	3	3.A.3.K
NV01625	2024-06-20 21:00:00	Axilla/Groin	F33	PID01268	SRR33370047	SAMN48199621	Clade1	8	1.A.8.A											ERG11: Lys143Arg		B9J08_000401: Gln142*
NV01626	2022-09-01 21:00:00	Skin Swab	F40	PID01271	SRR23248990	SAMN32934619	Clade3	8	3.A.8.E
NV01627	2022-08-17 21:00:00	Axilla/Groin	F17	PID01271	SRR23109099	SAMN32670305	Clade3	8	3.A.8.E
NV01628	2024-08-15 21:00:00	Wound	F36	PID01273	SRR33392012	SAMN48270042	Clade3	12	3.A.12.E	0.5	0.25		>256	0.25	0.5	0.12	0.12	2
NV01629	2024-07-23 21:00:00	Ulcer	F39	PID01273	SRR33392057	SAMN48270144	Clade3	12	3.A.12.E	0.5	0.06		64	0.06	0.12	0.06	0.06	0.5
NV01630	2024-09-08	Wound	F39	PID01273	SRR33403347	SAMN48286705	Clade3	12	3.A.12.E	0.25	0.25		128	0.12	0.25	0.12	0.12	0.5
NV01631	2023-11-16 21:00:00	Skin Swab	F36	PID01275	SRR27645346	SAMN39504642	Clade3	4	3.A.4.H
NV01632	2024-05-02 21:00:00	Axilla/Groin	F36	PID01278	SRR30866570	SAMN43829840	Clade3	12	3.A.12.F
NV01633	2024-05-02 21:00:00	Wound	F36	PID01278	SRR30867957	SAMN43829758	Clade3	12	3.A.12.F	0.5	0.12		128	0.06	0.25	0.06	0.06	0.25
NV01634	2024-04-08 21:00:00	Wound	F36	PID01277	SRR30865496	SAMN43829944	Clade3	11	3.A.11.I	0.5	0.5		>256	0.25	0.5	0.5	0.12	2
NV01635	2024-05-27 21:00:00	Wound	F36	PID01277	SRR30946391	SAMN44245420	Clade3	11	3.A.11.I	0.5	1		>256	0.12	0.5	0.5	0.12	2
NV01636	2024-06-25 21:00:00	Axilla/Groin	F36	PID01277	SRR33369975	SAMN48199562	Clade3	11	3.A.11.I
NV01637	2024-06-30 21:00:00	Axilla/Groin	F36	PID01277	SRR33381069	SAMN48209801	Clade3	11	3.A.11.I
NV01638	2024-07-15 21:00:00	Axilla/Groin	F36	PID01280	SRR33388588	SAMN48265031	Clade3	4	3.A.4.J
NV01639	2022-04-24 21:00:00	Skin	F31	PID01281	SRR19664608	SAMN29096892	Clade3	13	3.A.13.B	0.5	0.5	0.25	128	0.12	0.25	0.25	0.12	1
NV01640	2023-03-11 21:00:00	Axilla/Groin	F28	PID01282	SRR27636485	SAMN35641042	Clade3	6	3.A.6.B
NV01641	2024-04-05 21:00:00	Axilla/Groin	F10	PID01283	SRR30865543	SAMN43829991	Clade1	13	1.A.13.E											ERG11: Lys143Arg		B9J08_000401: Gln142*
NV01642	2024-03-13 21:00:00	Axilla/Groin	F30	PID01283	SRR30846320	SAMN43817237	Clade1	13	1.A.13.E											ERG11: Lys143Arg		B9J08_000401: Gln142*
NV01643	2023-12-18 21:00:00	Axilla/Groin	F12	PID01284	SRR28069426	SAMN40079056	Clade3	2	3.A.2.A
NV01644	2023-08-05 21:00:00	Axilla/Groin	F36	PID01285	SRR27135681	SAMN38336586	Clade3	13	3.A.13.K
NV01645	2023-01-10 21:00:00	Urine	F36	PID01286	SRR23920676	SAMN33829939	Clade3	5	3.A.5.E	0.25	0.5	0.25	256	0.25	0.5	0.5	0.25	2
NV01646	2023-02-12 21:00:00	Urine	F36	PID01286	SRR27636519	SAMN35641140	Clade3	13	3.A.13.H	0.5	4	2	256	0.12	0.12	4	0.12	1	FKS1: Ser639Phe
NV01647	2023-05-07 21:00:00	Skin Swab	F36	PID01286	SRR27131017	SAMN38336610	Clade3	13	3.A.13.H	0.5	0.25	0.12	>256	0.12	0.5	0.12	0.12	2
NV01648	2024-04-28 21:00:00	Axilla/Groin	F36	PID01287	SRR30866608	SAMN43829878	Clade1	2	1.A.2.F											ERG11: Lys143Arg		B9J08_000401: Gln142*
NV01649	2024-06-07 21:00:00	Axilla/Groin	F36	PID01291	SRR30946944	SAMN44246129	Clade1	1	1.B.1.A											ERG11: Tyr132Phe
NV01650	2024-06-09 21:00:00	Axilla/Groin	F36	PID01291	SRR30946929	SAMN44246114	Clade1	1	1.B.1.A											ERG11: Tyr132Phe
NV01651	2024-06-09 21:00:00	Axilla/Groin	F36	PID01291	SRR30946928	SAMN44246113	Clade3	4	3.A.4.L
NV01652	2024-01-30 21:00:00	Axilla/Groin	F29	PID01293	SRR30846275	SAMN43830228	Clade3	13	3.A.13.G
NV01653	2023-10-21 21:00:00	Axilla/Groin	F36	PID01294	SRR27607903	SAMN39273849	Clade3	4	3.A.4.B
NV01654	2023-10-21 21:00:00	Skin Swab	F36	PID01294	SRR27607855	SAMN39273822	Clade1	13	1.A.13.D	0.25	0.25		>256	1	1	0.25	5	2		ERG11: Lys143Arg	FUR1: Gln16*	B9J08_000401: Gln142*
NV01655	2023-11-19 21:00:00	Axilla/Groin	F36	PID01294	SRR27645348	SAMN39504606	Clade1	13	1.A.13.D											ERG11: Lys143Arg	FUR1: Gln16*	B9J08_000401: Gln142*
NV01656	2023-11-22 21:00:00	Skin Swab	F36	PID01294	SRR27718894	SAMN39600308	Clade1	13	1.A.13.D											ERG11: Lys143Arg	FUR1: Gln16*	B9J08_000401: Gln142*
NV01657	2024-04-04 21:00:00	Axilla/Groin	F36	PID01296	SRR30844557	SAMN43817332	Clade3	5	3.A.5.F
NV01658	2023-07-03	Bronchial Washing	F36	PID01297	SRR27130934	SAMN38336683	Clade3	11	3.A.11.F	0.25	0.5	0.12	256	0.12	0.25	0.12	0.12	1
NV01659	2023-05-04 21:00:00	Sputum	F36	PID01297	SRR27636241	SAMN35640906	Clade3	11	3.A.11.E	1	0.25	0.25	>256	0.12	0.5		0.25	4
NV01660	2024-04-18 21:00:00	Urine	F39	PID01298	SRR30865459	SAMN43829907	Clade1	13	1.A.13.A	0.5	0.5		>256	1	1	0.25	0.5	2		ERG11: Lys143Arg		B9J08_000401: Gln142*
NV01661	2024-06-03 21:00:00	Axilla/Groin	F36	PID01299	SRR30946393	SAMN44245422	Clade3	4	3.A.4.J
NV01662	2024-06-13 21:00:00	Axilla/Groin	F36	PID01299	SRR30944798	SAMN44243794	Clade3	4	3.A.4.J
NV01663	2024-07-10 21:00:00	Axilla/Groin	F36	PID01299	SRR33381093	SAMN48209725	Clade3	4	3.A.4.J
NV01664	2024-07-11 21:00:00	Blood	F36	PID01299	SRR33388486	SAMN48264961	Clade3	4	3.A.4.J	0.5	0.12		128	0.06	0.12	0.06	0.06	0.5
NV01665	2024-07-11 21:00:00	Blood	F36	PID01299	SRR33392059	SAMN48270146	Clade3	4	3.A.4.J	0.5	0.12		256	0.25	0.5	0.12	0.25	1
NV01666	2024-07-30 21:00:00	Wound	F36	PID01299	SRR33391972	SAMN48270091	Clade3	4	3.A.4.J	2	0.5		128	0.25	0.25	1	0.25	1
NV01667	2024-09-01 21:00:00	Blood	F36	PID01299	SRR33403367	SAMN48286725	Clade3	4	3.A.4.J	0.5	0.5		>256	0.25	0.5	0.12	0.12	2
NV01668	2023-02-21 21:00:00	Axilla/Groin	F39	PID01299	SRR27636499	SAMN35641121	Clade3	4	3.A.4.J
NV01669	2023-04-21 21:00:00	Axilla/Groin	F39	PID01299	SRR27636437	SAMN35640876	Clade3	4	3.A.4.J
NV01670	2023-05-07 21:00:00	Axilla/Groin	F39	PID01299	SRR27636276	SAMN35640878	Clade3	4	3.A.4.J
NV01671	2023-05-23 21:00:00	Blood	F39	PID01299	SRR27135726	SAMN38336447	Clade3	4	3.A.4.J	1	1	1	>256	1	0.5	2	0.25	8
NV01672	2023-06-21 21:00:00	Axilla/Groin	F39	PID01299	SRR27135793	SAMN38336405	Clade3	4	3.A.4.J
NV01673	2023-09-16 21:00:00	Axilla/Groin	F39	PID01299	SRR27645472	SAMN39504718	Clade3	4	3.A.4.J
NV01674	2024-01-20 21:00:00	Urine	F39	PID01299	SRR29364001	SAMN41409239	Clade1	2	1.A.2.B	0.5	0.25		>256	0.12	0.25	0.06	0.06	8		ERG11: Lys143Arg		B9J08_000401: Gln142*
NV01675	2024-03-10 21:00:00	Axilla/Groin	F12	PID01300	SRR30846330	SAMN43817247	Clade1	3	1.B.3.A											ERG11: Tyr132Phe
NV01676	2024-03-10 21:00:00	Axilla/Groin	F12	PID01300	SRR30846329	SAMN43817246	Clade3	10	3.A.10.E
NV01677	2023-11-21 21:00:00	Axilla/Groin	F29	PID01300	SRR27645352	SAMN39504648	Clade3	4	3.A.4.H
NV01678	2023-11-11 21:00:00	Axilla/Groin	F36	PID01301	SRR27645367	SAMN39504623	Clade1	5	1.B.5.A											ERG11: Tyr132Phe
NV01679	2023-10-19 21:00:00	Axilla/Groin	F29	PID01303	SRR27607871	SAMN39273838	Clade1	3	1.B.3.A											ERG11: Tyr132Phe
NV01680	2024-04-15 21:00:00	Axilla/Groin	F33	PID01304	SRR30847422	SAMN43830019	Clade3	6	3.A.6.A
NV01681	2024-04-14 21:00:00	Axilla/Groin	F33	PID01304	SRR30847421	SAMN43830018	Clade3	6	3.A.6.A
NV01682	2024-04-10 21:00:00	Axilla/Groin	F36	PID01305	SRR30865539	SAMN43829987	Clade3	11	3.A.11.J
NV01683	2024-04-10 21:00:00	Wound	F36	PID01305	SRR30865499	SAMN43829947	Clade1	1	1.B.1.A	0.5	0.5		>256	1	1	0.25	0.25	4		ERG11: Tyr132Phe
NV01684	2024-04-10 21:00:00	Wound	F36	PID01305	SRR30865498	SAMN43829946	Clade1	4	1.A.4.E	0.5	0.5		>256	1	1	0.25	0.25	4		ERG11: Lys143Arg		B9J08_000401: Gln142*
NV01685	2024-01-06 21:00:00	Axilla/Groin	F12	PID01306	SRR29364620	SAMN41409131	Clade1	13	1.A.13.B											ERG11: Lys143Arg		B9J08_000401: Gln142*
NV01686	2023-12-17 21:00:00	Axilla/Groin	F36	PID01306	SRR28069409	SAMN40079100	Clade3	10	3.A.10.B
NV01687	2023-12-20 21:00:00	Skin Swab	F36	PID01306	SRR28069389	SAMN40079080	Clade3	10	3.A.10.B	1	0.5		>256	0.25	0.5	0.25	0.12	2
NV01688	2023-12-17 21:00:00	Skin Swab	F36	PID01306	SRR28069387	SAMN40079078	Clade3	10	3.A.10.B	0.5	0.25		256	0.06	0.25	0.12	0.06	4
NV01689	2023-12-17 21:00:00	Skin Swab	F36	PID01306	SRR28069385	SAMN40079076	Clade3	10	3.A.10.B	1	0.25		256	0.12	0.25	0.12	0.06	2
NV01690	2024-05-09 21:00:00	Axilla/Groin	F36	PID01306	SRR30945910	SAMN44244906	Clade1	3	1.A.3.C											ERG11: Lys143Arg		B9J08_000401: Gln142*
NV01691	2024-05-07 21:00:00	Wound	F36	PID01306	SRR30946266	SAMN44245368	Clade1	3	1.A.3.C	0.25	0.5		256	0.5	0.5	0.25	0.25	1		ERG11: Lys143Arg		B9J08_000401: Gln142*
NV01692	2022-11-21 21:00:00	Axilla/Groin	F06	PID01307	SRR23137819	SAMN32797924	Clade3	5	3.A.5.E
NV01693	2024-02-23 21:00:00	Axilla/Groin	F33	PID01310	SRR29280454	SAMN41409465	Clade3	4	3.A.4.F
NV01694	2024-02-15 21:00:00	Axilla/Groin	F30	PID01310	SRR29280548	SAMN41409417	Clade3	4	3.A.4.F
NV01695	2022-11-16 21:00:00	Axilla/Groin	F14	PID01311	SRR23137828	SAMN32797933	Clade3	3	3.A.3.H
NV01696	2024-03-13 21:00:00	Axilla/Groin	F13	PID01313	SRR30847443	SAMN43830168	Clade3	13	3.A.13.D												FUR1: Val103Gly
NV01697	2023-12-25 21:00:00	Axilla/Groin	F36	PID01315	SRR28069417	SAMN40079047	Clade3	4	3.A.4.F
NV01698	2023-06-14 21:00:00	Axilla/Groin	F23	PID01316	SRR27135813	SAMN38336453	Clade3	11	3.A.11.G
NV01699	2024-09-15	Wound	F39	PID03534	SRR33403345	SAMN48286703	Clade1	2	1.A.2.F	0.25	0.5		128	0.25	0.5	0.25	0.25	0.5		ERG11: Lys143Arg		B9J08_000401: Gln142*
NV01700	2024-04-21 21:00:00	Axilla/Groin	F36	PID01318	SRR30865474	SAMN43829922	Clade1	13	1.A.13.C										FKS1: Asp642Tyr	ERG11: Lys143Arg		B9J08_000401: Gln142*
NV01701	2024-05-22 21:00:00	Axilla/Groin	F36	PID01318	SRR30946487	SAMN44245639	Clade3	3	3.A.3.E
NV01703	2024-05-31 21:00:00	Axilla/Groin	F36	PID01318	SRR30946399	SAMN44245428	Clade1	13	1.A.13.C										FKS1: Asp642Tyr	ERG11: Lys143Arg		B9J08_000401: Gln142*
NV01704	2024-06-16 21:00:00	Axilla/Groin	F36	PID01318	SRR33370068	SAMN48199642	Clade3	3	3.A.3.E
NV01705	2024-06-16 21:00:00	Axilla/Groin	F36	PID01318	SRR33370069	SAMN48199643	Clade1	13	1.A.13.C										FKS1: Asp642Tyr	ERG11: Lys143Arg		B9J08_000401: Gln142*
NV01706	2023-10-09 21:00:00	Groin	F36	PID01320	SRR27645252	SAMN39504865	Clade3	12	3.A.12.E	0.5	0.5	0.25	>256	0.25	0.5	0.12	0.25	1
NV01708	2023-05-14 21:00:00	Wound	F36	PID01325	SRR27135842	SAMN38336764	Clade3	6	3.A.6.E
NV01709	2024-04-07 21:00:00	Axilla/Groin	F36	PID01325	SRR30847299	SAMN43830041	Clade1	2	1.B.2.A											ERG11: Tyr132Phe
NV01710	2023-06-28 21:00:00	Axilla/Groin	F23	PID01327	SRR27135897	SAMN38336564	Clade3	4	3.A.4.D
NV01711	2023-10-17 21:00:00	Axilla/Groin	F36	PID01328	SRR27607910	SAMN39273856	Clade3	12	3.A.12.D
NV01712	2024-01-23 21:00:00	Axilla/Groin	F33	PID01329	SRR29364008	SAMN41409258	Clade3	11	3.A.11.H
NV01713	2024-03-01 21:00:00	Axilla/Groin	F29	PID01330	SRR30846269	SAMN43830222	Clade3	4	3.A.4.F
NV01714	2024-01-28 21:00:00	Axilla/Groin	F36	PID01333	SRR29363963	SAMN41409296	Clade3	12	3.A.12.H
NV01715	2023-04-12 21:00:00	Blood	F39	PID01334	SRR27636456	SAMN35640919	Clade1	3	1.A.3.E											ERG11: Lys143Arg		B9J08_000401: Gln142*
NV01717	2022-09-06 21:00:00	Skin Swab	F40	PID01332	SRR23248987	SAMN32934616	Clade3	4	3.A.4.J
NV01718	2024-07-12 21:00:00	Axilla/Groin	F36	PID01323	SRR33388615	SAMN48265058	Clade3	13	3.A.13.D												FUR1: Val103Gly
NV01719	2024-06-14 21:00:00	Axilla/Groin	F36	PID01336	SRR33370003	SAMN48199549	Clade3	8	3.A.8.A
NV01720	2024-07-30 21:00:00	Axilla/Groin	F36	PID01336	SRR33392047	SAMN48270134	Clade3	8	3.A.8.A
NV01721	2022-12-26 21:00:00	Axilla/Groin	F12	PID01335	SRR23249007	SAMN32934636	Clade3	4	3.A.4.C
NV01722	2022-10-02 21:00:00	Axilla/Groin	F12	PID01337	SRR23108813	SAMN32670079	Clade3	4	3.A.4.K
NV01723	2024-10-04	Wound	F36	PID01338	SRR33403269	SAMN48286657	Clade3	5	3.A.5.C	0.5	0.5		64	0.12	0.25	0.25	0.12	1
NV01724	2022-06-25 21:00:00	Trachea	F31	PID01339	SRR23109137	SAMN32670375	Clade3	1	3.A.1.D	0.5	0.12	0.06	64	0.12	0.5		0.06	1
NV01725	2022-06-08 21:00:00	Axilla/Groin	F18	PID01340	SRR20081641	SAMN29634994	Clade3	3	3.A.3.D
NV01726	2023-01-19 21:00:00	Blood	F25	PID01341	SRR23920746	SAMN33829966	Clade3	7	3.A.7.E	0.5	0.5	0.25	256	0.25	0.5	0.5	0.25	2
NV01727	2023-11-20 21:00:00	Axilla/Groin	F36	PID01343	SRR27645308	SAMN39504599	Clade3	11	3.A.11.J
NV01728	2023-12-01 21:00:00	Axilla/Groin	F12	PID01344	SRR27718868	SAMN39600233	Clade3	11	3.A.11.J
NV01729	2023-11-12 21:00:00	Axilla/Groin	F36	PID01345	SRR27645224	SAMN39504587	Clade3	13	3.A.13.E
NV01730	2023-02-18 21:00:00	Axilla/Groin	F12	PID01346	SRR27636511	SAMN35641132	Clade1	11	1.A.11.A											ERG11: Lys143Arg		B9J08_000401: Gln142*
NV01731	2023-02-13 21:00:00	Axilla/Groin	F39	PID01346	SRR27636522	SAMN35641143	Clade1	11	1.A.11.A											ERG11: Lys143Arg		B9J08_000401: Gln142*
NV01732	2022-11-02 21:00:00	Axilla/Groin	F32	PID01348	SRR23137852	SAMN32797957	Clade3	4	3.A.4.C
NV01733	2022-09-14 21:00:00	Skin Swab	F40	PID01352	SRR23248999	SAMN32934628	Clade3	1	3.B.1.A
NV01734	2023-03-11 21:00:00	Axilla/Groin	F33	PID01349	SRR27636493	SAMN35641050	Clade3	4	3.A.4.G
NV01735	2023-03-12 21:00:00	Axilla/Groin	F33	PID01349	SRR27636483	SAMN35641040	Clade3	4	3.A.4.G
NV01736	2023-07-02 21:00:00	Axilla/Groin	F33	PID01349	SRR27135891	SAMN38336389	Clade3	4	3.A.4.G
NV01737	2022-06-15 21:00:00	Axilla/Groin	F12	PID01349	SRR23958461	SAMN30468035	Clade3	4	3.A.4.G
NV01738	2023-10-01 21:00:00	Axilla/Groin	F36	PID01350	SRR27607984	SAMN39273898	Clade1	11	1.A.11.B											ERG11: Lys143Arg		B9J08_000401: Gln142*
NV01739	2024-03-28 21:00:00	Axilla/Groin	F36	PID01353	SRR30847360	SAMN43830102	Clade3	3	3.A.3.C
NV01740	2024-04-20 21:00:00	Wound	F36	PID01353	SRR30865457	SAMN43829905	Clade3	3	3.A.3.C
NV01741	2024-04-28 21:00:00	Axilla/Groin	F36	PID01355	SRR30866596	SAMN43829866	Clade3	12	3.A.12.D
NV01742	2022-08-18 21:00:00	Skin Swab	F40	PID01356	SRR23137858	SAMN32797963	Clade3	8	3.A.8.A
NV01743	2024-03-07 21:00:00	Axilla/Groin	F36	PID01361	SRR30846351	SAMN43817261	Clade3	10	3.A.10.E
NV01744	2022-07-30 21:00:00	Skin	F25	PID01362	SRR23109223	SAMN32670343	Clade1	1	1.A.1.A	0.25	0.5	0.25	128	0.12	0.12	0.25	0.06	1		ERG11: Lys143Arg		B9J08_000401: Gln142*
NV01745	2023-04-28 21:00:00	Axilla/Groin	F33	PID01363	SRR27636292	SAMN35640872	Clade3	6	3.A.6.C
NV01746	2023-11-02 21:00:00	Axilla/Groin	F36	PID01365	SRR27607818	SAMN39273785	Clade1	13	1.A.13.C										FKS1: Asp642Tyr	ERG11: Lys143Arg		B9J08_000401: Gln142*
NV01747	2024-05-01 21:00:00	Blood	F39	PID01367	SRR30866562	SAMN43829832	Clade3	6	3.A.6.G	1	0.5		256	0.5	1	0.12	0.25	2
NV01748	2024-05-05 21:00:00	Blood	F39	PID01367	SRR30945905	SAMN44244901	Clade3	6	3.A.6.G	2	1		>256	0.5	0.5	0.5	0.25	4
NV01749	2024-05-27 21:00:00	Wound	F39	PID01367	SRR30946383	SAMN44245412	Clade3	6	3.A.6.G	1	1		>256	1	1	0.25	0.5	4
NV01750	2022-10-17 21:00:00	Axilla/Groin	F33	PID01368	SRR23108779	SAMN32670026	Clade3	4	3.A.4.N
NV01751	2021-11-30	Urine	F33	PID03413	SRR19738686	SAMN29101399	Clade1	4	1.A.4.B											ERG11: Lys143Arg		B9J08_000401: Gln142*
NV01752	2023-08-23 21:00:00	Axilla/Groin	F36	PID01370	SRR27135854	SAMN38336257	Clade1	13	1.A.13.C										FKS1: Asp642Tyr	ERG11: Lys143Arg	FUR1: Val83Asp	B9J08_000401: Gln142*
NV01753	2021-12-02	Axilla/Groin	F40	PID03385	SRR19738688	SAMN29101401	Clade1	2	1.A.2.I											ERG11: Lys143Arg		B9J08_000401: Gln142*
NV01754	2023-03-11 21:00:00	Axilla/Groin	F39	PID01372	SRR27636491	SAMN35641048	Clade3	2	3.A.2.D
NV01755	2023-12-19 21:00:00	Axilla/Groin	F12	PID01373	SRR28069423	SAMN40079053	Clade1	13	1.A.13.E											ERG11: Lys143Arg		B9J08_000401: Gln142*
NV01756	2022-09-06 21:00:00	Skin Swab	F40	PID01374	SRR23248986	SAMN32934615	Clade3	4	3.A.4.C
NV01757	2022-05-05 21:00:00	Axilla/Groin	F12	PID01374	SRR23958494	SAMN30468068	Clade3	4	3.A.4.C
NV01758	2024-01-14 21:00:00	Axilla/Groin	F28	PID01375	SRR30846283	SAMN43830236	Clade3	8	3.A.8.C
NV01759	2024-01-20 21:00:00	Axilla/Groin	F36	PID01375	SRR29365081	SAMN41409230	Clade3	8	3.A.8.C
NV01760	2024-01-21 21:00:00	Wound	F36	PID01375	SRR29364004	SAMN41409243	Clade1	12	1.A.12.C	0.5	0.25		256	0.25	0.5	0.12	0.12	8		ERG11: Lys143Arg	FUR1: Arg101Leu	B9J08_000401: Gln142*
NV01761	2024-01-18 21:00:00	Wound	F38	PID01375	SRR29365096	SAMN41409221	Clade1	4	1.A.4.D	0.25	0.12		>256	0.12	0.25	0.06	0.06	1		ERG11: Lys143Arg		B9J08_000401: Gln142*
NV01762	2024-07-22 21:00:00	Axilla/Groin	F39	PID01376	SRR33388474	SAMN48264949	Clade1	3	1.A.3.E											ERG11: Lys143Arg		B9J08_000401: Gln142*
NV01763	2024-01-24 21:00:00	Urine	F39	PID01377	SRR30844167	SAMN43817415	Clade1	2	1.B.2.A
NV01764	2024-03-10 21:00:00	Axilla/Groin	F39	PID01378	SRR30844130	SAMN43817379	Clade3	11	3.A.11.J
NV01765	2024-05-04 21:00:00	Axilla/Groin	F39	PID01378	SRR30867990	SAMN43829791	Clade3	11	3.A.11.J
NV01766	2024-05-04 21:00:00	Axilla/Groin	F39	PID01378	SRR30867989	SAMN43829790	Clade1	12	1.A.12.A											ERG11: Lys143Arg	FUR1: Arg101Leu	B9J08_000401: Gln142*
NV01767	2023-11-06 21:00:00	Skin Swab	F36	PID01379	SRR27607958	SAMN39273776	Clade3	11	3.A.11.E	0.5	0.5		256	0.25	0.5	0.25	0.12	2
NV01768	2023-12-20 21:00:00	Skin Swab	F36	PID01379	SRR28069390	SAMN40079081	Clade3	11	3.A.11.E	0.5	0.5		256	0.12	0.25	0.25	0.12	2
NV01769	2024-05-13 21:00:00	Axilla/Groin	F36	PID01379	SRR30946222	SAMN44245338	Clade1	1	1.B.1.A											ERG11: Tyr132Phe
NV01770	2023-11-27 21:00:00	Axilla/Groin	F30	PID01381	SRR27645291	SAMN39504651	Clade3	11	3.A.11.B
NV01771	2023-05-01 21:00:00	Axilla/Groin	F10	PID01382	SRR27636283	SAMN35640915	Clade3	13	3.A.13.C												FUR1: Val103Gly
NV01772	2023-09-25 21:00:00	Axilla/Groin	F36	PID01384	SRR27607990	SAMN39273904	Clade1	1	1.B.1.A
NV01773	2023-11-01 21:00:00	Axilla/Groin	F36	PID01384	SRR27645240	SAMN39504665	Clade1	1	1.B.1.A											ERG11: Tyr132Phe
NV01774	2024-01-21 21:00:00	Axilla/Groin	F36	PID01384	SRR29364018	SAMN41409248	Clade1	1	1.B.1.A											ERG11: Tyr132Phe
NV01775	2024-03-25 21:00:00	Axilla/Groin	F36	PID01384	SRR30847391	SAMN43830133	Clade1	1	1.B.1.A											ERG11: Tyr132Phe
NV01776	2024-03-25 21:00:00	Axilla/Groin	F36	PID01384	SRR30847390	SAMN43830132	Clade1	4	1.A.4.A											ERG11: Lys143Arg		B9J08_000401: Gln142*
NV01777	2024-05-15 21:00:00	Axilla/Groin	F36	PID01384	SRR30946257	SAMN44245359	Clade3	4	3.A.4.G
NV01778	2022-07-31 21:00:00	Skin Swab	F40	PID01385	SRR23108896	SAMN32670130	Clade3	3	3.A.3.L
NV01779	2023-07-31 21:00:00	Axilla/Groin	F38	PID01386	SRR27135692	SAMN38336467	Clade3	11	3.A.11.J
NV01780	2023-07-19 21:00:00	Axilla/Groin	F39	PID01388	SRR27135782	SAMN38336772	Clade3	3	3.A.3.B
NV01781	2023-10-12 21:00:00	Axilla/Groin	F12	PID01387	SRR27607930	SAMN39273876	Clade3	12	3.A.12.D
NV01782	2023-10-18 21:00:00	Axilla/Groin	F28	PID01387	SRR27607904	SAMN39273850	Clade3	12	3.A.12.D
NV01783	2021-12-02	Axilla/Groin	F40	PID03343	SRR19738689	SAMN29101402	Clade1	2	1.A.2.I											ERG11: Lys143Arg		B9J08_000401: Gln142*
NV01784	2022-10-19 21:00:00	Axilla/Groin	F39	PID01390	SRR23108777	SAMN32670024	Clade1	13	1.A.13.A											ERG11: Lys143Arg		B9J08_000401: Gln142*
NV01785	2022-07-30 21:00:00	Blood	F41	PID01390	SRR23109116	SAMN32670354	Clade3	5	3.A.5.E	0.25	0.25	0.25	256	0.25	0.12	0.25	0.12	1
NV01786	2022-09-17 21:00:00	Urine	F41	PID01390	SRR23109151	SAMN32670143	Clade1	13	1.A.13.A	0.5	1	0.25	>256	0.25	0.5	0.5	0.25	2		ERG11: Lys143Arg		B9J08_000401: Gln142*
NV01787	2022-10-19 21:00:00	Wound	F41	PID01390	SRR23108775	SAMN32670022	Clade1	13	1.A.13.A	0.25	1	1	256	1	1		1	2		ERG11: Lys143Arg		B9J08_000401: Gln142*
NV01788		Bone	F38	PID01391	SRR23920650	SAMN33829905	Clade1	9	1.A.9.A	0.06	0.5	0.25	256	0.5	0.5	0.25	0.25	2		ERG11: Lys143Arg		B9J08_000401: Gln142*
NV01789	2023-02-03 21:00:00	Skin Swab	F38	PID01391	SRR23920648	SAMN33829903	Clade1	9	1.A.9.A	0.5	1	0.25	256	1	0.5	0.5	0.25	4		ERG11: Lys143Arg		B9J08_000401: Gln142*
NV01790	2023-09-04 21:00:00	Axilla/Groin	F02	PID01392	SRR27135609	SAMN38336377	Clade3	11	3.A.11.E
NV01791	2023-09-04 21:00:00	Blood	F39	PID01392	SRR27645504	SAMN39504691	Clade3	11	3.A.11.E
NV01792	2024-04-18 21:00:00	Wound	F31	PID01393	SRR30866618	SAMN43829888	Clade3	4	3.A.4.F	0.5	0.25		256	0.12	0.25	0.25	0.12	1
NV01793	2024-03-19 21:00:00	Axilla/Groin	F33	PID01394	SRR30846261	SAMN43830214	Clade1	3	1.A.3.D											ERG11: Lys143Arg		B9J08_000401: Gln142*
NV01794	2024-03-21 21:00:00	Axilla/Groin	F33	PID01394	SRR30846245	SAMN43830198	Clade3	9	3.A.9.C
NV01795	2024-03-21 21:00:00	Axilla/Groin	F33	PID01394	SRR30846244	SAMN43830197	Clade1	3	1.A.3.D											ERG11: Lys143Arg		B9J08_000401: Gln142*
NV01796	2024-05-17 21:00:00	Axilla/Groin	F33	PID01394	SRR30946241	SAMN44245343	Clade3	9	3.A.9.C
NV01797	2024-05-17 21:00:00	Axilla/Groin	F33	PID01394	SRR30946240	SAMN44245342	Clade1	3	1.A.3.D											ERG11: Lys143Arg		B9J08_000401: Gln142*
NV01798	2023-02-05 21:00:00	Blood	F36	PID01395	SRR23920660	SAMN33829915	Clade3	4	3.A.4.D	1	1	0.5	256	0.25	0.5	0.5	0.25	4	FKS1: Ile1361Thr
NV01799	2024-03-25 21:00:00	Axilla/Groin	F36	PID01395	SRR30847388	SAMN43830130	Clade3	13	3.A.13.J
NV01800	2024-03-25 21:00:00	Axilla/Groin	F36	PID01395	SRR30847387	SAMN43830129	Clade1	2	1.A.2.E											ERG11: Lys143Arg	FUR1: Gly207Asp	B9J08_000401: Gln142*
NV01801	2023-09-30 21:00:00	Skin Swab	F39	PID01395	SRR27645318	SAMN39504860	Clade3	5	3.A.5.E	0.25	0.06	0.06	>256	0.5	1	0.12	0.5	2
NV01803	2023-11-13 21:00:00	Skin Swab	F39	PID01395	SRR27607896	SAMN39273746	Clade1	2	1.A.2.E											ERG11: Lys143Arg	FUR1: Ala88Val	B9J08_000401: Gln142*
NV01804	2024-04-07 21:00:00	Axilla/Groin	F36	PID01397	SRR30847308	SAMN43830050	Clade3	4	3.A.4.O
NV01805	2024-04-09 21:00:00	Axilla/Groin	F36	PID01397	SRR30865538	SAMN43829986	Clade3	4	3.A.4.O
NV01806	2024-01-16 21:00:00	Skin Swab	F29	PID01397	SRR29365067	SAMN41409205	Clade1	5	1.B.5.A											ERG11: Tyr132Phe
NV01807	2023-12-13 21:00:00	Axilla/Groin	F36	PID01398	SRR27718936	SAMN39600263	Clade3	13	3.A.13.K
NV01808	2022-05-22	Bone	F31	PID03535	SRR20081624	SAMN29634977	Clade3	4	3.A.4.B	0.5	0.5	0.25	256	0.12	0.25	0.25	0.12	2
NV01809	2022-03-23 21:00:00	Skin	F13	PID03535	SRR23958521	SAMN30468095	Clade3	4	3.A.4.B
NV01810	2024-03-20 21:00:00	Axilla/Groin	F13	PID01399	SRR30846266	SAMN43830219	Clade3	13	3.A.13.L
NV01812	2022-04-20 21:00:00	Skin	F12	PID03361	SRR23109127	SAMN32670365	Clade1	2	1.A.2.B											ERG11: Lys143Arg
NV01813	2024-03-11 21:00:00	Axilla/Groin	F12	PID01401	SRR30846295	SAMN43830248	Clade3	11	3.A.11.H
NV01814	2024-11-22	Urine	F38	PID03536	SRR33405823	SAMN48288219	Clade1	1	1.B.1.A	0.5	0.12		32	0.06	0.25	0.06	0.12	0.25		ERG11: Tyr132Phe
NV01815	2024-02-18 21:00:00	Urine	F39	PID01403	SRR29280460	SAMN41409430	Clade1	2	1.A.2.H											ERG11: Lys143Arg		B9J08_000401: Gln142*
NV01816	2024-01-09 21:00:00	Wound	F36	PID01404	SRR29364597	SAMN41409146	Clade3	13	3.A.13.M	0.25	0.5		>256	0.25	0.5	0.12	0.12	2
NV01817	2022-08-04 21:00:00	Skin Swab	F40	PID01405	SRR23108888	SAMN32670122	Clade3	3	3.A.3.L
NV01818	2024-07-14 21:00:00	Axilla/Groin	F36	PID01406	SRR33388595	SAMN48265038	Clade1	5	1.B.5.A											ERG11: Tyr132Phe
NV01819	2024-07-14 21:00:00	Axilla/Groin	F36	PID01406	SRR33388594	SAMN48265037	Clade3	3	3.A.3.J
NV01820	2023-07-21 21:00:00	Urine	F36	PID01407	SRR27130894	SAMN38336718	Clade3	4	3.A.4.F	0.5	0.5	0.5	>256	0.25	0.5		0.5	1
NV01821	2022-08-24 21:00:00	Skin Swab	F40	PID01410	SRR23137779	SAMN32797886	Clade3	3	3.A.3.K
NV01822	2022-12-20 21:00:00	Urine	F41	PID01410	SRR23137741	SAMN32797848	Clade1	2	1.A.2.D	0.25	0.06	0.06	128	0.12	0.25	0.06	0.12	1		ERG11: Lys143Arg		B9J08_000401: Gln142*
NV01823	2024-01-21 21:00:00	Skin Swab	F25	PID01409	SRR29364003	SAMN41409246	Clade3	11	3.A.11.F
NV01824	2024-06-18 21:00:00	Axilla/Groin	F12	PID01411	SRR33370051	SAMN48199625	Clade3	4	3.A.4.D
NV01825	2024-06-17 21:00:00	Blood	F25	PID01411	SRR33381062	SAMN48209794	Clade3	4	3.A.4.K	1	1		>256	0.12	0.5	0.5	0.25	2
NV01826	2023-06-30	Blood	F36	PID03537	SRR27130937	SAMN38336666	Clade3	5	3.A.5.F	0.5	0.25	0.12	256	0.12	0.5	0.25	0.12	2
NV01827	2023-05-03 21:00:00	Axilla/Groin	F10	PID01412	SRR27636282	SAMN35640890	Clade3	4	3.A.4.J
NV01828	2023-12-05 21:00:00	Urine	F39	PID01416	SRR27645510	SAMN39504616	Clade1	10	1.A.10.B	0.5	1		256	2	1	0.5	0.5	4		ERG11: Lys143Arg		B9J08_000401: Gln142*
NV01829	2023-12-05 21:00:00	Blood	F39	PID01416	SRR27645509	SAMN39504620	Clade1	10	1.A.10.B	0.5	0.5		256	1	1	0.25	0.5	4		ERG11: Lys143Arg		B9J08_000401: Gln142*
NV01830	2024-10-26	Blood	F39	PID01416	SRR33403334	SAMN48286634	Clade1	10	1.A.10.B	2	2		>256	1	2	1	0.5	4	FKS1: Trp1351Arg	ERG11: Lys143Arg		B9J08_000401: Gln142*
NV01831	2024-11-05	Wound	F39	PID01416	SRR33405896	SAMN48288267	Clade1	10	1.A.10.B	2	1		>256	1	2	2	1	2	FKS1: Trp1351Arg	ERG11: Lys143Arg		B9J08_000401: Gln142*
NV01832	2024-12-14	Peritoneal Fluid	F36	PID03538	SRR33405923	SAMN48288172	Clade3	7	3.A.7.C	0.5	1		256	0.25	0.5	0.25	0.12	2
NV01833	2023-10-05 21:00:00	Axilla/Groin	F10	PID01417	SRR27607975	SAMN39273889	Clade3	3	3.A.3.A
NV01834	2022-08-16 21:00:00	Skin Swab	F40	PID01419	SRR23137862	SAMN32797967	Clade3	4	3.A.4.J
NV01836	2022-11-07 21:00:00	Urine	F41	PID01419	SRR23137840	SAMN32797945	Clade1	11	1.A.11.C	0.25	0.5	0.25	>256	0.5	0.5	0.12	0.25	2		ERG11: Lys143Arg		B9J08_000401: Gln142*
NV01837	2022-10-07 21:00:00	Not Indicated	F12	PID01420	SRR23108926	SAMN32670064	Clade3	11	3.A.11.A
NV01838	2022-12-13 21:00:00	Skin Swab	F40	PID01421	SRR23137761	SAMN32797868	Clade1	2	1.A.2.H											ERG11: Lys143Arg		B9J08_000401: Gln142*
NV01839	2022-12-26 21:00:00	Axilla/Groin	F09	PID01422	SRR23249002	SAMN32934631	Clade3	3	3.A.3.K
NV01840	2022-10-16 21:00:00	Axilla/Groin	F12	PID01423	SRR23137869	SAMN32797974	Clade3	5	3.A.5.E
NV01841	2022-06-23 21:00:00	Blood	F17	PID01424	SRR23109231	SAMN32670383	Clade3	2	3.A.2.D	0.5	0.25	0.12	128	0.12	0.25	0.12	0.06	1
NV01842	2023-11-15 21:00:00	Axilla/Groin	F12	PID01425	SRR27645358	SAMN39504679	Clade3	4	3.A.4.H
NV01843	2024-01-15 21:00:00	Axilla/Groin	F39	PID01425	SRR29365121	SAMN41409188	Clade1	4	1.A.4.A											ERG11: Lys143Arg
NV01844	2022-12-25 21:00:00	Trachea	F36	PID01426	SRR23137727	SAMN32797834	Clade3	4	3.A.4.K	0.25	0.06	0.06	128	0.12	0.5	0.12	0.25	2
NV01845	2022-12-24 21:00:00	Blood	F36	PID01426	SRR23137789	SAMN32797830	Clade3	4	3.A.4.K
NV01846	2022-04-20 21:00:00	Skin	F12	PID03364	SRR23958510	SAMN30468084	Clade3	2	3.A.2.D
NV01847	2024-02-11 21:00:00	Axilla/Groin	F36	PID01427	SRR29280580	SAMN41409392	Clade3	6	3.A.6.B
NV01848	2024-08-05 21:00:00	Axilla/Groin	F12	PID01429	SRR33391947	SAMN48270066	Clade1	5	1.B.5.A											ERG11: Tyr132Phe
NV01849	2023-02-22 21:00:00	Axilla/Groin	F28	PID01430	SRR27636433	SAMN35641119	Clade1	12	1.A.12.C											ERG11: Lys143Arg	FUR1: Arg101Leu	B9J08_000401: Gln142*
NV01850	2023-07-31 21:00:00	Tissue	F38	PID01431	SRR27135685	SAMN38336466	Clade1	4	1.A.4.B	0.25	1	1	>256	0.5	1	0.5	0.25	1		ERG11: Lys143Arg		B9J08_000401: Gln142*
NV01851	2023-10-17 21:00:00	Axilla/Groin	F12	PID01432	SRR27607914	SAMN39273860	Clade1	12	1.A.12.B											ERG11: Lys143Arg	FUR1: Arg101Leu	B9J08_000401: Gln142*
NV01852	2024-01-20 21:00:00	Axilla/Groin	F36	PID01433	SRR29365084	SAMN41409235	Clade1	12	1.A.12.C											ERG11: Lys143Arg	FUR1: Arg101Leu	B9J08_000401: Gln142*
NV01853	2024-03-19 21:00:00	Axilla/Groin	F36	PID01435	SRR30846259	SAMN43830212	Clade3	5	3.A.5.C
NV01854	2024-05-19 21:00:00	Axilla/Groin	F39	PID01436	SRR30946498	SAMN44245650	Clade3	4	3.A.4.J
NV01855	2024-05-29 21:00:00	Axilla/Groin	F28	PID01438	SRR30946377	SAMN44245406	Clade3	13	3.A.13.L
NV01856	2022-12-19 21:00:00	Wound	F36	PID01439	SRR23249011	SAMN32934640	Clade3	11	3.A.11.E	0.5	0.12	0.12	128	0.12	0.25	0.12	0.12	2
NV01857	2022-10-04 21:00:00	Blood	F36	PID01440	SRR23108916	SAMN32670054	Clade1	4	1.A.4.E	0.25	0.5	0.5	>256	1	1	0.5	0.5	4		ERG11: Lys143Arg		B9J08_000401: Gln142*
NV01858	2022-10-19 21:00:00	Bronchial Washing	F36	PID01440	SRR23108764	SAMN32670011	Clade1	4	1.A.4.E	0.25	1	0.25	256	0.5	0.5	0.25	0.25	2		ERG11: Lys143Arg		B9J08_000401: Gln142*
NV01859	2023-05-29 21:00:00	Axilla/Groin	F28	PID01441	SRR27135714	SAMN38336444	Clade3	12	3.A.12.C
NV01860	2023-03-06 21:00:00	Axilla/Groin	F29	PID01442	SRR27636372	SAMN35641057	Clade3	11	3.A.11.E
NV01861	2022-12-26 21:00:00	Axilla/Groin	F09	PID01444	SRR23137730	SAMN32797837	Clade3	4	3.A.4.D
NV01862	2022-12-15 21:00:00	Skin Swab	F36	PID01444	SRR23249014	SAMN32934643	Clade3	4	3.A.4.B	0.5	0.12	0.06	128	0.06	0.25	0.06	0.06	1
NV01863	2023-08-22 21:00:00	Axilla/Groin	F07	PID01445	SRR27135627	SAMN38336493	Clade3	10	3.A.10.G
NV01864	2022-05-08 21:00:00	Axilla/Groin	F14	PID03392	SRR23958488	SAMN30468062	Clade1	2	1.A.2.I										FKS1: Leu640Val	ERG11: Lys143Arg		B9J08_000401: Gln142*
NV01865	2024-05-15 21:00:00	Axilla/Groin	F36	PID01446	SRR30946509	SAMN44245661	Clade3	12	3.A.12.D
NV01866	2024-04-22 21:00:00	Axilla/Groin	F39	PID01447	SRR30865463	SAMN43829911	Clade1	13	1.A.13.B											ERG11: Lys143Arg	FUR1: Ser84Leu	B9J08_000401: Gln142*
NV01867	2024-07-17 21:00:00	Axilla/Groin	F36	PID01448	SRR33388500	SAMN48265004	Clade3	13	3.A.13.D												FUR1: Val103Gly
NV01868	2022-12-26 21:00:00	Axilla/Groin	F39	PID01449	SRR23249004	SAMN32934633	Clade3	6	3.A.6.B												FUR1: Ala88Thr
NV01869	2023-05-06 21:00:00	Axilla/Groin	F39	PID01449	SRR27636275	SAMN35640883	Clade3	6	3.A.6.B												FUR1: Ala88Thr
NV01870	2023-05-06 21:00:00	Skin Swab	F39	PID01449	SRR27135956	SAMN38336409	Clade3	6	3.A.6.B	0.5	0.25	0.06	>256	0.06	0.25	0.12	0.06	2			FUR1: Ala88Thr
NV01871	2023-05-16 21:00:00	Skin Swab	F39	PID01449	SRR27135831	SAMN38336325	Clade3	6	3.A.6.B												FUR1: Ala88Thr
NV01872	2023-06-21 21:00:00	Axilla/Groin	F39	PID01449	SRR27130959	SAMN38336601	Clade3	6	3.A.6.B												FUR1: Ala88Thr
NV01873	2023-06-21 21:00:00	Axilla/Groin	F39	PID01449	SRR27135916	SAMN38336462	Clade1	13	1.A.13.F											ERG11: Lys143Arg	FUR1: Glu64*	B9J08_000401: Gln142*
NV01874	2023-07-22 21:00:00	Axilla/Groin	F39	PID01449	SRR27135771	SAMN38336499	Clade3	6	3.A.6.B												FUR1: Ala88Thr
NV01875	2023-07-22 21:00:00	Axilla/Groin	F39	PID01449	SRR27130897	SAMN38336702	Clade1	13	1.A.13.A											ERG11: Lys143Arg	FUR1: Gly176Asp	B9J08_000401: Gln142*
NV01876	2023-08-06 21:00:00	Urine	F36	PID01449	SRR27135878	SAMN38336446	Clade1	13	1.A.13.A	0.5	2	0.5	>256	1	0.5	1	0.5	2	FKS1: Phe635Leu	ERG11: Lys143Arg	FUR1: Gly176Asp	B9J08_000401: Gln142*
NV01877	2022-07-02	Urine	F17	PID03539	SRR23109135	SAMN32670373	Clade3	2	3.A.2.D	0.5	0.5	0.25	>256	0.12	0.5	0.5	0.25	2
NV01878	2023-10-23 21:00:00	Axilla/Groin	F33	PID01452	SRR27607864	SAMN39273831	Clade3	3	3.A.3.A
NV01879	2023-10-25 21:00:00	Axilla/Groin	F33	PID01452	SRR27607852	SAMN39273819	Clade3	3	3.A.3.A
NV01880	2023-12-03 21:00:00	Axilla/Groin	F33	PID01452	SRR28069467	SAMN40079129	Clade3	3	3.A.3.A
NV01881	2023-12-20 21:00:00	Axilla/Groin	F33	PID01452	SRR28069397	SAMN40079088	Clade3	3	3.A.3.A
NV01882	2023-12-22 21:00:00	Axilla/Groin	F33	PID01454	SRR28069398	SAMN40079089	Clade1	3	1.A.3.E											ERG11: Lys143Arg		B9J08_000401: Gln142*
NV01883	2022-12-07 21:00:00	Wound	F36	PID01455	SRR23137769	SAMN32797876	Clade3	11	3.A.11.E	0.25	0.5	0.12	128	0.12	0.25	0.25	0.12	1
NV01884	2023-04-19 21:00:00	Axilla/Groin	F33	PID01456	SRR27636440	SAMN35640891	Clade3	11	3.A.11.J
NV01885	2023-04-28 21:00:00	Axilla/Groin	F36	PID01456	SRR27636294	SAMN35640893	Clade3	11	3.A.11.J
NV01886	2023-05-21 21:00:00	Axilla/Groin	F38	PID01457	SRR27135825	SAMN38336317	Clade1	2	1.A.2.F											ERG11: Lys143Arg		B9J08_000401: Gln142*
NV01887	2024-04-10 21:00:00	Blood	F36	PID01458	SRR30847412	SAMN43830009	Clade3	13	3.A.13.H	0.5	0.5		256	0.12	0.5	0.25	0.25	1
NV01888	2023-06-07 21:00:00	Axilla/Groin	F12	PID01461	SRR27130990	SAMN38336622	Clade3	11	3.A.11.J
NV01889	2024-07-31 21:00:00	Axilla/Groin	F33	PID01462	SRR33392037	SAMN48270124	Clade3	4	3.A.4.J
NV01890	2024-04-30 21:00:00	Tissue	F39	PID01464	SRR30867955	SAMN43829756	Clade1	3	1.B.3.A	0.5	0.06		128	0.06	0.12	0.03	0.03	0.5		ERG11: Tyr132Phe
NV01891	2023-02-23 21:00:00	Urine	F36	PID01465	SRR27636418	SAMN35641104	Clade3	11	3.A.11.F	0.5	0.5	0.25	256	0.25	0.5	0.25	0.25	4
NV01892	2023-02-24 21:00:00	Trachea	F36	PID01465	SRR27636406	SAMN35641092	Clade3	11	3.A.11.E	1	0.25	0.25	256	0.12	0.5	0.12	0.25	0.5
NV01893	2023-03-05 21:00:00	Skin Swab	F36	PID01465	SRR27636489	SAMN35641046	Clade3	11	3.A.11.F	1	0.5	0.25	64	0.25	0.5	0.5	0.25	2
NV01894	2023-04-07 21:00:00	Wound	F36	PID01465	SRR27636334	SAMN35640856	Clade3	11	3.A.11.E	1	0.5	0.25	256	0.12	0.25	0.25	0.12	2
NV01895	2023-04-12 21:00:00	Axilla/Groin	F36	PID01465	SRR27636307	SAMN35640902	Clade3	11	3.A.11.F
NV01896	2023-06-16 21:00:00	Blood	F36	PID01465	SRR27130969	SAMN38336621	Clade3	11	3.A.11.B	1	0.5	0.25	256	0.12	0.25		0.06	2
NV01897	2023-06-27 21:00:00	Axilla/Groin	F36	PID01465	SRR27130951	SAMN38336653	Clade3	11	3.A.11.E
NV01898	2023-06-30	Wound	F36	PID01465	SRR27135890	SAMN38336321	Clade3	11	3.A.11.E	1	0.25	0.12	256	0.12	0.25	0.12	0.12	1
NV01899		Wound	F36	PID01466	SRR29364595	SAMN41408903	Clade1	13	1.A.13.C	0.25	1		>256	0.5	0.5	0.25	0.25	2	FKS1: Asp642Tyr	ERG11: Lys143Arg		B9J08_000401: Gln142*
NV01900	2023-11-12 21:00:00	Axilla/Groin	F36	PID01466	SRR27645372	SAMN39504631	Clade1	13	1.A.13.C										FKS1: Asp642Tyr	ERG11: Lys143Arg		B9J08_000401: Gln142*
NV01901	2023-09-14 21:00:00	Urine	F39	PID01467	SRR27645458	SAMN39504734	Clade3	4	3.A.4.B
NV01902	2024-02-04 21:00:00	Axilla/Groin	F28	PID01468	SRR30846272	SAMN43830225	Clade1	3	1.B.3.A											ERG11: Tyr132Phe
NV01903	2024-01-26 21:00:00	Axilla/Groin	F33	PID01468	SRR29363993	SAMN41409277	Clade1	3	1.B.3.A											ERG11: Tyr132Phe
NV01904	2024-02-10 21:00:00	Axilla/Groin	F36	PID01468	SRR29280586	SAMN41409383	Clade1	3	1.B.3.A											ERG11: Tyr132Phe
NV01905	2023-01-19 21:00:00	Axilla/Groin	F35	PID01469	SRR23920699	SAMN33829946	Clade3	4	3.A.4.D
NV01906	2022-11-04 21:00:00	Wound	F41	PID01469	SRR23137844	SAMN32797949	Clade3	4	3.A.4.D	0.5	1	0.25	256	0.12	0.25	0.5	0.12	2
NV01907	2023-01-19 21:00:00	Blood	F41	PID01469	SRR23920718	SAMN33829877	Clade3	4	3.A.4.D	0.5	0.5	0.5	256	0.25	0.5	0.25	0.25	2
NV01908	2023-02-19 21:00:00	Blood	F41	PID01471	SRR27636427	SAMN35641113	Clade1	2	1.A.2.C	0.25	0.5	0.25	256	0.25	1	0.25	0.25	2		ERG11: Lys143Arg		B9J08_000401: Gln142*
NV01909	2023-04-30 21:00:00	Axilla/Groin	F28	PID01472	SRR27636289	SAMN35640941	Clade1	11	1.A.11.A											ERG11: Lys143Arg		B9J08_000401: Gln142*
NV01910	2023-05-18 21:00:00	Axilla/Groin	F14	PID01473	SRR27135830	SAMN38336753	Clade3	13	3.A.13.B
NV01911	2023-09-08 21:00:00	Skin Swab	F36	PID01474	SRR27135749	SAMN38336410	Clade3	13	3.A.13.K
NV01912	2024-04-29 21:00:00	Axilla/Groin	F13	PID01475	SRR30866586	SAMN43829856	Clade3	13	3.A.13.K
NV01913	2024-04-29 21:00:00	Axilla/Groin	F13	PID01475	SRR30866585	SAMN43829855	Clade1	2	1.A.2.G											ERG11: Lys143Arg		B9J08_000401: Gln142*
NV01914	2024-03-27 21:00:00	Axilla/Groin	F14	PID01475	SRR30847374	SAMN43830116	Clade3	13	3.A.13.K
NV01915	2024-04-15 21:00:00	Axilla/Groin	F36	PID01475	SRR30865523	SAMN43829971	Clade3	13	3.A.13.K
NV01916	2024-04-15 21:00:00	Wound	F36	PID01475	SRR30866632	SAMN43829902	Clade3	13	3.A.13.K	0.5	0.5		256	0.06	0.25	0.25	0.12	2
NV01917	2024-01-31 21:00:00	Axilla/Groin	F29	PID01476	SRR30846276	SAMN43830229	Clade3	1	3.A.1.D
NV01918	2024-03-04 21:00:00	Axilla/Groin	F28	PID01477	SRR30847445	SAMN43830170	Clade3	13	3.A.13.K
NV01919	2024-02-25 21:00:00	Groin	F36	PID01477	SRR29280504	SAMN41409474	Clade3	4	3.A.4.O
NV01920	2023-10-11 21:00:00	Axilla/Groin	F29	PID01478	SRR27607929	SAMN39273875	Clade1	2	1.B.2.A
NV01921	2023-08-08 21:00:00	Axilla/Groin	F39	PID01478	SRR27135881	SAMN38336755	Clade1	2	1.B.2.A											ERG11: Tyr132Phe
NV01922	2024-01-10 21:00:00	Axilla/Groin	F39	PID01478	SRR29364611	SAMN41409155	Clade1	12	1.A.12.A											ERG11: Lys143Arg	FUR1: Arg101Leu	B9J08_000401: Gln142*
NV01923	2023-01-12 21:00:00	Blood	F36	PID01479	SRR23920667	SAMN33829938	Clade1	4	1.A.4.C	0.12	0.5	0.25	256	0.5	0.5	0.25	0.25	2		ERG11: Lys143Arg		B9J08_000401: Gln142*
NV01924	2022-12-31 21:00:00	Blood	F41	PID01479	SRR23248996	SAMN32934625	Clade1	4	1.A.4.C	0.12	0.25	0.25	256	0.5	0.5	0.25	0.25	4		ERG11: Lys143Arg		B9J08_000401: Gln142*
NV01925	2023-01-10 21:00:00	Urine	F41	PID01479	SRR23920724	SAMN33829883	Clade1	4	1.A.4.C	0.25	0.5	0.25	256	0.12	0.5	0.25	0.12	4		ERG11: Lys143Arg		B9J08_000401: Gln142*
NV01926	2024-01-16 21:00:00	Axilla/Groin	F35	PID01480	SRR29365115	SAMN41409197	Clade3	5	3.A.5.D
NV01927	2022-05-08 21:00:00	Skin	F31	PID01481	SRR19738716	SAMN29101427	Clade1	2	1.A.2.B	1	1	0.5	256	1	0.5	2	0.5	2	FKS1: Arg641Ser	ERG11: Lys143Arg	FUR1: Leu142fs
NV01928	2022-07-20 21:00:00	Skin	F12	PID01481	SRR23109128	SAMN32670366	Clade1	2	1.A.2.B											ERG11: Lys143Arg	FUR1: Leu142fs
NV01929	2024-11-11	Catheter Tip	F39	PID01482	SRR33405905	SAMN48288276	Clade3	10	3.A.10.D	0.5	2		>256	0.5	1	1	0.5	4
NV01930	2023-10-31 21:00:00	Axilla/Groin	F36	PID01484	SRR27607830	SAMN39273797	Clade3	4	3.A.4.F
NV01931	2023-03-05 21:00:00	Axilla/Groin	F10	PID01485	SRR27135973	SAMN38336468	Clade1	4	1.A.4.C											ERG11: Lys143Arg		B9J08_000401: Gln142*
NV01932	2024-04-21 21:00:00	Axilla/Groin	F35	PID01488	SRR30865478	SAMN43829926	Clade3	3	3.A.3.B
NV01933	2022-10-13 21:00:00	Axilla/Groin	F12	PID01491	SRR23137870	SAMN32797975	Clade3	4	3.A.4.D
NV01934	2024-05-22 21:00:00	Axilla/Groin	F36	PID01492	SRR30946231	SAMN44245301	Clade1	5	1.B.5.A											ERG11: Tyr132Phe
NV01935	2024-03-04 21:00:00	Wound	F36	PID01493	SRR30846362	SAMN43817272	Clade3	12	3.A.12.H	0.25	0.12		256	0.12	0.25	0.12	0.12	1
NV01936	2024-06-14 21:00:00	Axilla/Groin	F30	PID01494	SRR30946898	SAMN44246083	Clade1	11	1.A.11.A											ERG11: Lys143Arg		B9J08_000401: Gln142*
NV01937	2023-06-22 21:00:00	Axilla/Groin	F29	PID01495	SRR27135907	SAMN38336435	Clade3	4	3.A.4.M
NV01938	2023-07-28 21:00:00	Axilla/Groin	F28	PID01496	SRR27130884	SAMN38336698	Clade1	13	1.A.13.E											ERG11: Lys143Arg		B9J08_000401: Gln142*
NV01939	2024-02-04 21:00:00	Axilla/Groin	F36	PID01497	SRR30844158	SAMN43817406	Clade1	5	1.B.5.A											ERG11: Tyr132Phe
NV01940	2024-02-20 21:00:00	Groin	F36	PID01497	SRR29280523	SAMN41409444	Clade1	2	1.A.2.B											ERG11: Lys143Arg		B9J08_000401: Gln142*
NV01941	2024-03-17 21:00:00	Axilla/Groin	F36	PID01497	SRR30847440	SAMN43830165	Clade1	5	1.B.5.A											ERG11: Tyr132Phe
NV01942	2024-04-25 21:00:00	Axilla/Groin	F36	PID01497	SRR30867996	SAMN43829797	Clade1	5	1.B.5.A											ERG11: Tyr132Phe
NV01943	2024-04-25 21:00:00	Axilla/Groin	F36	PID01497	SRR30867995	SAMN43829796	Clade1	13	1.A.13.E											ERG11: Lys143Arg		B9J08_000401: Gln142*
NV01944	2024-05-06 21:00:00	Wound	F36	PID01497	SRR30946271	SAMN44245372	Clade1	5	1.B.5.A	0.5	0.5		64	0.03	0.12	0.25	0.06	0.25		ERG11: Tyr132Phe
NV01945	2024-03-31 21:00:00	Axilla/Groin	F36	PID01498	SRR30865552	SAMN43830000	Clade1	12	1.A.12.C											ERG11: Lys143Arg	FUR1: Arg101Leu	B9J08_000401: Gln142*
NV01947	2024-07-15 21:00:00	Axilla/Groin	F36	PID01498	SRR33388525	SAMN48265028	Clade1	12	1.A.12.C											ERG11: Lys143Arg	FUR1: Arg101Leu	B9J08_000401: Gln142*
NV01948	2024-09-18	Wound	F36	PID01498	SRR33403356	SAMN48286714	Clade1	12	1.A.12.C	0.25	0.25		128	0.12	0.25	0.12	0.12	0.5		ERG11: Lys143Arg	FUR1: Arg101Leu	B9J08_000401: Gln142*
NV01949	2024-09-24	Wound	F36	PID01498	SRR33403291	SAMN48286679	Clade1	12	1.A.12.C	0.25	0.5		256	0.25	0.5	0.25	0.25	1		ERG11: Lys143Arg	FUR1: Arg101Leu	B9J08_000401: Gln142*
NV01950	2023-10-13 21:00:00	Axilla/Groin	F36	PID01499	SRR27607926	SAMN39273872	Clade1	2	1.B.2.A											ERG11: Tyr132Phe
NV01951	2023-10-13 21:00:00	Axilla/Groin	F36	PID01499	SRR27607925	SAMN39273871	Clade1	12	1.A.12.B											ERG11: Lys143Arg
NV01952	2023-11-16 21:00:00	Axilla/Groin	F36	PID01499	SRR27718909	SAMN39600283	Clade1	2	1.A.2.C											ERG11: Lys143Arg		B9J08_000401: Gln142*
NV01953	2023-04-03 21:00:00	Axilla/Groin	F10	PID01500	SRR27135970	SAMN38336553	Clade3	3	3.A.3.B
NV01954	2023-10-26 21:00:00	Trachea	F36	PID01501	SRR30846314	SAMN43817231	Clade3	13	3.A.13.K	1	0.25		256	0.12	0.5	0.5	0.12	1
NV01955	2023-03-15 21:00:00	Axilla/Groin	F14	PID01502	SRR27636471	SAMN35641028	Clade3	12	3.A.12.D
NV01956	2023-02-16 21:00:00	Wound	F39	PID01502	SRR27636517	SAMN35641138	Clade1	12	1.A.12.C	0.5	1	0.5	256	0.5	1	0.25	0.5	4		ERG11: Lys143Arg	FUR1: Arg101Leu	B9J08_000401: Gln142*
NV01957	2024-02-18 21:00:00	Sputum	F38	PID01503	SRR29280521	SAMN41409433	Clade3	11	3.A.11.A
NV01958	2023-02-23 21:00:00	Axilla/Groin	F39	PID01504	SRR27636424	SAMN35641110	Clade3	13	3.A.13.D												FUR1: Val103Gly
NV01959	2024-12-04	Wound	F36	PID03540	SRR33405937	SAMN48288186	Clade3	13	3.A.13.L	1	0.06		64	0.03	0.12	0.03	0.12	0.5
NV01960	2024-01-09 21:00:00	Axilla/Groin	F36	PID01506	SRR29364617	SAMN41409148	Clade3	11	3.A.11.J
NV01961	2024-01-27 21:00:00	Urine	F39	PID01506	SRR29363983	SAMN41409284	Clade3	4	3.A.4.K
NV01962	2023-07-27 21:00:00	Wound	F39	PID01507	SRR27135698	SAMN38336545	Clade3	12	3.A.12.C	0.125	0.25	0.12	64	0.25	0.5	0.12	0.25	1
NV01963	2022-12-13 21:00:00	Skin Swab	F40	PID01510	SRR23137755	SAMN32797862	Clade3	11	3.A.11.A
NV01964	2022-12-18 21:00:00	Axilla/Groin	F28	PID01510	SRR23137746	SAMN32797853	Clade3	11	3.A.11.A
NV01965	2021-08-21	Urine	F40	PID03360	SRR19738701	SAMN29101413	Clade1	2	1.A.2.I											ERG11: Lys143Arg		B9J08_000401: Gln142*
NV01966	2024-08-18 21:00:00	Not Indicated	F15	PID01511	SRR33391931	SAMN48270021	Clade1	3	1.A.3.C	0.25	0.5		256	0.5	0.5	0.12	0.12	1		ERG11: Lys143Arg		B9J08_000401: Gln142*
NV01967	2024-05-19 21:00:00	Wound	F39	PID01511	SRR30946410	SAMN44245439	Clade1	3	1.A.3.C	0.5	2		>256	0.5	0.5	0.5	0.25	2		ERG11: Lys143Arg		B9J08_000401: Gln142*
NV01968	2024-08-19 21:00:00	Tissue	F39	PID01511	SRR33391940	SAMN48270030	Clade1	3	1.A.3.C	0.25	0.5		>256	0.5	0.5	0.25	0.12	2		ERG11: Lys143Arg		B9J08_000401: Gln142*
NV01969	2024-08-19 21:00:00	Fluid	F39	PID01511	SRR33391941	SAMN48270031	Clade1	3	1.A.3.C	0.25	1		>256	0.5	0.25	0.5	0.25	2		ERG11: Lys143Arg		B9J08_000401: Gln142*
NV01970	2024-03-05 21:00:00	Trachea	F36	PID01512	SRR30844136	SAMN43817385	Clade3	3	3.A.3.F	0.5	0.25		>256	0.12	0.25	0.25	0.12	0.5
NV01971	2024-06-03 21:00:00	Axilla/Groin	F39	PID01513	SRR30946451	SAMN44245603	Clade1	12	1.A.12.C											ERG11: Lys143Arg	FUR1: Arg101Leu	B9J08_000401: Gln142*
NV01972	2024-05-14 21:00:00	Axilla/Groin	F36	PID01517	SRR30946425	SAMN44245454	Clade3	12	3.A.12.B
NV01973	2024-05-26 21:00:00	Urine	F36	PID01517	SRR30946471	SAMN44245623	Clade3	12	3.A.12.B	1	0.5		>256	0.25	0.25	0.25	0.12	2
NV01974	2024-01-17 21:00:00	Axilla/Groin	F39	PID01518	SRR29365106	SAMN41409207	Clade3	9	3.A.9.A
NV01975	2024-04-26 21:00:00	Axilla/Groin	F36	PID01519	SRR30866609	SAMN43829879	Clade3	4	3.A.4.F
NV01976	2024-05-16 21:00:00	Axilla/Groin	F36	PID01519	SRR30946221	SAMN44245337	Clade3	4	3.A.4.F
NV01977	2024-06-04 21:00:00	Axilla/Groin	F36	PID01519	SRR30946966	SAMN44246151	Clade1	1	1.B.1.A											ERG11: Tyr132Phe
NV01978	2024-06-04 21:00:00	Axilla/Groin	F36	PID01519	SRR30946965	SAMN44246150	Clade3	4	3.A.4.F
NV01979	2023-10-15 21:00:00	Urine	F38	PID01515	SRR27645390	SAMN39504826	Clade3	4	3.A.4.J	1	0.5		64	0.12	0.25	0.25	0.12	1
NV01980	2024-10-24	Urine	F39	PID03541	SRR33403255	SAMN48286643	Clade1	4	1.A.4.D	0.25	2		>256	1	1	0.5	0.5	4		ERG11: Lys143Arg		B9J08_000401: Gln142*
NV01981	2023-05-05 21:00:00	Axilla/Groin	F39	PID01520	SRR27636274	SAMN35640900	Clade3	5	3.A.5.F
NV01982	2023-02-16 21:00:00	Skin Swab	F41	PID01521	SRR23920729	SAMN33829888	Clade3	10	3.A.10.C
NV01983	2022-10-22 21:00:00	Wound	F36	PID01522	SRR23108761	SAMN32670008	Clade3	12	3.A.12.A	0.5	0.25	0.12	256	0.12	0.25		0.06	1
NV01984	2023-10-16 21:00:00	Axilla/Groin	F14	PID01523	SRR27607916	SAMN39273862	Clade3	13	3.A.13.K
NV01985	2023-10-31 21:00:00	Axilla/Groin	F33	PID01524	SRR27607831	SAMN39273798	Clade3	13	3.A.13.K
NV01986	2023-11-24 21:00:00	Axilla/Groin	F36	PID01524	SRR27718889	SAMN39600261	Clade3	13	3.A.13.K
NV01987	2022-10-28 21:00:00	Skin Swab	F41	PID01526	SRR23108855	SAMN32669993	Clade1	2	1.A.2.I	0.5	0.5	0.25	64	0.12	0.5		0.25	2	FKS1: Leu640Val	ERG11: Lys143Arg		B9J08_000401: Gln142*
NV01988	2023-01-07 21:00:00	Blood	F41	PID01526	SRR23248976	SAMN32934605	Clade1	2	1.A.2.I	0.12	0.5	0.12	256	0.5	0.5	0.25	0.25	2	FKS1: Leu640Val	ERG11: Lys143Arg		B9J08_000401: Gln142*
NV01989	2023-01-12 21:00:00	Catheter Tip	F41	PID01526	SRR23920722	SAMN33829881	Clade1	2	1.A.2.I	0.12	0.25	0.06	256	0.5	0.5	0.25	0.25	2	FKS1: Leu640Val	ERG11: Lys143Arg		B9J08_000401: Gln142*
NV01990	2022-05-08 21:00:00	Axilla/Groin	F14	PID01526	SRR23958492	SAMN30468066	Clade3	2	3.A.2.D
NV01991	2024-02-13 21:00:00	Axilla/Groin	F13	PID01527	SRR29280556	SAMN41409408	Clade3	6	3.A.6.E
NV01992	2024-03-22 21:00:00	Axilla/Groin	F33	PID01527	SRR30847428	SAMN43830153	Clade3	6	3.A.6.E
NV01993	2023-02-07 21:00:00	Blood	F41	PID01528	SRR23920714	SAMN33829869	Clade3	10	3.A.10.C	0.5	0.5	0.12	256	0.25	0.5	0.25	0.25	4
NV01994	2023-11-12 21:00:00	Axilla/Groin	F36	PID01529	SRR27645373	SAMN39504647	Clade3	5	3.A.5.E
NV01995	2024-10-18	Urine	F36	PID03542	SRR33403325	SAMN48286625	Clade3	13	3.A.13.M	1	0.5		256	0.12	0.5	0.25	0.12	0.1
NV01996	2024-11-10	Blood	F36	PID03542	SRR33405850	SAMN48288246	Clade3	13	3.A.13.M	0.5	2		>256	0.12	0.5	0.5	0.25	4
NV01997	2024-11-10	Wound	F36	PID03542	SRR33405845	SAMN48288241	Clade3	13	3.A.13.M	0.5	1		256	0.25	1	1	0.5	4
NV01998	2024-11-19	Catheter Tip	F36	PID03542	SRR33405832	SAMN48288228	Clade3	13	3.A.13.M	1	0.12		128	0.015	0.06	0.06	0.06	0.5
NV01999	2023-12-19 21:00:00	Axilla/Groin	F36	PID01531	SRR28069412	SAMN40079103	Clade3	5	3.A.5.B
NV02000	2024-09-13	Urine	F38	PID03543	SRR33403343	SAMN48286701	Clade1	2	1.B.2.A	0.5	0.12		32	0.03	0.06	0.06	0.03	0.25		ERG11: Tyr132Phe
NV02001	2022-10-16 21:00:00	Axilla/Groin	F33	PID01532	SRR23108782	SAMN32670029	Clade3	10	3.A.10.E
NV02002	2022-08-31 21:00:00	Skin Swab	F40	PID01533	SRR23248991	SAMN32934620	Clade3	4	3.A.4.C
NV02003	2023-09-18 21:00:00	Axilla/Groin	F12	PID01534	SRR27645457	SAMN39504706	Clade3	13	3.A.13.D												FUR1: Val103Gly
NV02004	2022-09-05 21:00:00	Blood	F36	PID01535	SRR23109176	SAMN32670200	Clade3	2	3.A.2.D	0.5	0.25	0.12	>256	0.25	0.5		0.12	2
NV02005	2024-08-29 21:00:00	Blood	F39	PID01537	SRR33391928	SAMN48270018	Clade3	13	3.A.13.G	0.5	0.5		256	0.12	0.25	0.25	0.12	2
NV02006	2024-08-29 21:00:00	Urine	F39	PID01537	SRR33391926	SAMN48270016	Clade3	13	3.A.13.G	0.5	0.5		256	0.12	0.5	0.25	0.25	2
NV02007	2024-10-03	Blood	F39	PID01537	SRR33403299	SAMN48286687	Clade3	13	3.A.13.G	0.5	0.25		256	0.12	0.5	0.25	0.12	2			FUR1: Glu182fs
NV02008	2024-10-07	Trachea	F39	PID01537	SRR33403265	SAMN48286653	Clade3	13	3.A.13.G	0.5	0.5		64	0.12	0.25	0.25	0.12	1			FUR1: Gly35fs
NV02009	2023-05-23 21:00:00	Axilla/Groin	F33	PID01538	SRR27135822	SAMN38336770	Clade3	6	3.A.6.E
NV02010	2023-04-13 21:00:00	Urine	F38	PID01539	SRR27636461	SAMN35640920	Clade1	2	1.A.2.H										FKS1: Ser639Tyr	ERG11: Lys143Arg		B9J08_000401: Gln142*
NV02011	2023-06-25 21:00:00	Urine	F38	PID01539	SRR27130953	SAMN38336646	Clade1	2	1.A.2.H	0.5	0.12	0.12	64	0.03	0.12		0.06	1	FKS1: Ser639Tyr	ERG11: Lys143Arg		B9J08_000401: Gln142*
NV02012	2022-12-07 21:00:00	Axilla/Groin	F29	PID01540	SRR23249025	SAMN32934654	Clade3	3	3.A.3.D
NV02013	2023-09-15 21:00:00	Axilla/Groin	F07	PID01541	SRR27645470	SAMN39504769	Clade3	8	3.A.8.B
NV02014	2023-10-17 21:00:00	Urine	F36	PID01543	SRR27645394	SAMN39504836	Clade3	2	3.A.2.D	0.5	0.12		256	0.12	0.25	0.12	0.12	1
NV02015	2023-11-20 21:00:00	Axilla/Groin	F33	PID01542	SRR27645311	SAMN39504594	Clade3	2	3.A.2.D
NV02016	2024-07-04 21:00:00	Axilla/Groin	F10	PID01544	SRR33381110	SAMN48209770	Clade3	12	3.A.12.E
NV02017	2024-02-20 21:00:00	Blood	F36	PID01545	SRR29280516	SAMN41409446	Clade1	2	1.A.2.B										FKS1: Arg641Gly	ERG11: Lys143Arg		B9J08_000401: His138_Ala145del
NV02018	2024-06-24 21:00:00	Wound	F36	PID01546	SRR33381066	SAMN48209798	Clade1	3	1.B.3.A	1	0.12		64	0.12	0.25	0.06	0.12	0.5		ERG11: Tyr132Phe
NV02019	2024-07-11 21:00:00	Axilla/Groin	F36	PID01546	SRR33388611	SAMN48265054	Clade1	3	1.B.3.A											ERG11: Tyr132Phe
NV02020	2024-07-14 21:00:00	Axilla/Groin	F36	PID01546	SRR33388607	SAMN48265050	Clade1	3	1.B.3.A											ERG11: Tyr132Phe
NV02021	2022-08-30 21:00:00	Blood	F36	PID01547	SRR23109024	SAMN32670230	Clade3	4	3.A.4.B	0.25	0.25	0.12	128	0.06	0.25		0.12	1
NV02022	2022-09-26 21:00:00	Surgery Culture	F36	PID01547	SRR23108877	SAMN32670111	Clade1	3	1.A.3.A	0.5	0.5	0.25	256	0.25	0.12	0.25	0.12	1		ERG11: Lys143Arg		B9J08_000401: Gln142*
NV02023	2023-05-03 21:00:00	Axilla/Groin	F36	PID01547	SRR27636281	SAMN35640955	Clade1	3	1.A.3.A											ERG11: Lys143Arg	FUR1: Gly106Asp	B9J08_000401: Gln142*
NV02024	2022-04-04 21:00:00	Skin	F13	PID03348	SRR23958518	SAMN30468092	Clade3	5	3.A.5.E
[truncated: 2,313 more rows]

## Sheet: Supp. Table 2
Subclade	Count of Deidentified Accession ID
1.A.1.A	3
1.A.1.B	11
1.A.10.A	7
1.A.10.B	31
1.A.11.A	37
1.A.11.B	47
1.A.11.C	60
1.A.12.A	27
1.A.12.B	28
1.A.12.C	77
1.A.13.A	68
1.A.13.B	28
1.A.13.C	27
1.A.13.D	39
1.A.13.E	36
1.A.13.F	58
1.A.2.A	6
1.A.2.B	31
1.A.2.C	9
1.A.2.D	4
1.A.2.E	13
1.A.2.F	17
1.A.2.G	6
1.A.2.H	53
1.A.2.I	39
1.A.3.A	37
1.A.3.B	11
1.A.3.C	43
1.A.3.D	35
1.A.3.E	35
1.A.4.A	15
1.A.4.B	24
1.A.4.C	12
1.A.4.D	15
1.A.4.E	27
1.A.5.A	9
1.A.5.B	9
1.A.5.C	13
1.A.6.A	6
1.A.7.A	13
1.A.8.A	37
1.A.9.A	27
1.B.1.A	134
1.B.2.A	87
1.B.3.A	74
1.B.4.A	47
1.B.5.A	90
3.A.1.A	7
3.A.1.B	19
3.A.1.C	8
3.A.1.D	40
3.A.10.A	19
3.A.10.B	12
3.A.10.C	15
3.A.10.D	14
3.A.10.E	56
3.A.10.F	10
3.A.10.G	14
3.A.11.A	57
3.A.11.B	17
3.A.11.C	13
3.A.11.D	12
3.A.11.E	42
3.A.11.F	18
3.A.11.G	10
3.A.11.H	39
3.A.11.I	18
3.A.11.J	50
3.A.12.A	11
3.A.12.B	21
3.A.12.C	37
3.A.12.D	71
3.A.12.E	34
3.A.12.F	13
3.A.12.G	34
3.A.12.H	17
3.A.13.A	13
3.A.13.B	22
3.A.13.C	22
3.A.13.D	56
3.A.13.E	48
3.A.13.F	19
3.A.13.G	22
3.A.13.H	19
3.A.13.I	9
3.A.13.J	8
3.A.13.K	78
3.A.13.L	52
3.A.13.M	59
3.A.2.A	14
3.A.2.B	7
3.A.2.C	5
3.A.2.D	60
3.A.3.A	23
3.A.3.B	20
3.A.3.C	24
3.A.3.D	16
3.A.3.E	11
3.A.3.F	19
3.A.3.G	11
3.A.3.H	13
3.A.3.I	13
3.A.3.J	21
3.A.3.K	44
3.A.3.L	25
3.A.3.M	14
3.A.4.A	5
3.A.4.B	41
3.A.4.C	49
3.A.4.D	57
3.A.4.E	9
3.A.4.F	57
3.A.4.G	35
3.A.4.H	10
3.A.4.I	5
3.A.4.J	106
3.A.4.K	34
3.A.4.L	16
3.A.4.M	6
3.A.4.N	22
3.A.4.O	36
3.A.4.P	8
3.A.5.A	8
3.A.5.B	14
3.A.5.C	19
3.A.5.D	19
3.A.5.E	167
3.A.5.F	45
3.A.5.G	14
3.A.6.A	29
3.A.6.B	65
3.A.6.C	15
3.A.6.D	18
3.A.6.E	94
3.A.6.F	6
3.A.6.G	28
3.A.7.A	8
3.A.7.B	14
3.A.7.C	7
3.A.7.D	5
3.A.7.E	8
3.A.8.A	53
3.A.8.B	9
3.A.8.C	26
3.A.8.D	12
3.A.8.E	13
3.A.9.A	17
3.A.9.B	26
3.A.9.C	11
3.B.1.A	9
Grand Total	4312

## Sheet: Supp. Table 3
Subclade	Min of Date Collected	Max of Date Collected
1.A.1.A	2022-03-07	2023-10-25 21:00:00
1.A.1.B	2022-04-20 21:00:00	2024-11-05
1.A.10.A	2024-01-29 21:00:00	2024-07-04 21:00:00
1.A.10.B	2023-06-14 21:00:00	2024-12-03
1.A.11.A	2022-05-01 21:00:00	2024-12-10
1.A.11.B	2023-03-23 21:00:00	2024-11-13
1.A.11.C	2022-11-07 21:00:00	2024-12-10
1.A.12.A	2022-05-15 21:00:00	2024-11-30
1.A.12.B	2023-02-16 21:00:00	2024-12-05
1.A.12.C	2023-02-16 21:00:00	2024-11-20
1.A.13.A	2022-02-04	2024-12-08
1.A.13.B	2022-05-10 21:00:00	2024-05-07 21:00:00
1.A.13.C	2022-10-28 21:00:00	2024-12-15
1.A.13.D	2023-04-12 21:00:00	2024-11-23
1.A.13.E	2022-05-10 21:00:00	2024-12-04
1.A.13.F	2023-01-13 21:00:00	2024-09-18
1.A.2.A	2023-10-09 21:00:00	2024-11-21
1.A.2.B	2022-03-03	2024-06-01 21:00:00
1.A.2.C	2022-07-24 21:00:00	2024-03-06 21:00:00
1.A.2.D	2022-10-23 21:00:00	2022-12-20 21:00:00
1.A.2.E	2022-08-02 21:00:00	2024-09-07
1.A.2.F	2022-11-22 21:00:00	2024-09-15
1.A.2.G	2024-03-13 21:00:00	2024-09-09
1.A.2.H	2021-12-22	2024-12-11
1.A.2.I	2021-08-21	2024-08-19 21:00:00
1.A.3.A	2022-02-05	2024-07-22 21:00:00
1.A.3.B	2022-04-20 21:00:00	2024-12-03
1.A.3.C	2022-08-10 21:00:00	2024-10-01
1.A.3.D	2022-04-24 21:00:00	2024-12-13
1.A.3.E	2023-04-12 21:00:00	2024-11-18
1.A.4.A	2022-06-28 21:00:00	2024-09-08 21:00:00
1.A.4.B	2021-11-30	2024-02-16 21:00:00
1.A.4.C	2022-09-15 21:00:00	2024-07-30 21:00:00
1.A.4.D	2023-06-13 21:00:00	2024-10-24
1.A.4.E	2022-10-04 21:00:00	2024-07-05 21:00:00
1.A.5.A	2022-05-31 21:00:00	2023-05-24 21:00:00
1.A.5.B	2023-07-05 21:00:00	2024-08-07 21:00:00
1.A.5.C	2021-11-08	2023-10-17 21:00:00
1.A.6.A	2022-06-01	2024-03-12 21:00:00
1.A.7.A	2023-02-21 21:00:00	2024-10-08
1.A.8.A	2022-06-09	2024-12-02
1.A.9.A	2022-06-17 21:00:00	2024-11-20
1.B.1.A	2023-04-04 21:00:00	2024-12-05
1.B.2.A	2022-11-17 21:00:00	2024-12-14
1.B.3.A	2022-09-26 21:00:00	2024-12-15
1.B.4.A	2023-03-21 21:00:00	2024-11-20
1.B.5.A	2023-10-18 21:00:00	2024-11-25
3.A.1.A	2023-11-27 21:00:00	2024-07-26 21:00:00
3.A.1.B	2022-09-14 21:00:00	2024-04-22 21:00:00
3.A.1.C	2022-04-10 21:00:00	2024-11-18
3.A.1.D	2022-06-25 21:00:00	2024-12-03
3.A.10.A	2022-08-02 21:00:00	2024-11-05
3.A.10.B	2022-12-12 21:00:00	2024-01-14 21:00:00
3.A.10.C	2022-12-08 21:00:00	2024-06-23 21:00:00
3.A.10.D	2024-02-24 21:00:00	2024-12-04
3.A.10.E	2022-10-16 21:00:00	2024-11-18
3.A.10.F	2024-02-25 21:00:00	2024-11-07
3.A.10.G	2022-06-01 21:00:00	2024-07-06 21:00:00
3.A.11.A	2021-11-17	2024-10-13
3.A.11.B	2023-03-20 21:00:00	2024-06-17 21:00:00
3.A.11.C	2023-08-28 21:00:00	2024-12-16
3.A.11.D	2024-03-21 21:00:00	2024-09-01 21:00:00
3.A.11.E	2022-12-07 21:00:00	2024-12-01
3.A.11.F	2023-02-23 21:00:00	2024-06-17 21:00:00
3.A.11.G	2023-06-14 21:00:00	2024-11-04
3.A.11.H	2023-04-09 21:00:00	2024-10-14
3.A.11.I	2023-09-22 21:00:00	2024-11-29
3.A.11.J	2023-03-19 21:00:00	2024-11-23
3.A.12.A	2022-08-31 21:00:00	2024-05-12 21:00:00
3.A.12.B	2022-09-26 21:00:00	2024-07-26 21:00:00
3.A.12.C	2023-03-16 21:00:00	2024-11-16
3.A.12.D	2022-03-20 21:00:00	2024-09-04 21:00:00
3.A.12.E	2023-07-05	2024-11-25
3.A.12.F	2022-12-09 21:00:00	2024-11-29
3.A.12.G	2022-08-30 21:00:00	2024-11-25
3.A.12.H	2024-01-08 21:00:00	2024-06-27 21:00:00
3.A.13.A	2022-12-27 21:00:00	2024-12-12
3.A.13.B	2022-04-24 21:00:00	2024-10-07
3.A.13.C	2022-11-10 21:00:00	2024-10-18
3.A.13.D	2022-09-29 21:00:00	2024-07-30 21:00:00
3.A.13.E	2022-04-10 21:00:00	2024-07-10 21:00:00
3.A.13.F	2023-02-09 21:00:00	2024-12-10
3.A.13.G	2023-09-19 21:00:00	2024-10-30
3.A.13.H	2022-06-17 21:00:00	2024-04-10 21:00:00
3.A.13.I	2023-06-26 21:00:00	2024-10-10
3.A.13.J	2024-02-01 21:00:00	2024-05-26 21:00:00
3.A.13.K	2023-05-06 21:00:00	2024-09-01 21:00:00
3.A.13.L	2023-09-15 21:00:00	2024-12-04
3.A.13.M	2023-10-29 21:00:00	2024-11-19
3.A.2.A	2022-06-15 21:00:00	2023-12-18 21:00:00
3.A.2.B	2022-09-27 21:00:00	2024-05-22 21:00:00
3.A.2.C	2022-06-15 21:00:00	2023-08-29 21:00:00
3.A.2.D	2021-12-27	2024-09-27
3.A.3.A	2022-08-17 21:00:00	2024-03-16 21:00:00
3.A.3.B	2022-07-21 21:00:00	2024-06-30 21:00:00
3.A.3.C	2023-01-11 21:00:00	2024-10-27
3.A.3.D	2022-05-05 21:00:00	2024-03-12 21:00:00
3.A.3.E	2022-08-01 21:00:00	2024-06-16 21:00:00
3.A.3.F	2022-02-17	2024-03-21 21:00:00
3.A.3.G	2022-06-15 21:00:00	2024-06-06 21:00:00
3.A.3.H	2022-02-02	2024-01-28 21:00:00
3.A.3.I	2022-01-20	2024-11-05
3.A.3.J	2022-04-26 21:00:00	2024-07-31 21:00:00
3.A.3.K	2022-06-08 21:00:00	2024-06-25 21:00:00
3.A.3.L	2022-06-07 21:00:00	2024-08-01 21:00:00
3.A.3.M	2022-05-25	2024-06-07 21:00:00
3.A.4.A	2024-05-26 21:00:00	2024-08-22 21:00:00
3.A.4.B	2021-11-27 21:00:00	2024-05-06 21:00:00
3.A.4.C	2021-12-02	2024-04-20 21:00:00
3.A.4.D	2022-04-24 21:00:00	2024-08-01 21:00:00
3.A.4.E	2021-12-25	2024-04-04 21:00:00
3.A.4.F	2022-04-20 21:00:00	2024-09-20
3.A.4.G	2022-06-15 21:00:00	2024-05-15 21:00:00
3.A.4.H	2023-02-23 21:00:00	2024-11-02
3.A.4.I	2022-06-15 21:00:00	2024-10-22
3.A.4.J	2022-05-15 21:00:00	2024-11-25
3.A.4.K	2022-09-11 21:00:00	2024-12-03
3.A.4.L	2023-04-05 21:00:00	2024-09-04 21:00:00
3.A.4.M	2022-09-26 21:00:00	2023-07-21 21:00:00
3.A.4.N	2022-09-29 21:00:00	2024-08-04 21:00:00
3.A.4.O	2022-09-07 21:00:00	2024-11-11
3.A.4.P	2022-07-12 21:00:00	2023-05-29 21:00:00
3.A.5.A	2024-06-11 21:00:00	2024-11-27
3.A.5.B	2022-08-30 21:00:00	2024-05-12 21:00:00
3.A.5.C	2023-02-16 21:00:00	2024-10-04
3.A.5.D	2021-11-20	2024-10-02
3.A.5.E	2021-11-18	2024-09-24
3.A.5.F	2022-04-04 21:00:00	2024-12-09
3.A.5.G	2022-05-09 21:00:00	2024-12-06
3.A.6.A	2022-09-25 21:00:00	2024-12-04
3.A.6.B	2022-07-01	2024-12-09
3.A.6.C	2022-06-01	2024-11-01
3.A.6.D	2022-06-24	2024-04-10 21:00:00
3.A.6.E	2022-10-05 21:00:00	2024-08-31 21:00:00
3.A.6.F	2023-11-29 21:00:00	2024-11-14
3.A.6.G	2023-02-25 21:00:00	2024-12-15
3.A.7.A	2021-12-09	2023-06-20
3.A.7.B	2023-04-10 21:00:00	2024-11-16
3.A.7.C	2023-12-17 21:00:00	2024-12-14
3.A.7.D	2022-08-08 21:00:00	2022-10-05 21:00:00
3.A.7.E	2022-05-11 21:00:00	2023-02-13 21:00:00
3.A.8.A	2022-08-18 21:00:00	2024-12-05
3.A.8.B	2022-04-04 21:00:00	2222-04-04 21:00:00
3.A.8.C	2022-07-31 21:00:00	2024-12-10
3.A.8.D	2023-01-25 21:00:00	2023-08-09 21:00:00
3.A.8.E	2022-01-21	2024-07-03 21:00:00
3.A.9.A	2022-07-26 21:00:00	2024-10-09
3.A.9.B	2023-03-19 21:00:00	2024-07-16 21:00:00
3.A.9.C	2023-10-27 21:00:00	2024-05-19 21:00:00
3.B.1.A	2022-08-17 21:00:00	2024-01-23 21:00:00
(blank)
Grand Total	2021-08-21	2222-04-04 21:00:00

## Sheet: Supp.Table 4
Row Labels	Count of Facility
1.A.1.A	3
F15	1
F25	1
F36	1
1.A.1.B	11
F12	2
F32	1
F33	1
F34	1
F36	2
F39	3
F41	1
1.A.10.A	7
F02	1
F36	3
F39	3
1.A.10.B	31
F02	1
F12	2
F27	1
F29	1
F30	1
F33	3
F36	9
F38	2
F39	11
1.A.11.A	37
F02	1
F12	1
F20	1
F26	1
F28	2
F29	1
F30	2
F31	1
F33	2
F35	2
F36	10
F38	1
F39	5
F40	2
F41	5
1.A.11.B	47
F10	2
F12	4
F25	1
F33	5
F35	2
F36	24
F38	1
F39	8
1.A.11.C	60
F02	3
F09	1
F10	4
F12	3
F13	1
F14	1
F15	2
F23	1
F28	1
F29	1
F33	4
F34	1
F35	2
F36	10
F38	6
F39	16
F41	3
1.A.12.A	27
F02	1
F13	2
F28	1
F29	1
F31	1
F33	3
F36	8
F39	10
1.A.12.B	28
F08	1
F10	1
F12	2
F13	1
F28	1
F36	17
F38	3
F39	2
1.A.12.C	77
F02	1
F10	4
F12	5
F13	3
F15	1
F23	1
F28	1
F29	2
F30	2
F33	2
F36	29
F38	2
F39	24
1.A.13.A	68
F09	1
F10	3
F12	8
F15	1
F23	1
F25	1
F28	3
F29	3
F31	2
F33	5
F35	2
F36	17
F38	1
F39	15
F40	3
F41	2
1.A.13.B	28
F03	1
F06	1
F10	1
F12	2
F15	2
F33	2
F36	9
F38	3
F39	7
1.A.13.C	27
F02	1
F12	1
F35	1
F36	20
F39	2
F41	2
1.A.13.D	39
F02	1
F10	3
F12	1
F24	1
F25	2
F29	2
F30	2
F33	2
F35	1
F36	16
F39	8
1.A.13.E	36
F03	1
F10	3
F12	4
F28	2
F30	1
F33	1
F36	11
F39	10
F41	3
1.A.13.F	58
F02	1
F10	3
F12	3
F13	1
F14	1
F15	4
F23	1
F28	2
F29	2
F30	2
F36	21
F38	4
F39	13
1.A.2.A	6
F12	1
F38	1
F39	4
1.A.2.B	31
F12	3
F16	1
F28	1
F29	2
F31	1
F35	1
F36	10
F38	4
F39	6
F40	1
F41	1
1.A.2.C	9
F33	1
F36	6
F41	2
1.A.2.D	4
F36	3
F41	1
1.A.2.E	13
F15	1
F33	1
F35	1
F36	6
F39	2
F40	1
F41	1
1.A.2.F	17
F14	2
F15	1
F30	2
F36	8
F38	1
F39	3
1.A.2.G	6
F13	2
F36	4
1.A.2.H	53
F02	3
F12	2
F14	1
F17	2
F25	1
F28	2
F29	2
F30	3
F32	1
F33	2
F36	8
F38	9
F39	12
F40	4
F41	1
1.A.2.I	39
F12	2
F14	1
F15	1
F23	1
F31	1
F33	4
F34	1
F35	1
F36	11
F39	6
F40	3
F41	7
1.A.3.A	37
F10	2
F12	3
F25	1
F28	2
F30	1
F31	2
F33	4
F35	2
F36	11
F38	1
F39	5
F41	3
1.A.3.B	11
F02	2
F12	1
F31	1
F35	1
F36	6
1.A.3.C	43
F10	1
F12	2
F15	1
F23	1
F25	1
F28	2
F33	1
F36	15
F38	5
F39	8
F41	6
1.A.3.D	35
F29	2
F31	1
F33	8
F36	11
F38	3
F39	9
F41	1
1.A.3.E	35
F02	1
F13	1
F15	3
F23	1
F25	1
F28	1
F31	1
F33	5
F36	13
F38	1
F39	7
1.A.4.A	15
F17	1
F28	2
F33	1
F35	1
F36	3
F38	2
F39	5
1.A.4.B	24
F03	1
F12	2
F13	1
F14	1
F31	2
F33	2
F34	1
F36	6
F38	3
F39	3
F40	1
F41	1
1.A.4.C	12
F10	2
F25	1
F33	4
F36	2
F40	1
F41	2
1.A.4.D	15
F10	1
F36	9
F38	1
F39	4
1.A.4.E	27
F12	3
F13	1
F14	1
F30	2
F33	4
F34	1
F36	11
F38	2
F41	2
1.A.5.A	9
F15	2
F31	1
F39	4
F40	1
F41	1
1.A.5.B	9
F15	1
F33	2
F36	1
F38	4
F39	1
1.A.5.C	13
F12	2
F14	1
F25	1
F31	2
F33	1
F34	1
F39	2
F40	3
1.A.6.A	6
F31	1
F36	5
1.A.7.A	13
F10	2
F12	1
F13	2
F25	1
F29	1
F36	6
1.A.8.A	37
F02	1
F12	3
F15	2
F17	1
F25	1
F28	1
F31	3
F33	2
F36	16
F39	7
1.A.9.A	27
F09	1
F10	1
F12	1
F31	1
F36	12
F38	2
F39	8
F40	1
1.B.1.A	134
F02	1
F10	1
F12	2
F13	4
F15	1
F23	1
F28	3
F30	2
F33	2
F35	2
F36	101
F38	7
F39	7
1.B.2.A	87
F02	3
F07	1
F10	2
F14	1
F20	1
F23	3
F28	1
F29	6
F33	4
F34	1
F35	2
F36	41
F38	5
F39	13
F40	1
F41	2
1.B.3.A	74
F02	4
F10	1
F12	2
F15	4
F23	4
F28	5
F29	2
F30	1
F33	3
F35	1
F36	30
F38	1
F39	14
F40	1
F41	1
1.B.4.A	47
F02	1
F12	2
F13	2
F25	1
F28	2
F29	3
F30	3
F31	1
F33	2
F35	1
F36	17
F38	1
F39	11
1.B.5.A	90
F10	1
F12	2
F13	2
F15	1
F28	1
F29	6
F33	7
F35	1
F36	52
F38	5
F39	12
3.A.1.A	7
F12	1
F23	2
F33	3
F36	1
3.A.1.B	19
F28	1
F36	12
F39	4
F40	1
F41	1
3.A.1.C	8
F12	1
F31	1
F35	1
F36	2
F39	1
F40	1
F41	1
3.A.1.D	40
F12	4
F14	1
F28	1
F29	1
F31	1
F36	20
F38	3
F39	4
F40	3
F41	2
3.A.10.A	19
F09	1
F12	1
F36	15
F41	2
3.A.10.B	12
F12	1
F14	2
F28	2
F36	4
F39	3
3.A.10.C	15
F09	1
F13	1
F36	5
F38	1
F39	5
F41	2
3.A.10.D	14
F13	1
F15	1
F33	2
F38	3
F39	7
3.A.10.E	56
F02	1
F12	4
F13	2
F25	1
F28	2
F30	1
F33	9
F36	17
F38	2
F39	17
3.A.10.F	10
F30	1
F36	8
F38	1
3.A.10.G	14
F07	1
F09	1
F12	1
F17	1
F31	1
F36	4
F40	2
F41	3
3.A.11.A	57
F12	4
F13	1
F23	4
F25	1
F28	2
F29	1
F31	2
F33	3
F36	22
F38	3
F39	11
F40	3
3.A.11.B	17
F10	2
F30	1
F33	1
F35	1
F36	8
F38	1
F39	3
3.A.11.C	13
F02	2
F15	1
F28	1
F36	2
F38	2
F39	5
3.A.11.D	12
F02	1
F12	1
F28	2
F30	1
F35	1
F36	2
F38	2
F39	2
3.A.11.E	42
F02	4
F12	1
F13	1
F14	1
F28	2
F29	1
F35	2
F36	21
F38	3
F39	6
3.A.11.F	18
F10	1
F25	1
F29	1
F33	2
F36	8
F39	5
3.A.11.G	10
F02	1
F09	1
F23	1
F36	5
F39	2
3.A.11.H	39
F10	1
F11	1
F12	1
F13	1
F23	1
F25	1
F28	1
F29	1
F30	1
F33	2
F34	1
F36	7
F38	2
F39	18
3.A.11.I	18
F14	1
F36	13
F38	3
F39	1
3.A.11.J	50
F02	3
F05	1
F12	4
F14	1
F25	1
F28	3
F33	5
F36	26
F38	1
F39	5
3.A.12.A	11
F12	2
F33	1
F36	6
F40	1
F41	1
3.A.12.B	21
F02	1
F12	2
F13	1
F14	2
F29	1
F36	9
F38	1
F39	4
3.A.12.C	37
F10	1
F15	1
F19	2
F23	1
F25	1
F28	2
F29	1
F33	1
F35	1
F36	18
F39	8
3.A.12.D	71
F10	3
F12	4
F13	3
F14	3
F23	1
F28	1
F29	1
F30	2
F31	3
F34	1
F36	30
F38	3
F39	10
F40	3
F41	3
3.A.12.E	34
F02	1
F10	1
F12	2
F30	1
F31	1
F33	1
F36	25
F39	2
3.A.12.F	13
F12	2
F30	1
F33	1
F36	6
F38	1
F39	2
3.A.12.G	34
F02	1
F29	1
F36	25
F39	5
F41	2
3.A.12.H	17
F12	1
F33	4
F35	1
F36	4
F38	2
F39	5
3.A.13.A	13
F12	2
F29	2
F33	4
F38	1
F39	2
F41	2
3.A.13.B	22
F12	1
F14	3
F27	1
F28	3
F31	2
F33	1
F36	4
F38	2
F39	4
F40	1
3.A.13.C	22
F10	3
F12	3
F29	1
F35	1
F36	6
F39	7
F41	1
3.A.13.D	56
F02	1
F10	3
F12	1
F13	3
F14	2
F15	1
F28	4
F29	3
F30	1
F33	1
F36	29
F38	1
F39	5
F41	1
3.A.13.E	48
F02	1
F12	3
F13	2
F14	1
F18	1
F25	1
F29	2
F33	3
F34	2
F35	1
F36	20
F39	6
F40	1
F41	4
3.A.13.F	19
F10	1
F28	2
F33	2
F36	12
F38	1
F39	1
3.A.13.G	22
F12	1
F13	1
F29	1
F33	2
F36	11
F39	6
3.A.13.H	19
F23	1
F25	2
F31	2
F36	11
F39	2
F41	1
3.A.13.I	9
F04	1
F10	2
F13	1
F29	1
F35	1
F36	2
F39	1
3.A.13.J	8
F12	1
F36	7
3.A.13.K	78
F02	1
F12	2
F13	4
F14	2
F16	1
F23	1
F28	6
F29	1
F30	1
F33	4
F36	49
F39	6
3.A.13.L	52
F09	1
F13	1
F14	1
F20	1
F28	1
F35	1
F36	42
F39	4
3.A.13.M	59
F02	2
F13	4
F30	2
F33	2
F36	48
F39	1
3.A.2.A	14
F12	7
F15	1
F33	1
F36	2
F40	1
F41	2
3.A.2.B	7
F15	1
F33	1
F36	3
F39	1
F41	1
3.A.2.C	5
F12	1
F36	3
F39	1
3.A.2.D	60
F02	1
F06	1
F12	5
F14	1
F17	3
F28	1
F29	1
F31	2
F32	1
F33	1
F35	1
F36	23
F38	6
F39	3
F40	3
F41	7
3.A.3.A	23
F02	1
F10	2
F12	1
F14	3
F25	2
F33	7
F35	1
F36	5
F38	1
3.A.3.B	20
F06	2
F10	5
F15	1
F33	2
F34	1
F35	1
F36	3
F38	2
F39	2
F40	1
3.A.3.C	24
F10	3
F12	2
F20	1
F21	1
F29	1
F36	14
F38	1
F39	1
3.A.3.D	16
F18	2
F19	1
F28	1
F29	2
F31	1
F33	3
F36	2
F39	1
F40	2
F41	1
3.A.3.E	11
F29	1
F36	7
F40	3
3.A.3.F	19
F10	1
F12	3
F25	1
F29	1
F30	1
F31	1
F33	1
F36	8
F39	1
F40	1
3.A.3.G	11
F10	1
F12	5
F13	1
F25	1
F39	1
F40	1
F41	1
3.A.3.H	13
F02	1
F12	1
F13	1
F14	1
F17	1
F31	1
F33	2
F36	1
F39	3
F41	1
3.A.3.I	13
F12	1
F13	1
F16	1
F17	1
F29	1
F36	5
F39	1
F40	1
F41	1
3.A.3.J	21
F07	1
F10	2
F13	1
F33	1
F36	16
3.A.3.K	44
F09	1
F10	2
F12	1
F18	1
F23	2
F28	2
F29	2
F33	3
F36	16
F38	5
F39	3
F40	6
3.A.3.L	25
F10	1
F12	4
F13	1
F25	1
F33	4
F36	5
F39	2
F40	6
F41	1
3.A.3.M	14
F31	1
F35	4
F36	4
F38	1
F39	1
F40	3
3.A.4.A	5
F36	5
3.A.4.B	41
F12	1
F13	3
F14	3
F25	1
F31	4
F33	1
F36	16
F38	4
F39	5
F40	2
F41	1
3.A.4.C	49
F02	1
F06	1
F12	6
F14	1
F15	2
F17	1
F29	2
F31	2
F32	2
F33	2
F34	1
F35	2
F36	6
F38	2
F39	5
F40	7
F41	6
3.A.4.D	57
F02	2
F08	1
F09	1
F12	3
F14	2
F15	3
F23	1
F25	1
F28	3
F30	1
F31	3
F33	4
F35	3
F36	7
F38	1
F39	16
F40	1
F41	4
3.A.4.E	9
F10	1
F12	1
F35	1
F39	3
F41	3
3.A.4.F	57
F02	2
F07	1
F09	1
F10	1
F12	4
F13	2
F17	1
F20	1
F23	2
F29	5
F30	1
F31	1
F33	2
F35	3
F36	21
F38	1
F39	6
F41	2
3.A.4.G	35
F12	2
F15	3
F29	2
F30	1
F31	1
F32	1
F33	3
F34	1
F36	7
F39	8
F40	2
F41	4
3.A.4.H	10
F12	1
F29	1
F33	2
F36	6
3.A.4.I	5
F36	2
F39	2
F40	1
3.A.4.J	106
F02	2
F06	1
F10	7
F12	5
F14	1
F22	2
F25	1
F28	1
F29	4
F30	2
F31	3
F33	8
F35	1
F36	40
F38	4
F39	15
F40	5
F41	4
3.A.4.K	34
F02	2
F12	2
F25	2
F28	2
F30	1
F33	1
F35	2
F36	17
F39	5
3.A.4.L	16
F12	1
F25	1
F28	1
F36	13
3.A.4.M	6
F29	1
F33	1
F36	4
3.A.4.N	22
F02	1
F06	1
F14	2
F29	1
F33	1
F36	12
F39	1
F41	3
3.A.4.O	36
F02	2
F12	1
F14	2
F17	1
F28	1
F29	1
F30	1
F33	2
F36	14
F38	4
F39	5
F40	1
F41	1
3.A.4.P	8
F36	6
F39	2
3.A.5.A	8
F36	8
3.A.5.B	14
F10	2
F12	1
F13	2
F17	1
F29	1
F33	3
F36	1
F38	1
F41	2
3.A.5.C	19
F12	1
F25	1
F29	1
F36	13
F38	1
F39	2
3.A.5.D	19
F12	1
F14	1
F28	2
F29	2
F33	3
F35	3
F36	2
F38	1
F39	3
F40	1
3.A.5.E	167
F02	6
F05	1
F06	2
F10	8
F12	7
F13	2
F14	4
F17	1
F18	1
F19	2
F22	1
F25	1
F29	4
F31	10
F33	11
F34	1
F35	1
F36	65
F38	7
F39	14
F40	16
F41	2
3.A.5.F	45
F02	3
F10	2
F12	2
F13	1
F23	1
F28	3
F29	3
F30	2
F31	1
F33	2
F36	15
F38	2
F39	8
3.A.5.G	14
F02	1
F09	1
F10	1
F12	1
F14	1
F28	1
F29	1
F31	2
F33	1
F35	1
F39	1
F41	2
3.A.6.A	29
F02	1
F12	3
F14	2
F33	2
F35	1
F36	11
F38	1
F39	8
3.A.6.B	65
F01	2
F02	2
F10	3
F12	2
F13	3
F15	2
F17	1
F25	1
F28	4
F29	3
F33	6
F35	2
F36	18
F39	11
F40	2
F41	3
3.A.6.C	15
F06	1
F14	1
F29	1
F31	1
F33	3
F36	5
F39	2
F40	1
3.A.6.D	18
F12	1
F13	1
F15	2
F28	1
F29	1
F31	1
F33	1
F35	1
F36	7
F39	2
3.A.6.E	94
F02	2
F07	1
F10	2
F12	3
F13	1
F14	2
F15	1
F23	1
F25	1
F27	1
F28	1
F29	3
F30	2
F32	1
F33	14
F35	1
F36	34
F38	5
F39	17
F40	1
3.A.6.F	6
F02	2
F28	1
F36	3
3.A.6.G	28
F02	1
F12	1
F14	2
F25	3
F30	1
F33	2
F36	13
F39	5
3.A.7.A	8
F12	1
F36	5
F37	1
F40	1
3.A.7.B	14
F12	1
F14	1
F25	1
F28	2
F30	1
F36	4
F39	4
3.A.7.C	7
F09	1
F28	1
F33	1
F36	4
3.A.7.D	5
F12	1
F36	2
F40	2
3.A.7.E	8
F25	1
F31	1
F35	1
F36	1
F38	4
3.A.8.A	53
F10	4
F12	6
F13	1
F14	1
F33	3
F36	27
F39	9
F40	2
3.A.8.B	9
F07	1
F13	3
F28	1
F33	1
F35	2
F36	1
3.A.8.C	26
F10	2
F12	1
F28	2
F29	3
F33	2
F36	12
F38	1
F39	1
F40	2
3.A.8.D	12
F25	1
F28	1
F36	9
F39	1
3.A.8.E	13
F14	1
F17	1
F29	1
F35	4
F36	2
F39	1
F40	3
3.A.9.A	17
F02	1
F12	1
F29	3
F33	1
F35	1
F36	9
F39	1
3.A.9.B	26
F12	9
F13	1
F25	2
F29	2
F33	2
F36	5
F38	1
F39	4
3.A.9.C	11
F10	2
F30	1
F33	3
F39	5
3.B.1.A	9
F15	7
F40	2
Grand Total	4312

## Sheet: Supp. Table 5
Selected for Genes	Alleles Found
B9J08_004109	Leu41His, Ser105Phe, Ser105Tyr, Pro133Ser, Ser341Pro, Ala398Val, GluAla415AspVal, Ala422Val, Asp498Val, Ser540Leu, Gly673Asp, Ile690Thr, Gly700Asp, Asp875Asn, Thr1021Ala, Thr1134Ile, Lys1312Asn, Val1282Ile, Ser1334Ala, Leu1341Ile, Ile1414Val, Ile1457Val, Thr1523Asn, Asn1581Asp, Met1599Leu, Ile1632Val, Asp1842Asn, Glu1876Gln, Asp2041Asn, Ile2064fs, Thr2322Ala		Supplemental Table 5) Presenting Alleles Across the Three Major C. auris Clusters
B9J08_000964	Ile301Phe, Phe635del, Phe635Leu, Phe635Tyr, Leu638Phe, Ser639Phe, Ser639Pro, Ser639Thr, Ser639Tyr, Leu640Val, Arg641Gly, Arg641Ser, Asp642Tyr, Asp642Val, Pro643Ala, Leu686Phe, Met690Ile, Trp1351Arg, Arg1354His, Leu1357Phe, Ser1358Phe, Ile1361Thr		Each of these locus tags highlighted from Table 2. *-stop codon, dup – duplication, fs-frameshift, delins – deletion/insertion.
B9J08_004076	Pro4fs, Gln16*, Leu20*, Gly35fs, Val49del, Glu64*, Cys81Tyr, Val83Asp, Ser84Leu, Arg87Lys, Ala88Thr, Ala88Val, Arg101Leu, Val103Gly, Gly106Asp, Glu115*, Val135Leu, Leu142fs, Ala151Thr, Gly176Asp, Glu182fs, Glu182_Pro185del, Gly207Asp, Tyr216Asn, Ter219Trpext*?
B9J08_002654	Pro37fs, Leu84fs, Leu95fs, Pro116fs, Ser132*, Asn145fs, Gln149*, Gln156*, Gln156fs, Gln235*, Leu159fs, Arg180Gln, Ala258fs, Ser271Phe, Trp290*, Arg332*, Leu349fs, Ser375fs
B9J08_004112	Gly173Cys, Val193Asp, Val225Met, Asn241Ser, Val288Ile, Gly310Cys, Trp934*, Pro961Leu, Pro1029Ser, Ser1217Ala, Ile1393Val, Thr1405fs, Thr1448fs, Ala1751fs
B9J08_002041	Ala72Asp, Pro1200Leu, Ala1670Thr, Ser1702Leu, Thr2017Ala, Ala2313Val, Ser2584Phe, Met2738Ile, Asp2833Asn, Asp3290His, Asn3512Thr, Ala3666Thr, Asp4368Gly
B9J08_002136	Val12Met, Pro44fs, Ser49fs, Gln130*, Gln181*, Gln200fs, Gln211*, Gln225*, Gln266*, Gly257Asp, Ile308Thr, Cys327Tyr
B9J08_004411	Ser302Phe, Gln463Lys, Gln653Leu, Gln665del, Gln665dup, Gln667dup, Gln695dup, Gln700dup
B9J08_003924	Phe2214fs, Phe282Ile, Ala409Thr, Ala552Glu, Pro651Ser, Thr804Ile, Gly811fs, Val991Ala, Ala2260Glu, Arg2279His, Asn2604Asp
B9J08_004870	Gln28fs, Gln32*, Tyr56fs, Ser65*, Ser65fs, Tyr75fs, Gln142_Lys143delinsTer, Pro158fs, Tyr159His, Leu168Phe, Phe183Leu
B9J08_000092	Asp133Glu, Ile1533Met, Trp2249Arg, Pro2987Ser, Asn3706Tyr, Tyr3833Phe
B9J08_004820	Lys162Met, Ser192Asn, Ser195Gly, Thr362Ser, Ser427Asn, Pro447Leu, Ala640Val, Ser757Tyr, Leu762Phe, Cys765Trp, Ala831Val
